# Supplementary material for: Thermally Crosslinked Hydrogen-Bonded Organic Framework Membranes for Highly Selective Ion Separation
Source: MDPI journal article supplement (doi:10.3390/molecules28052173), 2023-02-26

## checkCIF/PLATON report

You have not supplied any structure factors. As a result the full set of tests cannot be run.

THIS REPORT IS FOR GUIDANCE ONLY. IF USED AS PART OF A REVIEW PROCEDURE FOR PUBLICATION, IT SHOULD NOT REPLACE THE EXPERTISE OF AN EXPERIENCED CRYSTALLOGRAPHIC REFEREE.

No syntax errors found.      CIF dictionary      Interpreting this report

### Datablock: ga\_210122a\_a

---

|                        |                          |                           |
|------------------------|--------------------------|---------------------------|
| Bond precision:        | C-C = 0.0023 A           | Wavelength=1.34138        |
| Cell:                  | a=3.6813 (1)<br>alpha=90 | b=11.5900 (4)<br>beta=90  |
|                        |                          | c=15.8935 (5)<br>gamma=90 |
| Temperature:           | 173 K                    |                           |
|                        | Calculated               | Reported                  |
| Volume                 | 678.12 (4)               | 678.12 (4)                |
| Space group            | P n n m                  | P n n m                   |
| Hall group             | -P 2 2n                  | -P 2 2n                   |
| Moiety formula         | C12 H12 N10, 2 (H2 O)    | C12 H12 N10, H4 O2        |
| Sum formula            | C12 H16 N10 O2           | C12 H16 N10 O2            |
| Mr                     | 332.35                   | 332.35                    |
| Dx, g cm <sup>-3</sup> | 1.628                    | 1.628                     |
| Z                      | 2                        | 2                         |
| Mu (mm <sup>-1</sup> ) | 0.643                    | 0.648                     |
| F000                   | 348.0                    | 348.0                     |
| F000'                  | 348.84                   |                           |
| h, k, lmax             | 4, 14, 20                | 4, 14, 20                 |
| Nref                   | 761                      | 760                       |
| Tmin, Tmax             | 0.954, 0.968             | 0.647, 0.751              |
| Tmin'                  | 0.931                    |                           |

Correction method= # Reported T Limits: Tmin=0.647 Tmax=0.751  
AbsCorr = NONE

Data completeness= 0.999      Theta (max)= 58.107

|                               |                                 |
|-------------------------------|---------------------------------|
| R(reflections)= 0.0568 ( 657) | wR2(reflections)= 0.1641 ( 760) |
| S = 1.195                     | Npar= 61                        |

---

The following ALERTS were generated. Each ALERT has the format

**test-name\_ALERT\_alert-type\_alert-level.**

Click on the hyperlinks for more details of the test.

---

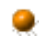

#### Alert level B

DIFMN02\_ALERT\_2\_B The minimum difference density is < -0.1\*ZMAX\*1.00

\_refine\_diff\_density\_min given = -0.899

Test value = -0.800

PLAT098\_ALERT\_2\_B Large Reported Min. (Negative) Residual Density -0.90 eA-3

---

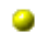

#### Alert level C

DIFMN03\_ALERT\_1\_C The minimum difference density is < -0.1\*ZMAX\*0.75

The relevant atom site should be identified.

DIFMX02\_ALERT\_1\_C The maximum difference density is > 0.1\*ZMAX\*0.75

The relevant atom site should be identified.

PLAT042\_ALERT\_1\_C Calc. and Reported MoietyFormula Strings Differ Please Check

PLAT097\_ALERT\_2\_C Large Reported Max. (Positive) Residual Density 0.80 eA-3

---

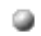

#### Alert level G

ABSMU01\_ALERT\_1\_G Calculation of \_exptl\_absorpt\_correction\_mu

not performed for this radiation type.

PLAT007\_ALERT\_5\_G Number of Unrefined Donor-H Atoms ..... 4 Report

PLAT012\_ALERT\_1\_G No \_shelx\_res\_checksum Found in CIF ..... Please Check

PLAT300\_ALERT\_4\_G Atom Site Occupancy of H1C Constrained at 0.5 Check

PLAT300\_ALERT\_4\_G Atom Site Occupancy of H1D Constrained at 0.5 Check

PLAT417\_ALERT\_2\_G Short Inter D-H..H-D H1A ..H1C . 1.71 Ang.

1+x,y,1-z = 6\_656 Check

PLAT883\_ALERT\_1\_G No Info/Value for \_atom\_sites\_solution\_primary . Please Do !

PLAT984\_ALERT\_1\_G The C-f' = 0.0150 Deviates from the B&C-Value 0.0137 Check

PLAT984\_ALERT\_1\_G The O-f' = 0.0410 Deviates from the B&C-Value 0.0389 Check

---

0 **ALERT level A** = Most likely a serious problem - resolve or explain

2 **ALERT level B** = A potentially serious problem, consider carefully

4 **ALERT level C** = Check. Ensure it is not caused by an omission or oversight

9 **ALERT level G** = General information/check it is not something unexpected

8 ALERT type 1 CIF construction/syntax error, inconsistent or missing data

4 ALERT type 2 Indicator that the structure model may be wrong or deficient

0 ALERT type 3 Indicator that the structure quality may be low

2 ALERT type 4 Improvement, methodology, query or suggestion

1 ALERT type 5 Informative message, check

---

It is advisable to attempt to resolve as many as possible of the alerts in all categories. Often the minor alerts point to easily fixed oversights, errors and omissions in your CIF or refinement strategy, so attention to these fine details can be worthwhile. In order to resolve some of the more serious problems it may be necessary to carry out additional measurements or structure refinements. However, the purpose of your study may justify the reported deviations and the more serious of these should normally be commented upon in the discussion or experimental section of a paper or in the "special\_details" fields of the CIF. checkCIF was carefully designed to identify outliers and unusual parameters, but every test has its limitations and alerts that are not important in a particular case may appear. Conversely, the absence of alerts does not guarantee there are no aspects of the results needing attention. It is up to the individual to critically assess their own results and, if necessary, seek expert advice.

### **Publication of your CIF in IUCr journals**

A basic structural check has been run on your CIF. These basic checks will be run on all CIFs submitted for publication in IUCr journals (*Acta Crystallographica*, *Journal of Applied Crystallography*, *Journal of Synchrotron Radiation*); however, if you intend to submit to *Acta Crystallographica Section C* or *E* or *IUCrData*, you should make sure that full publication checks are run on the final version of your CIF prior to submission.

### **Publication of your CIF in other journals**

Please refer to the *Notes for Authors* of the relevant journal for any special instructions relating to CIF submission.

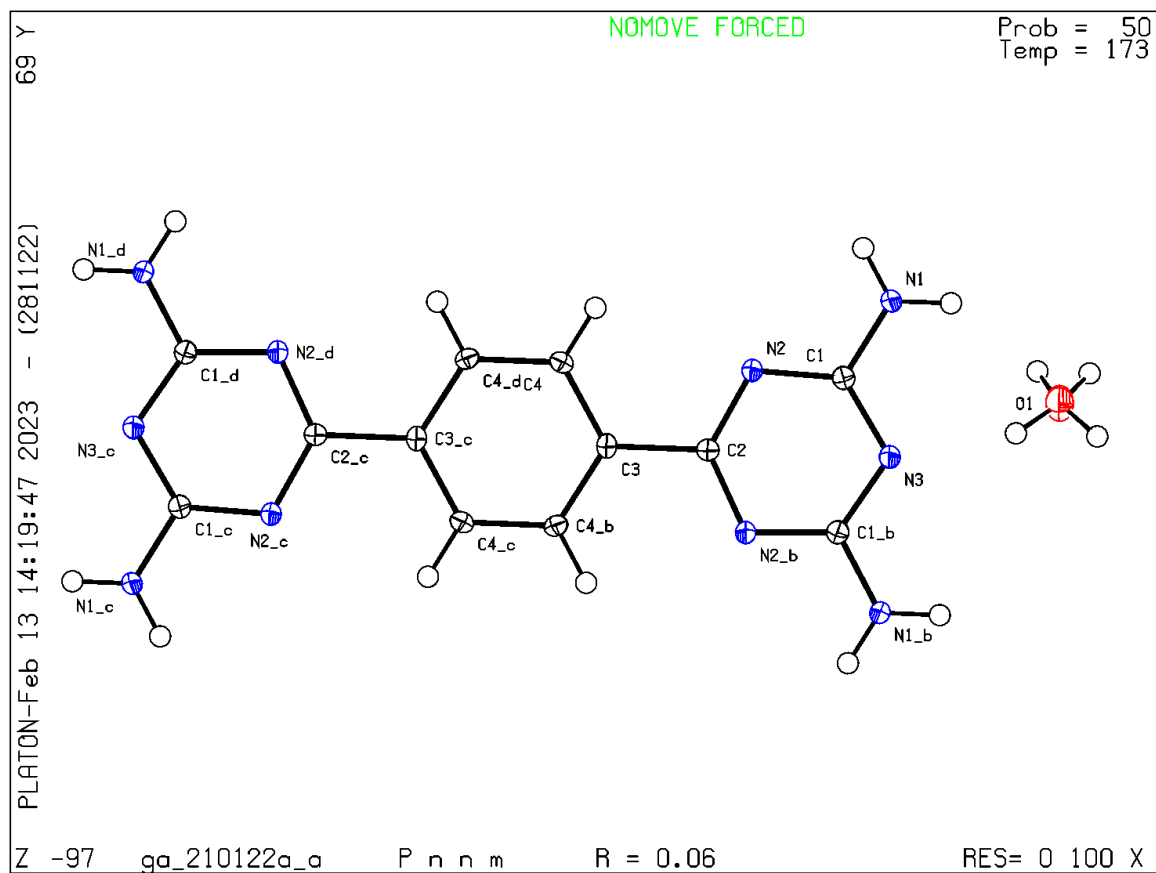

Supplement: s1 [file s1]
