# Supplementary material for: Thermally Crosslinked Hydrogen-Bonded Organic Framework Membranes for Highly Selective Ion Separation
Source: MDPI journal article supplement (doi:10.3390/molecules28052173), 2023-02-26
Supplement: s1 [file s1]

## **Supporting Information**

### **Thermally-Crosslinked Hydrogen-Bonded Organic Framework Membranes for Highly Selective Ion Separation**

Xiyu Song,<sup>1,2</sup> Chen Wang,<sup>2</sup> Xiangyu Gao,<sup>2</sup> Yao Wang,<sup>2</sup> Rui Xu,<sup>2</sup> Jian Wang,<sup>1,\*</sup> Peng Li<sup>2,\*</sup>

<sup>1</sup> School of Physical Education and Coaching, Shanghai University of Sport,  
Shanghai, 200438, China

<sup>2</sup> Department of Chemistry and Shanghai Key Laboratory of Molecular Catalysis and  
Innovative Materials, Fudan University, Shanghai 200437, China

\* Correspondence: [ilsrwang@163.com](mailto:ilsrwang@163.com) (J.W.); [penglichem@fudan.edu.cn](mailto:penglichem@fudan.edu.cn) (P.L.)

**Table S1.** Crystal data and structure refinement for FDU-HOF-1

| Name                                   | FDU-HOF-1                                                      |
|----------------------------------------|----------------------------------------------------------------|
| Empirical formula                      | C <sub>12</sub> H <sub>16</sub> N <sub>10</sub> O <sub>2</sub> |
| CCDC number                            | 2238476                                                        |
| Formula weight                         | 332.35                                                         |
| Temperature/K                          | 173                                                            |
| Crystal system                         | orthorhombic                                                   |
| Space group                            | Pnnm                                                           |
| a/ Å                                   | 3.6813 (1)                                                     |
| b/ Å                                   | 11.5900 (4)                                                    |
| c/ Å                                   | 15.8935 (5)                                                    |
| $\alpha^\circ$                         | 90                                                             |
| $\beta^\circ$                          | 90                                                             |
| $\gamma^\circ$                         | 90                                                             |
| Volume/Å <sup>3</sup>                  | 678.12 (4)                                                     |
| Z                                      | 2                                                              |
| $D_c$ (g·cm <sup>-3</sup> )            | 1.628                                                          |
| $\mu$ (mm <sup>-1</sup> )              | 0.643                                                          |
| $F(000)$                               | 348.0                                                          |
| Crystal size (mm)                      | 0.11 × 0.06 × 0.05                                             |
| $\theta$ range for data collection (°) | 4.107-58.107                                                   |
| Refinement method                      | Least Squares                                                  |

Data/restraints/parameters 760/0/63

Goodness-of-fit on  $F^2$  1.247

**Table S2.** Different Connolly radius of FDU-HOF-1 of occupied volume, free volume and surface area.

| Connolly radius (Å) | Occupied Volume (Å <sup>3</sup> ) | Free Volume (Å <sup>3</sup> ) | Surface area (Å <sup>2</sup> ) |
|---------------------|-----------------------------------|-------------------------------|--------------------------------|
| 0.6                 | 564.07                            | 114.05                        | 166.78                         |
| 0.9                 | 593.35                            | 84.76                         | 123.75                         |
| 1.3                 | 616.85                            | 61.26                         | 106.04                         |

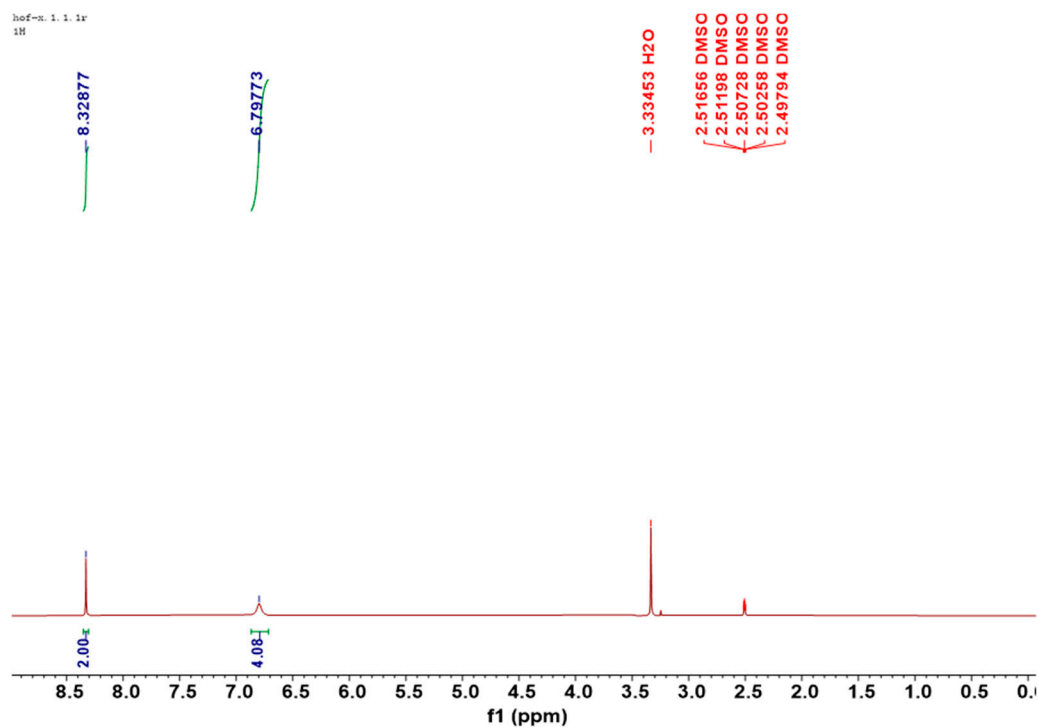

**Figure S1.**  $^1\text{H}$  NMR spectrum of BDQ.

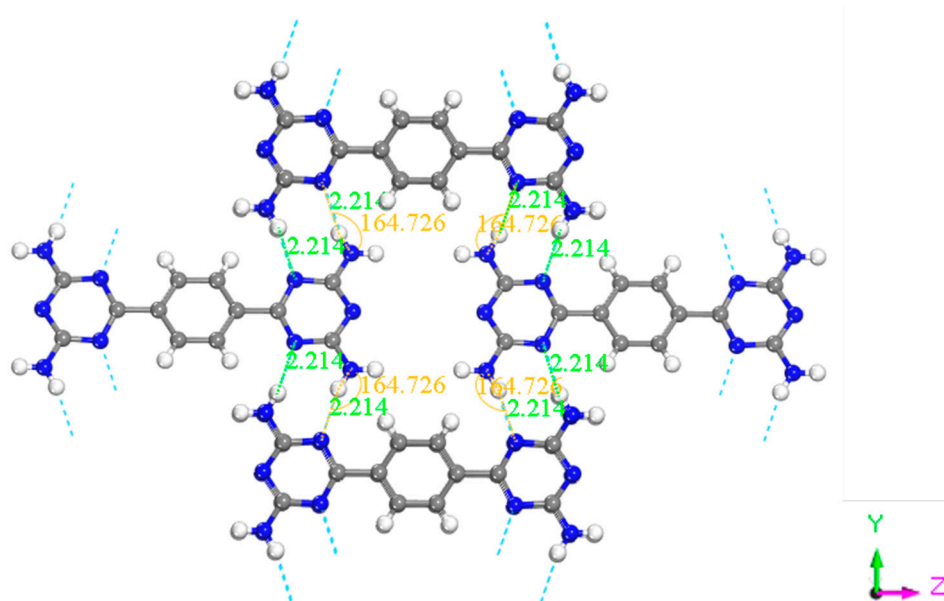

**Figure S2.** H-bonded distance and angle of BD-T ligand of FDU-HOF-1.

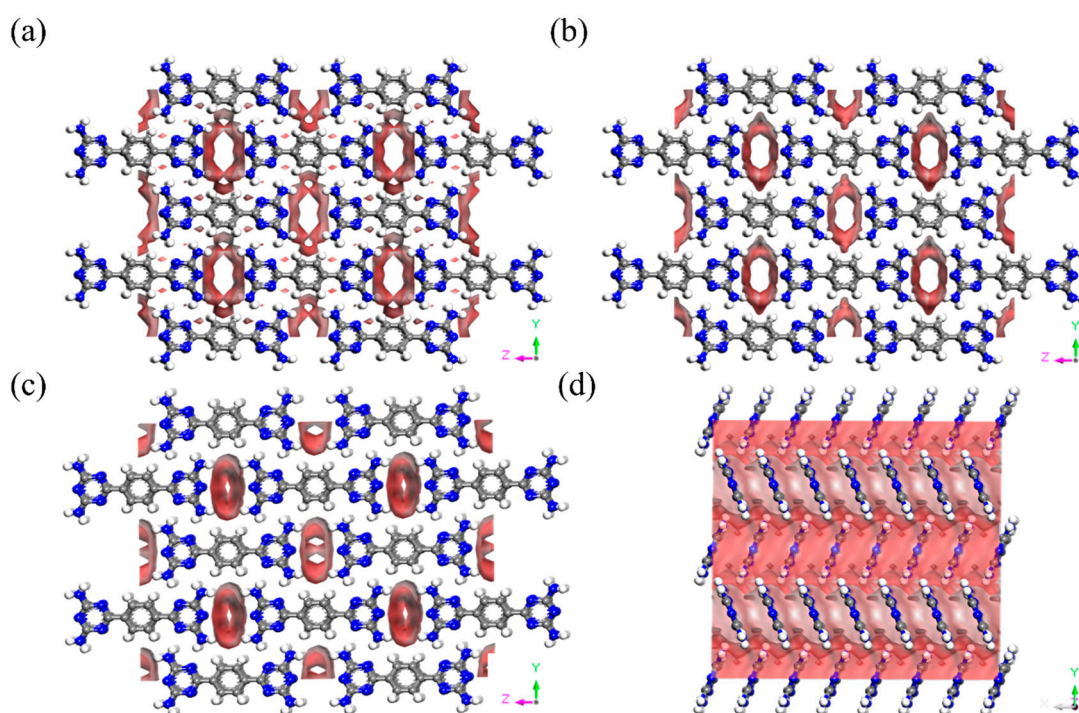

**Figure S3.** Pore structure at (a) 0.6 Å, (b) 0.9 Å and (c) 1.3 Å probe molecular sizes of FDU-HOF-1 in Materials Studio 2019. (d) Pore structure display along z-axis of FDU-HOF-1.

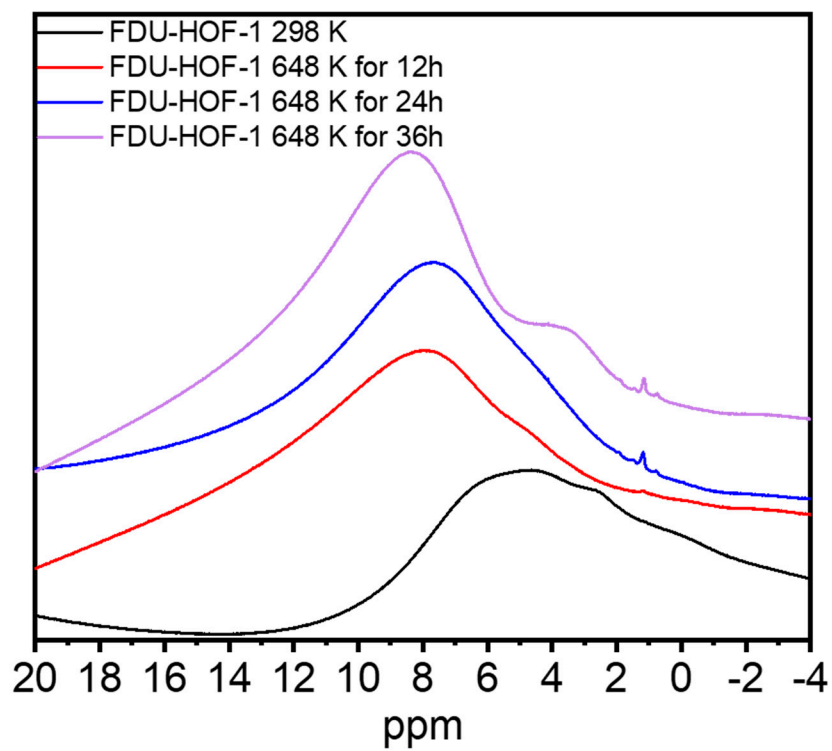

**Figure S4.** Solid-state  $^1\text{H}$  NMR spectrums of FDU-HOF-1.

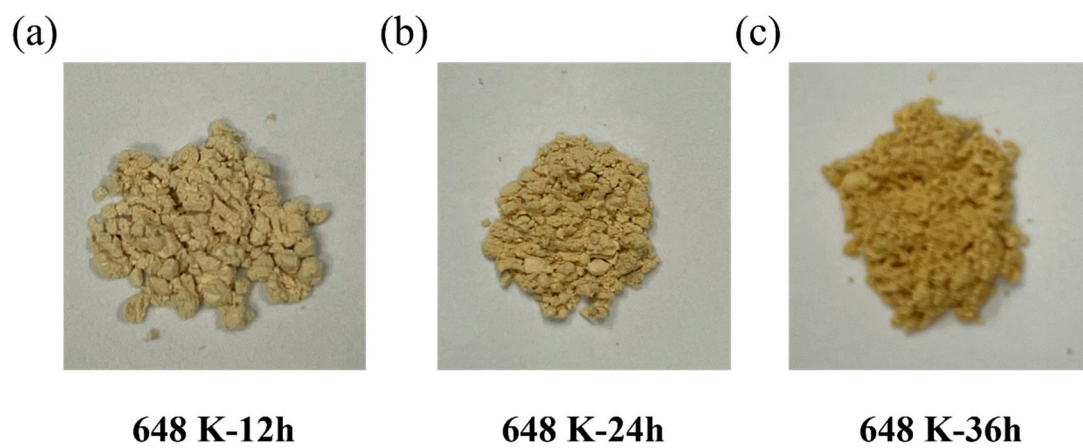

**Figure S5.** Photographs of FDU-HOF-1 powder after being treated under 648 K of (a) 12 h, (b) 24 h and (c) 36 h.
