# Supplementary material for: Thermally Crosslinked Hydrogen-Bonded Organic Framework Membranes for Highly Selective Ion Separation
Source: Molecules. 2023 Feb 26;28(5):2173. doi: 10.3390/molecules28052173 (PMC10004400; doi:10.3390/molecules28052173)
Supplement: Supplementary file 1 [file molecules-28-02173-s001.zip › File S1 FDU-HOF-1.cif]

data_ga_210122a_a
_audit_creation_date              2022-10-27
_audit_creation_method
;
Olex2 1.2
(compiled 2016.11.30 svn.r3356 for OlexSys, GUI svn.r5269)
;
_publ_contact_author_address      ?
_publ_contact_author_email        ?
_publ_contact_author_id_orcid     ?
_publ_contact_author_name         ''
_publ_contact_author_phone        ?
_publ_section_references
;
Burla, M.C., Caliandro, R., Camalli, M., Carrozzini, B., Cascarano, G.L.,
 De Caro, L., Giacovazzo, C., Polidori, G., Siliqi, D., Spagna, R.
 (2007). J. Appl. Cryst. 40, 609-613.

Dolomanov, O.V., Bourhis, L.J., Gildea, R.J, Howard, J.A.K. & Puschmann, H.
 (2009), J. Appl. Cryst. 42, 339-341.

Sheldrick, G.M. (2015). Acta Cryst. C71, 3-8.
;
_chemical_name_common             ?
_chemical_name_systematic         ?
_chemical_formula_moiety          '2(C12 H12 N10), 4(H2 O)'
_chemical_formula_sum             'C24 H24 N20 O'
_chemical_formula_weight          608.63
_chemical_melting_point           ?
loop_
  _atom_type_symbol
  _atom_type_description
  _atom_type_scat_dispersion_real
  _atom_type_scat_dispersion_imag
  _atom_type_scat_source
 'C' 'C' 0.0140 0.0070 'International Tables Vol C Tables 4.2.6.8 and 6.1.1.4'
 'H' 'H' 0.0000 0.0000 'International Tables Vol C Tables 4.2.6.8 and 6.1.1.4'
 'N' 'N' 0.0240 0.0130 'International Tables Vol C Tables 4.2.6.8 and 6.1.1.4'
 'O' 'O' 0.0390 0.0240 'International Tables Vol C Tables 4.2.6.8 and 6.1.1.4'

_shelx_space_group_comment
;
The symmetry employed for this shelxl refinement is uniquely defined
by the following loop, which should always be used as a source of
symmetry information in preference to the above space-group names.
They are only intended as comments.
;
_space_group_crystal_system       'orthorhombic'
_space_group_IT_number            58
_space_group_name_H-M_alt         'P n n m'
_space_group_name_Hall            '-P 2 2n'
loop_
  _space_group_symop_operation_xyz
 'x, y, z'
 '-x, -y, z'
 '-x+1/2, y+1/2, -z+1/2'
 'x+1/2, -y+1/2, -z+1/2'
 '-x, -y, -z'
 'x, y, -z'
 'x-1/2, -y-1/2, z-1/2'
 '-x-1/2, y-1/2, z-1/2'

_cell_length_a                    3.68130(10)
_cell_length_b                    11.5900(4)
_cell_length_c                    15.8935(5)
_cell_angle_alpha                 90
_cell_angle_beta                  90
_cell_angle_gamma                 90
_cell_volume                      678.12(4)
_cell_formula_units_Z             1
_cell_measurement_reflns_used     4771
_cell_measurement_temperature     173(2)
_cell_measurement_theta_max       57.93
_cell_measurement_theta_min       4.11
_shelx_estimated_absorpt_T_max    0.973
_shelx_estimated_absorpt_T_min    0.941
_exptl_absorpt_coefficient_mu     0.557
_exptl_absorpt_correction_T_max   0.7514
_exptl_absorpt_correction_T_min   0.6470
_exptl_absorpt_correction_type    none
_exptl_absorpt_process_details
;
SADABS-2016/2 (Bruker,2016/2) was used for absorption correction.
wR2(int) was 0.1355 before and 0.0886 after correction.
The Ratio of minimum to maximum transmission is 0.8611.
The \l/2 correction factor is Not present.
;
_exptl_absorpt_special_details    ?
_exptl_crystal_colour             colourless
_exptl_crystal_colour_primary     colourless
_exptl_crystal_density_diffrn     1.490
_exptl_crystal_density_meas       ?
_exptl_crystal_density_method     ?
_exptl_crystal_description        'block'
_exptl_crystal_F_000              316
_exptl_crystal_size_max           0.11
_exptl_crystal_size_mid           0.06
_exptl_crystal_size_min           0.05
_exptl_transmission_factor_max    ?
_exptl_transmission_factor_min    ?
_diffrn_reflns_av_R_equivalents   0.0635
_diffrn_reflns_av_unetI/netI      0.0365
_diffrn_reflns_Laue_measured_fraction_full 0.998
_diffrn_reflns_Laue_measured_fraction_max 0.999
_diffrn_reflns_limit_h_max        4
_diffrn_reflns_limit_h_min        -4
_diffrn_reflns_limit_k_max        14
_diffrn_reflns_limit_k_min        -13
_diffrn_reflns_limit_l_max        20
_diffrn_reflns_limit_l_min        -20
_diffrn_reflns_number             8451
_diffrn_reflns_point_group_measured_fraction_full 0.998
_diffrn_reflns_point_group_measured_fraction_max 0.999
_diffrn_reflns_theta_full         53.594
_diffrn_reflns_theta_max          58.107
_diffrn_reflns_theta_min          4.107
_diffrn_ambient_temperature       172.99
_diffrn_detector_area_resol_mean  ?
_diffrn_measured_fraction_theta_full 0.998
_diffrn_measured_fraction_theta_max 0.999
_diffrn_measurement_device_type   'Bruker APEX-II CCD'
_diffrn_measurement_method        '\f and \w scans'
_diffrn_radiation_type            GaK\a
_diffrn_radiation_wavelength      1.34138
_diffrn_source                    ?
_diffrn_standards_number          0
_reflns_Friedel_coverage          0.000
_reflns_Friedel_fraction_full     .
_reflns_Friedel_fraction_max      .
_reflns_number_gt                 657
_reflns_number_total              760
_reflns_special_details
;
 Reflections were merged by SHELXL according to the crystal
 class for the calculation of statistics and refinement.
 
 _reflns_Friedel_fraction is defined as the number of unique
 Friedel pairs measured divided by the number that would be
 possible theoretically, ignoring centric projections and
 systematic absences.
;
_reflns_threshold_expression      'I > 2\s(I)'
_computing_cell_refinement        'SAINT V8.38A (?, 2016)'
_computing_data_collection        ?
_computing_data_reduction         'SAINT V8.38A (?, 2016)'
_computing_molecular_graphics     'Olex2 (Dolomanov et al., 2009)'
_computing_publication_material   'Olex2 (Dolomanov et al., 2009)'
_computing_structure_refinement   'ShelXL (Sheldrick, 2015)'
_computing_structure_solution     'SIR2004 (Burla et al., 2007)'
_refine_diff_density_max          0.841
_refine_diff_density_min          -0.936
_refine_diff_density_rms          0.363
_refine_ls_extinction_coef        0.063(8)
_refine_ls_extinction_expression  'Fc^*^=kFc[1+0.001xFc^2^\l^3^/sin(2\q)]^-1/4^'
_refine_ls_extinction_method      'SHELXL-2019/2 (Sheldrick 2019)'
_refine_ls_goodness_of_fit_ref    1.247
_refine_ls_hydrogen_treatment     mixed
_refine_ls_matrix_type            full
_refine_ls_number_parameters      63
_refine_ls_number_reflns          760
_refine_ls_number_restraints      0
_refine_ls_R_factor_all           0.0763
_refine_ls_R_factor_gt            0.0709
_refine_ls_restrained_S_all       1.247
_refine_ls_shift/su_max           0.000
_refine_ls_shift/su_mean          0.000
_refine_ls_structure_factor_coef  Fsqd
_refine_ls_weighting_details
'w=1/[\s^2^(Fo^2^)+(0.0996P)^2^+0.1300P] where P=(Fo^2^+2Fc^2^)/3'
_refine_ls_weighting_scheme       calc
_refine_ls_wR_factor_gt           0.1531
_refine_ls_wR_factor_ref          0.1605
_refine_special_details           ?
_olex2_refinement_description
;
1. Fixed Uiso
 At 1.2 times of:
  All C(H) groups, All N(H,H) groups
2.a Aromatic/amide H refined with riding coordinates:
 C4(H4)
2.b X=CH2 refined with riding coordinates:
 N1(H1A,H1B)
;
_atom_sites_solution_hydrogens    mixed
_atom_sites_solution_primary      direct
_atom_sites_solution_secondary    ?
loop_
  _atom_site_label
  _atom_site_type_symbol
  _atom_site_fract_x
  _atom_site_fract_y
  _atom_site_fract_z
  _atom_site_U_iso_or_equiv
  _atom_site_adp_type
  _atom_site_occupancy
  _atom_site_site_symmetry_order
  _atom_site_calc_flag
  _atom_site_refinement_flags_posn
  _atom_site_refinement_flags_adp
  _atom_site_refinement_flags_occupancy
  _atom_site_disorder_assembly
  _atom_site_disorder_group
 N1 N 0.7461(4) 0.68159(11) 0.65335(8) 0.0172(5) Uani 1 1 d . . . . .
 H1A H 0.753557 0.680726 0.598016 0.021 Uiso 1 1 calc R . . . .
 H1B H 0.824343 0.742400 0.681116 0.021 Uiso 1 1 calc R . . . .
 N2 N 0.6053(3) 0.59726(10) 0.78006(8) 0.0140(5) Uani 1 1 d . . . . .
 N3 N 0.500000 0.500000 0.64946(11) 0.0152(5) Uani 1 2 d S T P . .
 C1 C 0.6162(4) 0.59077(12) 0.69514(10) 0.0131(5) Uani 1 1 d . . . . .
 C4 C 0.6449(4) 0.59319(12) 0.95635(9) 0.0133(5) Uani 1 1 d . . . . .
 H4 H 0.744046 0.656979 0.926661 0.016 Uiso 1 1 calc R . . . .
 C2 C 0.500000 0.500000 0.81823(12) 0.0119(5) Uani 1 2 d S T P . .
 C3 C 0.500000 0.500000 0.91184(12) 0.0124(6) Uani 1 2 d S T P . .
 O1 O 0.2062(5) 0.61810(15) 0.500000 0.0265(6) Uani 1 2 d S T P . .
 H1 H 0.265(9) 0.573(3) 0.4545(19) 0.066(9) Uiso 1 1 d . . . . .

loop_
  _atom_site_aniso_label
  _atom_site_aniso_U_11
  _atom_site_aniso_U_22
  _atom_site_aniso_U_33
  _atom_site_aniso_U_23
  _atom_site_aniso_U_13
  _atom_site_aniso_U_12
 N1 0.0265(8) 0.0136(8) 0.0116(7) 0.0000(5) 0.0017(5) -0.0037(5)
 N2 0.0177(8) 0.0127(8) 0.0117(8) -0.0002(4) 0.0004(4) -0.0009(4)
 N3 0.0210(10) 0.0124(10) 0.0123(9) 0.000 0.000 -0.0001(7)
 C1 0.0126(8) 0.0128(8) 0.0137(9) -0.0001(5) 0.0003(5) 0.0017(5)
 C4 0.0137(8) 0.0117(8) 0.0145(9) 0.0013(5) 0.0013(5) -0.0004(5)
 C2 0.0100(10) 0.0118(10) 0.0137(10) 0.000 0.000 0.0019(7)
 C3 0.0121(10) 0.0142(11) 0.0110(10) 0.000 0.000 0.0028(7)
 O1 0.0368(10) 0.0244(10) 0.0185(9) 0.000 0.000 0.0087(7)

_geom_special_details
;
 All esds (except the esd in the dihedral angle between two l.s. planes)
 are estimated using the full covariance matrix.  The cell esds are taken
 into account individually in the estimation of esds in distances, angles
 and torsion angles; correlations between esds in cell parameters are only
 used when they are defined by crystal symmetry.  An approximate (isotropic)
 treatment of cell esds is used for estimating esds involving l.s. planes.
;
loop_
  _geom_bond_atom_site_label_1
  _geom_bond_atom_site_label_2
  _geom_bond_distance
  _geom_bond_site_symmetry_2
  _geom_bond_publ_flag
 N1 H1A 0.8800 . ?
 N1 H1B 0.8800 . ?
 N1 C1 1.3333(18) . ?
 N2 C1 1.352(2) . ?
 N2 C2 1.3376(15) . ?
 N3 C1 1.3478(17) . ?
 N3 C1 1.3478(17) 2_665 ?
 C4 C4 1.387(3) 6_557 ?
 C4 H4 0.9500 . ?
 C4 C3 1.3970(18) . ?
 C2 C3 1.488(3) . ?
 O1 H1 0.92(3) . ?

loop_
  _geom_angle_atom_site_label_1
  _geom_angle_atom_site_label_2
  _geom_angle_atom_site_label_3
  _geom_angle
  _geom_angle_site_symmetry_1
  _geom_angle_site_symmetry_3
  _geom_angle_publ_flag
 H1A N1 H1B 120.0 . . ?
 C1 N1 H1A 120.0 . . ?
 C1 N1 H1B 120.0 . . ?
 C2 N2 C1 114.47(13) . . ?
 C1 N3 C1 114.82(17) 2_665 . ?
 N1 C1 N2 117.62(12) . . ?
 N1 C1 N3 117.50(14) . . ?
 N3 C1 N2 124.87(13) . . ?
 C4 C4 H4 119.8 6_557 . ?
 C4 C4 C3 120.43(10) 6_557 . ?
 C3 C4 H4 119.8 . . ?
 N2 C2 N2 126.06(18) 2_665 . ?
 N2 C2 C3 116.97(9) 2_665 . ?
 N2 C2 C3 116.97(9) . . ?
 C4 C3 C4 119.15(19) . 2_665 ?
 C4 C3 C2 120.43(10) 2_665 . ?
 C4 C3 C2 120.43(10) . . ?

loop_
  _geom_torsion_atom_site_label_1
  _geom_torsion_atom_site_label_2
  _geom_torsion_atom_site_label_3
  _geom_torsion_atom_site_label_4
  _geom_torsion
  _geom_torsion_site_symmetry_1
  _geom_torsion_site_symmetry_2
  _geom_torsion_site_symmetry_3
  _geom_torsion_site_symmetry_4
  _geom_torsion_publ_flag
 N2 C2 C3 C4 172.70(9) . . . 2_665 ?
 N2 C2 C3 C4 172.70(9) 2_665 . . . ?
 N2 C2 C3 C4 -7.30(9) . . . . ?
 N2 C2 C3 C4 -7.30(9) 2_665 . . 2_665 ?
 C1 N2 C2 N2 -2.90(8) . . . 2_665 ?
 C1 N2 C2 C3 177.10(8) . . . . ?
 C1 N3 C1 N1 177.74(15) 2_665 . . . ?
 C1 N3 C1 N2 -3.37(10) 2_665 . . . ?
 C4 C4 C3 C4 0.000(1) 6_557 . . 2_665 ?
 C4 C4 C3 C2 180.000(1) 6_557 . . . ?
 C2 N2 C1 N1 -174.84(11) . . . . ?
 C2 N2 C1 N3 6.27(18) . . . . ?

_shelx_SHELXL_version_number      '2019/2'
loop_
  _refln_index_h
  _refln_index_k
  _refln_index_l
  _refln_F_squared_meas
  _refln_F_squared_sigma
 1 0 0 0.4 0.6
 -1 0 0 -0.2 0.5
 2 0 0 57.19 5.6
 -2 0 0 56.19 4.6
 -2 0 0 65.49 9
 2 0 0 63.19 5.7
 3 0 0 1.4 1.6
 -3 0 0 3 2.6
 3 0 0 -0.9 1.8
 -3 0 0 -0.5 2.8
 -3 0 0 -5.6 2.3
 3 0 0 -3.5 2.9
 4 0 0 2.7 3.1
 4 0 0 4.9 3.6
 -4 0 0 7.5 4.2
 0 1 0 0 0.3
 0 -1 0 0.1 0.3
 -1 1 0 26.1 8.6
 -2 1 0 2174.38 160.58
 -2 1 0 2609.04 161.28
 2 1 0 2093.89 159.98
 -2 1 0 2440.86 159.18
 -2 -1 0 2452.05 159.18
 -2 -1 0 2286.17 162.08
 -2 1 0 2289.37 165.08
 2 1 0 2543.15 159.78
 2 -1 0 2307.67 159.78
 2 -1 0 2664.33 160.08
 3 1 0 31.2 7.3
 -3 1 0 21 5.1
 3 -1 0 12.1 3.2
 3 1 0 19.7 4.5
 3 -1 0 16 4.3
 3 1 0 17.3 3.4
 -3 -1 0 10.8 3.4
 -3 -1 0 15.9 4
 -3 1 0 12.6 4.4
 -3 1 0 9.6 3.8
 3 -1 0 9.5 5
 -3 -1 0 11.3 4
 4 1 0 1.3 4.1
 4 1 0 10.2 5.3
 4 1 0 3.9 3.5
 4 -1 0 10.1 7.6
 -4 1 0 2.5 3.5
 4 -1 0 9.4 4.1
 -4 1 0 4.2 4.1
 4 -1 0 -3.6 2.5
 -4 1 0 8.8 3.8
 -1 2 0 9847.32 669.83
 1 -2 0 9999 671.23
 2 2 0 3874.51 253.77
 -2 2 0 3900.31 253.67
 -2 -2 0 3744.73 253.87
 -2 2 0 3614.14 250.97
 2 2 0 4019.8 251.87
 2 -2 0 3776.72 251.47
 -2 2 0 3580.64 252.87
 -2 -2 0 3684.33 252.07
 3 2 0 685.23 50.49
 -3 -2 0 683.03 50.99
 3 -2 0 731.73 51.49
 3 2 0 813.02 55.59
 -3 2 0 689.93 52.29
 3 2 0 732.73 51.59
 3 -2 0 751.02 51.29
 -3 2 0 716.63 52.69
 -3 2 0 713.43 52.79
 -3 -2 0 672.63 53.89
 -4 -2 0 1.4 3.2
 4 -2 0 6.2 3.9
 -4 2 0 -2.5 2.8
 4 2 0 1.3 4
 -4 2 0 -0.6 3.3
 4 2 0 -1.9 2.6
 -4 2 0 -1.2 3.2
 0 3 0 0.6 1.1
 -1 3 0 2299.77 153.58
 -2 3 0 6019.2 415.26
 -2 3 0 6265.87 413.66
 -2 3 0 6055.89 415.46
 2 -3 0 6214.68 413.76
 -2 3 0 5971.9 414.46
 -2 -3 0 6833.72 416.86
 -3 -3 0 812.52 59.49
 -3 3 0 816.82 57.69
 -3 3 0 814.22 57.59
 3 -3 0 780.02 55.89
 3 3 0 765.22 54.89
 3 -3 0 791.12 55.79
 3 3 0 735.13 58.99
 3 3 0 790.52 56.09
 -3 3 0 761.62 56.69
 4 3 0 5.8 3.6
 -4 3 0 -0.1 2.9
 -4 3 0 -1.8 2.9
 -4 3 0 4.4 3.1
 4 3 0 2.6 4.6
 4 -3 0 1.1 2.6
 -4 -3 0 4.4 3.4
 0 4 0 4047.5 278.67
 0 4 0 4078.49 280.37
 1 -4 0 23.8 2.6
 -1 4 0 21 3.3
 1 4 0 24 4
 -2 -4 0 2723.33 175.48
 2 4 0 2692.23 171.78
 2 4 0 2501.25 174.58
 -2 4 0 2691.23 173.98
 -2 4 0 2650.43 174.28
 2 -4 0 2708.03 172.78
 2 4 0 2264.87 172.38
 -2 4 0 2454.15 174.08
 2 -4 0 2545.85 172.28
 -2 4 0 2503.55 172.48
 3 -4 0 1800.42 121.59
 3 4 0 1819.62 125.59
 -3 4 0 1814.62 123.69
 3 4 0 1626.74 120.19
 3 4 0 1801.52 121.89
 -3 4 0 1867.21 123.69
 3 -4 0 1776.22 121.49
 -3 4 0 1745.83 122.59
 -3 -4 0 1734.73 125.09
 -4 4 0 1412.06 90.99
 -4 4 0 1316.97 89.89
 -4 4 0 1133.39 86.99
 -4 -4 0 1405.46 92.29
 4 4 0 1183.58 88.09
 4 4 0 1085.09 90.99
 0 -5 0 0.1 0.2
 0 5 0 0.3 1.3
 1 5 0 172.28 14.7
 -1 5 0 173.28 13.7
 1 5 0 167.78 13.6
 -1 5 0 164.88 13.7
 1 5 0 160.08 14.2
 2 5 0 68.09 6.2
 2 -5 0 69.09 7.3
 -2 5 0 70.59 7.4
 -2 5 0 83.39 8.4
 2 -5 0 81.69 7.4
 2 5 0 70.89 8.8
 -2 5 0 71.09 8.4
 2 5 0 85.59 7.5
 -2 -5 0 81.79 9.8
 -2 5 0 64.19 8.2
 -3 -5 0 1838.32 134.49
 -3 5 0 2120.39 138.09
 3 -5 0 2002.5 135.59
 3 5 0 2061.69 135.89
 3 5 0 1751.92 138.49
 -3 5 0 2121.79 137.79
 -3 5 0 1813.02 135.99
 -3 -5 0 2165.18 140.09
 -4 5 0 3.5 3.5
 4 5 0 1 3.1
 -4 5 0 5.8 3.3
 4 -5 0 4.9 3.6
 -4 -5 0 2.1 3.3
 -4 5 0 -3.7 4.1
 4 5 0 1.5 3.5
 0 6 0 132.29 11.4
 0 6 0 117.79 11.3
 1 6 0 158.98 12.2
 -1 6 0 139.79 12.3
 -1 6 0 129.79 12
 1 6 0 141.89 13
 -1 6 0 115.49 12
 -1 -6 0 128.39 11.9
 1 6 0 135.59 13.5
 1 -6 0 149.29 10.6
 -2 -6 0 96.59 11.5
 -2 6 0 99.79 11.2
 2 6 0 102.89 11.3
 -2 6 0 91.19 10.5
 2 6 0 104.39 9.4
 -2 6 0 108.09 10.1
 -2 6 0 99.39 11
 2 -6 0 105.19 9.4
 -3 -6 0 601.44 47
 3 6 0 550.84 45.8
 -3 6 0 573.54 44.4
 3 -6 0 545.55 42
 -3 6 0 580.84 44.5
 3 -6 0 593.94 42.7
 -4 6 0 2479.95 165.38
 4 -6 0 2319.57 164.78
 4 6 0 2462.85 167.28
 4 6 0 2575.94 164.98
 4 6 0 2303.97 168.28
 -4 6 0 2365.86 165.38
 0 7 0 2.2 1.9
 0 7 0 -0.7 1.7
 0 7 0 -0.1 1.7
 1 7 0 34.7 6.9
 -1 7 0 37.5 5.4
 -1 -7 0 23.4 4.9
 1 -7 0 28.2 3.3
 1 7 0 35 8.1
 -1 7 0 40.5 6.9
 -1 7 0 40.5 6.3
 1 7 0 37.2 5.9
 1 7 0 32.4 4.7
 -1 7 0 30.8 5.5
 -1 7 0 28 4.6
 -2 7 0 2074.39 144.89
 2 -7 0 2161.48 143.59
 2 7 0 1971.9 143.39
 2 7 0 2198.68 146.69
 -2 7 0 2096.29 145.89
 -2 7 0 2108.49 145.89
 -2 -7 0 2236.68 147.59
 -2 7 0 2157.58 145.99
 3 -7 0 1340.17 94.59
 -3 7 0 1460.25 97.29
 -3 7 0 1371.26 96.19
 -3 7 0 1456.65 97.19
 3 -7 0 1296.07 94.59
 3 7 0 1304.17 94.39
 -3 -7 0 1326.87 94.79
 -3 -7 0 1403.56 98.79
 3 7 0 1307.27 98.29
 -4 7 0 -3.3 2.8
 -4 7 0 0.1 2.5
 4 7 0 -1.9 1.8
 -4 -7 0 0.9 2.7
 4 7 0 -2 3.5
 0 8 0 406.06 34.5
 0 8 0 492.95 35
 0 8 0 505.55 38.6
 0 8 0 431.36 32.4
 1 8 0 828.42 55.39
 -1 8 0 687.23 55.19
 -1 8 0 665.83 51.99
 1 -8 0 728.33 50.09
 1 8 0 802.72 54.89
 1 8 0 777.12 52.29
 -1 8 0 664.63 53.29
 -1 8 0 725.73 53.59
 1 8 0 807.32 55.39
 -1 8 0 677.23 52.99
 -2 8 0 1145.79 83.69
 -2 8 0 1189.78 84.29
 -2 8 0 1165.18 84.39
 2 -8 0 1259.97 81.99
 2 8 0 1166.88 84.79
 -2 8 0 1250.17 84.69
 -2 -8 0 1136.79 85.59
 3 -8 0 1008.3 71.69
 -3 8 0 976 72.69
 3 8 0 1099.49 75.99
 -3 8 0 1008 73.49
 3 8 0 892.21 75.49
 -3 8 0 1077.89 73.99
 -3 -8 0 1089.19 76.19
 -3 -8 0 961.7 72.09
 0 9 0 2.5 3
 0 9 0 -1.4 2.6
 0 9 0 2.5 2.3
 0 9 0 3.3 2.9
 1 9 0 1989.4 128.89
 -1 9 0 1710.23 128.79
 -1 9 0 1891.61 130.49
 -1 9 0 2036.9 129.79
 1 9 0 1950.2 132.79
 -1 9 0 1966.3 131.29
 -1 9 0 1883.61 131.29
 1 9 0 1739.63 131.69
 1 9 0 1861.11 132.59
 2 9 0 1515.45 99.49
 2 -9 0 1417.76 92.59
 -2 9 0 1213.08 101.19
 -2 9 0 1341.07 99.39
 -2 9 0 1187.58 94.39
 -2 9 0 1399.46 96.29
 -3 9 0 93.89 11
 -3 -9 0 127.69 16.5
 -3 9 0 95.49 11.3
 3 9 0 80.59 12.5
 -3 9 0 78.69 11
 3 9 0 91.89 12.2
 0 10 0 6590.44 443.96
 0 10 0 6814.02 445.36
 0 10 0 6441.16 444.46
 1 10 0 1284.67 93.49
 -1 10 0 1195.28 85.89
 1 10 0 1200.88 84.49
 -1 10 0 1139.19 85.49
 1 10 0 1253.67 89.99
 1 10 0 1288.37 90.19
 -1 10 0 1324.17 89.09
 -1 10 0 1242.78 88.99
 2 10 0 208.08 21.9
 -2 10 0 243.68 21
 -2 10 0 210.68 20.5
 -2 10 0 217.28 19.9
 2 10 0 221.08 19.9
 -2 10 0 226.98 20.1
 3 10 0 28.4 6.6
 -3 10 0 31.1 5.9
 -3 10 0 23.9 6.3
 -3 10 0 17.7 5.5
 0 11 0 0.6 3.4
 0 11 0 -0.6 4.8
 -1 11 0 3057.49 199.48
 1 11 0 2852.51 199.48
 -1 11 0 2714.63 194.78
 -1 11 0 2880.91 198.08
 1 11 0 2929.31 200.68
 2 11 0 135.49 13.7
 -2 11 0 164.08 15
 -2 11 0 160.28 15.1
 -2 11 0 142.39 15.8
 2 11 0 157.38 17.8
 -3 11 0 21.9 5.1
 3 11 0 13.8 4.3
 3 11 0 22.9 5.4
 -3 11 0 25.7 6
 -3 11 0 28.1 5.3
 0 12 0 2420.46 169.88
 0 12 0 2333.27 171.48
 0 12 0 2616.24 170.68
 -1 12 0 788.12 58.89
 1 12 0 838.52 63.79
 1 12 0 871.61 68.99
 -1 12 0 855.71 62.79
 -1 12 0 849.12 64.19
 2 12 0 289.57 26.2
 -2 12 0 295.57 24.7
 -2 12 0 264.67 22.6
 -2 12 0 265.47 22.3
 0 13 0 -10.1 10.5
 0 13 0 -12.8 17.8
 1 13 0 600.94 51.49
 1 13 0 521.85 41.2
 -1 13 0 430.06 42.3
 -2 13 0 916.01 64.49
 -2 13 0 890.51 62.39
 2 13 0 872.91 66.09
 0 14 0 126.79 27
 1 14 0 510.15 38.2
 -1 14 0 485.05 40.4
 1 14 0 424.86 46.5
 1 0 -1 2058.49 144.59
 1 0 1 1626.54 142.99
 -1 0 -1 2063.29 146.09
 -1 0 1 1896.21 142.49
 2 0 -1 1.3 1.1
 2 0 -1 3.8 1.4
 -2 0 1 -0.4 0.8
 -2 0 1 -0.2 0.5
 -2 0 -1 0.6 1.7
 2 0 1 1.1 1.1
 -2 0 1 -2.6 1.6
 3 0 1 162.98 18.2
 -3 0 -1 154.98 19.5
 -3 0 1 204.98 17.2
 3 0 -1 186.38 15.5
 -3 0 1 190.78 17.8
 3 0 -1 180.58 15.8
 3 0 1 181.38 16.4
 3 0 1 198.38 15.8
 -3 0 1 175.98 16.3
 -3 0 -1 222.58 18.9
 -3 0 -1 205.28 16.6
 4 0 1 0.4 3.1
 4 0 -1 -7 5.5
 4 0 1 5.3 5.8
 -4 0 1 -3 2.9
 4 0 1 -3.4 2.8
 -4 0 1 5.5 4.3
 4 0 -1 -0.4 2.5
 4 0 -1 -4.1 3.7
 0 -1 -1 27.6 2.5
 0 -1 1 35.4 2.6
 0 -1 1 30.5 2.3
 0 -1 1 28.3 2.4
 -1 1 1 98.79 7.5
 1 -1 1 108.99 8
 -1 -1 -1 105.19 8
 1 1 1 117.69 7.9
 -1 1 -1 101.59 7.5
 2 1 -1 447.86 32.6
 -2 1 1 451.05 31.4
 -2 1 1 446.36 33.9
 -2 1 1 508.25 36.5
 2 -1 1 465.65 32.8
 -2 -1 -1 473.25 32.1
 -2 -1 -1 462.95 34.6
 -2 1 1 452.25 33.6
 2 1 -1 445.16 32.4
 2 -1 1 500.15 32.8
 -2 -1 1 493.65 34.8
 2 -1 -1 473.35 32.7
 -2 1 -1 544.65 32.6
 2 1 1 452.75 32.8
 -2 1 -1 483.45 34.2
 -2 1 -1 415.16 33.5
 2 1 1 431.66 34.5
 -2 1 -1 452.65 31.3
 -2 -1 1 458.75 31.8
 2 1 1 466.05 32.6
 2 -1 -1 469.65 32.5
 -2 1 -1 417.26 33.3
 3 -1 1 46.3 6
 -3 -1 -1 48.8 6.4
 -3 1 1 43.1 7.1
 -3 1 1 51.29 7.1
 -3 1 1 46.2 6.8
 3 -1 1 56.49 9.4
 3 -1 1 45.9 6.5
 -3 -1 -1 47.6 6.5
 3 1 -1 45.7 5.6
 -3 -1 -1 46.8 7.9
 3 1 -1 48.3 9.1
 3 1 -1 42.9 6
 -3 -1 1 36.5 6.2
 -3 1 -1 38.2 6.4
 3 1 1 48.8 6.9
 -3 -1 1 31.9 7.2
 3 1 1 43.9 5.7
 -3 1 -1 42.4 6.5
 -3 -1 1 45.6 6.6
 3 -1 -1 42.8 6
 3 1 1 35.2 7.9
 -3 1 -1 50.59 7.5
 3 -1 -1 51.59 6
 4 1 -1 33 6.9
 4 -1 1 46.3 8
 4 -1 1 48.1 8.7
 4 1 -1 31.5 7.5
 4 -1 1 49.6 11.8
 -4 1 1 30.2 6
 -4 1 1 48.9 7.4
 4 -1 -1 29.7 6.4
 4 1 1 23.6 7
 -4 1 -1 40.2 6.6
 -4 -1 1 22.9 6.4
 4 1 1 40.4 7.6
 -4 1 -1 51.59 7
 4 -1 -1 19.5 7.2
 0 -2 1 0 0.3
 0 2 -1 -0.3 0.8
 0 2 1 0 0.8
 1 2 -1 312.57 23.8
 1 -2 1 339.57 23.5
 -1 2 1 339.47 23.4
 -1 2 -1 336.87 23.1
 1 2 1 363.46 23.4
 -1 2 -1 349.47 23.8
 2 2 -1 122.39 9.5
 2 -2 1 123.09 9.9
 2 -2 1 133.09 10.1
 -2 2 1 113.59 8.8
 -2 -2 -1 117.09 9.7
 -2 2 1 133.09 11.4
 2 2 -1 110.69 11.3
 -2 2 1 115.79 11
 -2 2 1 105.09 11.2
 2 2 -1 109.09 9.7
 -2 -2 -1 124.59 11.9
 2 2 1 132.09 9.8
 -2 2 -1 132.69 10.9
 2 -2 -1 127.39 10
 -2 2 -1 134.59 9.8
 -2 -2 1 95.89 11.2
 2 2 1 96.39 14.3
 -2 2 -1 121.89 11.6
 2 2 1 113.79 10
 -2 2 -1 118.99 10.8
 2 -2 -1 105.79 9.4
 3 -2 1 0 1.7
 -3 2 1 1.2 2.5
 3 -2 1 -9.1 4.7
 3 -2 1 -4.6 2.2
 3 2 -1 7.7 4.1
 -3 2 1 6 3
 3 2 -1 -0.8 2.2
 -3 2 1 -0.6 2
 -3 -2 -1 1.8 2.5
 3 2 1 6.4 3.2
 -3 2 -1 -3.7 2
 3 2 1 1.2 1.7
 3 -2 -1 -0.6 2.1
 -3 2 -1 -0.7 2.2
 -3 -2 1 1.3 2.8
 -3 -2 1 1.4 2.9
 3 2 1 0.3 3.2
 3 -2 -1 -0.6 1.4
 -4 2 1 -3.7 2.9
 4 -2 1 3.9 3.7
 4 2 -1 5.1 5.1
 -4 2 1 1.4 2.7
 4 2 -1 1.7 2.8
 4 -2 -1 -0.9 2.6
 4 2 1 -5.5 3.7
 -4 2 -1 0.5 3.5
 -4 2 -1 -1.2 3.1
 -4 2 -1 5.5 3.2
 4 2 1 -3.8 3
 -4 -2 1 2.8 3.1
 0 3 -1 2614.34 177.18
 0 -3 -1 2493.95 169.98
 0 3 1 2575.14 170.68
 0 3 -1 2238.38 173.28
 1 -3 1 3355.86 241.58
 -1 3 1 3448.35 235.28
 1 3 -1 3945.21 254.57
 -1 -3 -1 3089.49 249.08
 1 3 1 3231.48 250.07
 -1 3 -1 3354.56 240.88
 -1 -3 1 3258.57 249.97
 1 -3 -1 3650.73 237.28
 -2 3 1 226.58 18.7
 -2 3 1 209.58 18.4
 2 3 -1 233.98 16.7
 -2 3 1 216.68 18.4
 2 3 -1 227.98 19
 2 3 -1 229.48 17.3
 2 -3 1 237.88 17.4
 -2 -3 -1 241.68 17.6
 -2 3 1 223.08 16.6
 2 -3 1 227.48 17.2
 -2 -3 -1 256.17 19.7
 -2 3 1 221.48 17.9
 2 3 1 247.18 17
 2 3 1 227.48 17.5
 2 3 1 224.68 19.2
 2 -3 -1 224.18 17.3
 -2 3 -1 222.88 17.2
 -2 3 -1 221.98 18.5
 2 -3 -1 218.88 16.9
 -2 3 -1 214.38 18.3
 -2 -3 1 247.98 19.9
 3 3 -1 18.3 5.9
 3 -3 1 4.7 2.4
 -3 -3 -1 12.1 4.9
 -3 3 1 13.5 4.8
 -3 3 1 4.6 3.9
 -3 3 1 7.5 3.4
 3 -3 1 7.2 3.3
 -3 -3 -1 4.2 2.3
 3 3 -1 11 3.6
 3 3 -1 11.8 2.6
 3 3 1 12.8 6
 3 3 1 15.8 3.5
 3 -3 -1 10.2 3.3
 3 -3 -1 9.3 3.2
 -3 3 -1 11.6 3.8
 3 3 1 5 3.2
 -3 3 -1 13.8 4.5
 -3 -3 1 12.8 5
 -3 3 -1 15.2 5
 4 3 -1 184.48 19.4
 -4 3 1 185.88 17.1
 4 -3 1 169.28 16.8
 -4 -3 -1 164.48 18.3
 -4 3 1 179.98 16.6
 4 3 -1 182.08 16.6
 -4 3 -1 158.18 15.7
 -4 -3 1 159.18 18.5
 -4 3 -1 169.28 16.2
 4 3 1 154.08 16.4
 4 -3 -1 182.18 16.7
 -4 3 -1 168.68 16.1
 4 3 1 176.68 20
 0 -4 1 0.3 0.3
 0 4 -1 -0.8 1.1
 0 4 1 -0.9 1.1
 1 4 -1 136.89 10.4
 -1 4 1 116.09 9.6
 1 4 -1 110.29 8.1
 1 -4 1 117.49 8.9
 1 4 1 117.49 10.6
 -1 4 -1 119.09 9.9
 1 4 1 109.19 8.5
 -2 4 1 108.09 11.3
 2 4 -1 135.09 10.8
 2 4 -1 126.79 9.9
 2 -4 1 130.59 10.9
 2 4 -1 135.59 12.6
 -2 4 1 124.69 12.3
 -2 4 1 128.59 10.4
 2 -4 1 129.19 10.8
 -2 -4 -1 125.49 12.7
 -2 4 1 116.69 11.8
 -2 4 -1 122.39 10.9
 2 4 1 137.89 12.9
 2 4 1 146.89 11.4
 -2 -4 1 125.79 12.9
 2 -4 -1 124.79 10.7
 -2 4 -1 130.29 12
 2 -4 -1 132.09 10.4
 -2 4 -1 131.09 12.2
 -2 4 -1 127.49 12
 3 4 -1 365.66 28.2
 3 4 -1 347.97 31
 -3 -4 -1 321.27 26.7
 -3 4 1 352.56 29.8
 -3 4 1 363.16 29.8
 3 -4 1 421.96 28.9
 3 -4 1 350.56 27.8
 3 4 -1 370.76 26.9
 -3 4 1 325.27 28
 -3 -4 -1 359.36 31
 -3 4 -1 375.26 29.9
 3 -4 -1 377.96 27.9
 3 4 1 385.66 28.7
 3 4 1 377.06 31.8
 3 -4 -1 383.46 28.1
 -3 4 -1 395.66 29.8
 -3 4 -1 361.76 29.2
 -3 -4 1 343.27 31.2
 3 4 1 322.47 26.8
 4 4 -1 11.9 4.3
 -4 4 1 2.9 3.8
 -4 4 1 11.6 5.6
 -4 -4 -1 10.3 4.6
 4 4 -1 19.5 7.1
 4 -4 1 7.9 6.8
 -4 4 -1 14 5.6
 4 4 1 7.8 4.3
 4 4 1 12.6 6
 -4 -4 1 11 5
 -4 4 -1 12.4 4.4
 0 5 1 387.26 26.1
 0 5 -1 315.87 25.5
 -1 5 1 13.7 3.1
 1 5 -1 9.2 2.7
 -1 5 1 10.1 2.6
 -1 5 1 6.7 2.7
 1 5 -1 13 4
 1 5 -1 12.1 3.2
 -1 5 -1 11.3 2.7
 1 5 1 11.3 3.2
 -1 5 -1 10.7 2.8
 1 5 1 11.4 6
 1 5 1 11.3 2.8
 -1 5 -1 9.4 2.3
 -2 5 1 136.49 13
 2 5 -1 136.29 11.3
 -2 5 1 145.59 13.1
 -2 5 1 125.79 12.7
 -2 5 1 131.39 12.4
 -2 5 1 128.69 11.2
 2 -5 1 131.69 11.2
 -2 -5 -1 127.69 13.5
 2 5 -1 153.78 13.4
 2 5 -1 128.59 10
 2 5 1 135.89 11.7
 -2 5 -1 128.29 12.3
 -2 5 -1 125.99 12.6
 -2 5 -1 129.99 12.6
 -2 5 -1 127.19 11.6
 -2 -5 1 159.28 14.3
 2 -5 -1 133.69 11.2
 2 -5 -1 127.19 10.9
 2 5 1 122.79 12.9
 2 5 1 127.89 11.3
 -3 -5 -1 0.3 2.7
 3 5 -1 -1.4 2.6
 -3 5 1 -0.6 3.2
 -3 -5 -1 -1.6 3.1
 -3 5 1 -0.7 2.6
 3 5 -1 1.7 2.8
 3 -5 1 3.8 3.2
 -3 5 1 -1.6 1.7
 -3 -5 1 0.5 3.7
 3 -5 -1 0.5 3.1
 -3 -5 1 1.9 2.8
 -3 5 -1 -2.4 1.9
 3 5 1 -1.6 2.5
 3 5 1 8 4.8
 3 -5 -1 -1.1 2.6
 -3 5 -1 -1 2.5
 -3 5 -1 4 2.8
 -4 5 1 69.49 9.5
 -4 -5 -1 82.19 11.4
 4 5 -1 67.79 11.3
 4 -5 1 65.69 9.6
 -4 5 1 78.59 9.9
 4 5 -1 70.79 9.4
 -4 -5 1 69.79 10.8
 4 5 1 68.39 11.2
 -4 5 -1 56.39 8.8
 4 -5 -1 79.19 9.1
 4 5 1 70.79 9.8
 -4 5 -1 71.09 9.5
 4 5 1 65.49 9.5
 -4 5 -1 73.79 9.3
 0 6 -1 0 1.4
 0 6 1 1.2 1.8
 0 6 1 0.1 1.5
 0 6 -1 -0.2 1.6
 1 -6 1 60.99 5.3
 -1 6 1 60.99 6.8
 -1 6 1 52.99 6.8
 -1 6 1 58.59 6.9
 1 6 -1 56.29 7.1
 1 6 -1 58.49 6.2
 1 6 -1 56.09 7.7
 -1 6 1 59.19 6.9
 -1 6 -1 55.49 7.1
 -1 -6 1 39.4 9.5
 1 6 1 75.09 11.4
 -1 6 -1 70.09 7.2
 1 6 1 68.39 7.9
 -1 6 -1 62.99 6.8
 1 -6 -1 66.29 5.4
 1 6 1 46.9 6.1
 -1 6 -1 60.39 6.6
 -2 6 1 1.1 1.9
 -2 6 1 -0.5 2.6
 2 6 -1 1.9 2.1
 -2 6 1 2.3 3.3
 2 -6 1 0.4 1.1
 2 -6 1 -4.9 2.9
 2 6 -1 1.1 2.2
 -2 -6 -1 4.5 3.4
 -2 6 1 -1.3 2
 2 -6 -1 1.1 1.3
 -2 6 -1 0.3 2.2
 -2 6 -1 -0.7 2
 -2 6 -1 1.7 1.6
 -2 -6 1 -3.8 2.6
 2 6 1 2.5 2.6
 -2 6 -1 2.2 2.2
 -3 6 1 277.07 23.3
 3 6 -1 256.67 25.1
 3 6 -1 274.07 27.4
 -3 -6 -1 275.47 25.9
 -3 6 1 259.87 24
 3 -6 1 296.07 24.1
 -3 6 1 289.17 24.8
 3 -6 1 271.47 22.1
 -3 -6 -1 242.68 21.9
 3 -6 -1 291.17 22.2
 -3 6 -1 272.67 23.9
 3 6 1 276.67 25.7
 -3 -6 1 257.67 25.2
 3 -6 -1 268.07 21.9
 -3 6 -1 261.67 24.9
 -3 6 -1 252.27 23.6
 -4 6 1 3 3.3
 4 6 -1 6.4 4.8
 -4 6 1 -1.8 2.9
 4 -6 1 -0.3 4
 4 6 -1 3.6 3.4
 4 6 -1 4.4 3
 4 6 1 3.5 5.3
 -4 6 -1 10.1 3.9
 4 6 1 7.4 3.9
 -4 6 -1 1 3.6
 -4 -6 1 5 4.4
 4 6 1 -7.1 3.3
 4 -6 -1 1.5 3.7
 -4 6 -1 4.2 3.6
 0 7 -1 39.4 6.5
 0 7 1 25.4 5.4
 0 7 -1 32.4 4.1
 0 7 1 32.8 5.5
 0 7 -1 32.5 5.2
 0 7 1 23.9 5
 0 7 -1 28.7 4.9
 -1 7 1 1561.74 103.79
 1 7 -1 1587.74 102.99
 -1 7 1 1392.96 102.69
 1 7 -1 1434.56 103.69
 -1 7 1 1514.75 103.69
 1 -7 1 1521.85 101.09
 -1 7 1 1522.65 106.19
 1 7 -1 1611.04 104.59
 -1 7 1 1563.34 103.29
 1 7 1 1458.15 104.59
 -1 7 -1 1647.14 104.19
 -1 7 -1 1344.87 102.59
 -1 7 -1 1465.45 102.99
 -1 -7 1 1672.03 103.69
 1 7 1 1519.35 105.09
 -1 7 -1 1518.55 103.99
 1 7 1 1489.45 102.79
 1 -7 -1 1347.57 100.89
 1 7 1 1415.96 104.49
 -2 7 1 81.19 9.6
 2 7 -1 64.89 8.9
 2 7 -1 68.49 7.8
 2 -7 1 65.29 7.1
 -2 7 1 76.29 8.3
 -2 7 1 65.49 9.6
 -2 7 1 72.99 9.2
 -2 -7 -1 66.29 10
 -2 7 1 66.49 8.9
 2 7 1 56.79 8.1
 -2 7 -1 69.29 8.9
 2 -7 -1 73.59 7.3
 -2 7 -1 77.59 9.7
 -2 7 -1 73.79 9.2
 -2 -7 1 63.79 10.3
 -2 7 -1 77.39 8.8
 2 7 1 67.29 9.3
 -3 7 1 62.49 8.5
 -3 -7 -1 48.4 7.9
 -3 7 1 81.19 10.2
 3 -7 1 59.89 9.1
 3 7 -1 63.59 8.5
 3 7 -1 66.69 10.8
 -3 7 1 63.39 9.5
 -3 -7 -1 44.1 9.7
 3 -7 1 62.29 7.9
 3 7 1 59.49 12
 3 7 1 48.6 8.5
 -3 7 -1 55.09 9
 3 -7 -1 68.99 8.8
 -3 -7 1 69.69 13.2
 -3 7 -1 61.29 9
 -3 7 -1 60.89 9.1
 3 -7 -1 46.4 7.2
 -3 -7 1 54.69 8.3
 -4 7 1 51.29 7.3
 4 7 -1 51.99 8.8
 4 7 -1 28.5 6.6
 -4 7 1 54.39 7.6
 4 7 -1 29.2 6.7
 -4 -7 1 47.6 7.8
 -4 7 -1 46.3 6.7
 4 7 1 42.5 7.3
 -4 7 -1 38.3 7.3
 -4 7 -1 48.9 7.3
 4 7 1 34.5 7.8
 0 8 -1 -0.8 1.8
 0 -8 1 2.1 3.4
 0 8 -1 0.4 1.9
 0 8 1 -1.6 1.7
 0 8 1 -1.3 2.8
 0 8 1 2 2.2
 0 8 1 1.2 2.6
 0 8 -1 3.4 1.9
 1 8 -1 81.39 11.3
 1 8 -1 71.79 10
 1 -8 1 91.19 7.4
 1 8 -1 85.89 12.8
 -1 8 1 81.99 9.1
 -1 8 1 82.19 10.2
 -1 8 1 92.39 10.3
 -1 8 1 85.59 10.5
 1 8 -1 106.79 9.4
 -1 8 1 68.99 8.9
 -1 8 -1 99.89 10.7
 -1 8 -1 86.99 9.6
 1 8 1 89.49 11
 1 8 1 92.79 11.2
 -1 8 -1 80.99 9.2
 1 8 1 86.59 16
 -1 -8 1 80.59 9.1
 1 -8 -1 91.59 7.4
 1 8 1 100.09 9.3
 -1 8 -1 91.39 10.2
 -2 8 1 90.69 10.5
 2 -8 1 95.99 9.2
 -2 -8 -1 94.39 12.7
 -2 8 1 91.29 10.8
 -2 8 1 92.79 11.1
 2 8 -1 98.99 11.5
 -2 8 1 96.79 11
 -2 -8 1 110.49 12.8
 -2 8 -1 97.09 11.6
 2 -8 -1 81.59 8.6
 -2 8 -1 80.69 10.3
 -2 8 -1 93.29 10.9
 2 8 1 99.59 11.7
 2 8 1 90.09 12.4
 -2 8 -1 91.89 10.8
 -3 8 1 3 3.6
 -3 -8 -1 2.5 3.9
 -3 -8 -1 -7.9 4.7
 -3 8 1 0.3 2.8
 3 8 -1 1.2 3.3
 -3 8 1 -1.2 3.4
 3 -8 1 -4.1 3.3
 -3 8 -1 -4.9 2.7
 3 8 1 5.4 4.8
 3 -8 -1 2.9 3.6
 -3 8 -1 7.6 3.4
 -3 -8 1 -4.6 4.1
 -3 -8 1 -0.2 4.8
 -3 8 -1 -0.5 3.3
 3 8 1 2.1 2.8
 0 9 -1 141.59 13.9
 0 9 -1 138.49 14
 0 9 1 122.29 10.9
 0 9 1 133.79 13.8
 0 9 -1 134.29 13.2
 0 9 -1 126.99 11.1
 0 9 1 120.39 13.7
 0 9 1 101.19 13
 0 -9 1 121.59 12
 -1 9 1 13.7 3.8
 1 9 -1 15.1 3.8
 -1 9 1 18 4.6
 1 9 -1 3.3 9.6
 -1 9 1 11.5 6.1
 -1 9 1 12.8 5.1
 1 9 -1 5.9 3.5
 -1 9 1 18.5 5.2
 1 9 -1 10.8 4
 1 9 1 13.5 18.7
 1 9 1 26.5 6.7
 -1 9 -1 19.7 4.7
 -1 9 -1 13.1 3.9
 -1 9 -1 19.5 6
 -1 -9 1 12.4 4
 1 9 1 9.2 4.6
 -1 9 -1 13.5 4.8
 1 9 1 13.8 3.5
 -2 9 1 10.7 5.8
 -2 9 1 4.3 3.3
 2 9 -1 11 4.8
 -2 9 1 9.1 3.8
 2 -9 1 8.5 3.3
 2 9 -1 8.4 5.9
 2 9 1 2.5 3.7
 -2 9 -1 10.1 6.5
 2 -9 -1 13.2 3.4
 -2 9 -1 4.5 3.4
 -3 9 1 82.99 10.7
 -3 9 1 78.19 10.9
 3 9 -1 100.59 12.4
 -3 -9 -1 88.79 14
 3 9 -1 91.69 12.4
 -3 9 -1 72.29 10.3
 -3 9 -1 73.39 10.3
 -3 9 -1 81.59 10.5
 -3 -9 1 95.29 15.2
 3 9 1 78.29 11.7
 3 9 1 88.59 12.5
 0 10 1 -1.3 3.3
 0 10 -1 3.9 3.8
 0 10 1 0 2.6
 0 10 1 5.6 4.8
 0 10 -1 2.9 4.1
 0 10 -1 -3.8 2.7
 1 10 -1 168.38 14
 -1 10 1 157.58 14.7
 -1 10 1 139.99 16.1
 1 10 -1 186.48 18.2
 -1 10 1 148.39 16.7
 -1 10 1 182.28 17.4
 -1 10 1 158.18 14.7
 1 10 -1 211.48 19
 1 10 -1 159.38 25.3
 1 10 1 182.88 18.6
 -1 10 -1 143.79 14.5
 -1 10 -1 188.18 17.7
 -1 10 -1 159.38 16.9
 -1 10 -1 163.18 15.1
 1 10 1 163.38 27.4
 2 10 -1 25.6 7.1
 2 10 -1 30.6 6.7
 -2 10 1 46.4 8.8
 -2 10 1 27.2 6.2
 -2 10 1 43.2 8
 -2 10 1 28.9 7.7
 -2 -10 -1 25.5 6.7
 -2 10 -1 28.9 6.9
 -2 10 -1 37.6 8.5
 -2 10 -1 47.5 8.6
 -2 10 -1 26.1 7.4
 2 10 1 26.2 6
 2 10 1 27.1 8.5
 -3 10 1 32.9 6.6
 3 10 -1 31.1 7.3
 -3 10 1 20.7 5
 3 10 -1 32.8 8.5
 -3 10 1 30.8 6
 3 10 1 26 7.2
 3 10 1 41 8.5
 -3 -10 1 19.6 7.4
 -3 10 -1 26 5.6
 -3 10 -1 22.9 5.3
 -3 10 -1 41.2 8.3
 0 11 1 48.5 9.7
 0 11 1 59.29 10.2
 0 11 -1 60.89 9.3
 0 11 -1 46.7 10.3
 0 11 1 71.69 12.8
 0 11 -1 65.99 10.6
 -1 11 1 82.29 11.5
 -1 11 1 81.19 11.7
 1 11 -1 86.99 12
 -1 11 1 73.99 9.1
 1 11 -1 76.49 26.5
 1 11 1 93.09 13
 -1 11 -1 65.89 11.3
 1 11 1 97.59 23
 -1 11 -1 76.19 11.3
 -1 11 -1 84.99 9.6
 -2 11 1 52.89 7.7
 2 11 -1 46.4 9.5
 2 11 -1 42.6 6.9
 -2 11 1 50.49 8.4
 -2 11 1 45.1 8.5
 2 11 1 46.9 7
 -2 11 -1 44.1 8.7
 2 11 1 53.79 11.4
 -2 11 -1 48.3 7.8
 -2 11 -1 50.29 8.7
 -3 11 1 0.8 3.1
 3 11 -1 -1.9 2.3
 3 11 -1 4.4 3.2
 -3 11 1 2.3 2.8
 -3 11 1 -6.5 4.2
 3 11 1 5.4 3.3
 -3 11 -1 4.3 3
 3 11 1 -0.8 2.9
 0 12 -1 -1.6 4
 0 12 1 -0.3 5.6
 0 12 -1 -2.4 7.6
 0 12 -1 0.4 4.1
 0 12 1 2.3 3.5
 0 12 1 4.9 11.4
 1 12 -1 31.8 7
 -1 12 1 64.39 11.2
 1 12 -1 18.3 17.9
 -1 12 1 41.4 7
 -1 12 1 52.89 10.1
 -1 12 -1 31 7.9
 -1 12 -1 41.6 7
 1 12 1 36.6 8.6
 1 12 1 59.59 21.4
 -1 12 -1 62.09 11.1
 -2 12 1 25.4 5.6
 -2 12 1 27.9 6.5
 2 12 -1 22.7 5.8
 -2 12 1 19.6 4.6
 2 12 1 34.9 8.4
 -2 12 -1 23.1 5.3
 -2 12 -1 16.9 5.2
 0 13 -1 243.98 29.7
 0 13 1 195.68 22.7
 0 13 1 329.27 39.2
 1 13 -1 9.3 18.5
 1 13 -1 2.6 4.6
 -1 13 1 0.5 8.3
 1 13 1 -3 4.1
 -1 13 -1 -2.3 5.6
 1 13 1 7.7 19.8
 2 13 -1 31.1 7
 -2 13 1 26.5 5.2
 -2 13 1 31.9 6.7
 -2 13 -1 28.5 6.2
 2 13 1 32.8 8
 -2 13 -1 25.2 6.2
 0 14 -1 -3 19.8
 0 14 1 -4.6 18.4
 -1 14 1 8.6 15
 1 14 -1 4.1 6
 1 14 -1 11.7 17.9
 -1 14 -1 1.3 7.3
 0 0 -2 2510.55 187.78
 0 0 2 2924.41 188.98
 1 0 2 -0.1 0.8
 -1 0 -2 0 0.8
 -2 0 -2 811.02 63.19
 2 0 2 954 61.99
 -2 0 2 874.41 63.39
 -2 0 2 1034.8 63.89
 2 0 2 882.21 62.09
 -2 0 -2 880.91 61.09
 -3 0 -2 2.1 2.6
 3 0 2 -0.5 1.7
 -3 0 -2 0.9 1.7
 -3 0 2 7.3 3.1
 3 0 2 -0.1 2.1
 3 0 -2 2 5.1
 -3 0 -2 0.9 2.4
 3 0 -2 1.3 2.1
 -3 0 2 2.2 3.2
 3 0 2 0.3 3.2
 3 0 -2 0.7 1.2
 -3 0 2 0.6 2.8
 -3 0 -2 -1.4 2.1
 4 0 -2 44.4 7
 4 0 -2 31.9 8.1
 4 0 2 44 8.4
 -4 0 2 27 6.3
 4 0 2 51.09 7.9
 -4 0 2 56.49 7.8
 0 -1 -2 0.2 0.6
 0 1 -2 1 0.6
 0 -1 2 0.2 0.6
 0 1 -2 -0.2 0.5
 -1 -1 -2 2794.52 195.68
 -1 1 2 2593.64 186.88
 1 1 -2 2490.15 192.38
 1 -1 2 2408.76 191.18
 1 1 2 2547.15 193.98
 -1 1 -2 2614.94 192.18
 -1 -1 2 2648.54 192.38
 1 -1 -2 2678.13 188.38
 2 1 -2 68.09 6.5
 -2 1 2 67.09 7.5
 2 -1 2 74.09 6.8
 -2 1 2 71.19 7.5
 -2 -1 -2 74.99 6.4
 2 1 -2 70.79 6.5
 -2 -1 -2 88.09 8.5
 -2 -1 2 72.89 5.9
 2 1 2 79.99 8.8
 -2 -1 2 70.39 7.9
 -2 1 -2 62.89 7.1
 2 -1 -2 66.59 6.3
 -2 1 -2 73.89 6.7
 -2 1 -2 71.79 5.8
 2 1 2 71.09 7
 -2 -1 2 77.59 8.5
 -2 1 -2 81.79 8.2
 2 1 2 75.29 6.7
 -3 -1 -2 2.6 3
 -3 -1 -2 0.9 1.6
 -3 1 2 1 2
 3 1 -2 0.4 1.4
 3 1 -2 1.9 2.2
 -3 -1 -2 8.8 3.5
 3 -1 2 3.2 1.9
 3 -1 2 -0.6 6
 3 -1 2 2.2 2.5
 -3 1 2 0.3 3.2
 3 1 -2 6.7 3.3
 -3 -1 -2 -0.1 3.2
 -3 1 2 2.6 2.5
 3 1 2 4.8 4.8
 3 -1 -2 5 3.8
 3 1 2 1.7 1.8
 -3 -1 2 6.2 3.3
 3 -1 -2 1 1.6
 3 1 2 5.7 3.1
 -3 1 -2 2.8 2
 3 -1 -2 -0.7 1.9
 -3 1 -2 -4.5 2
 -3 1 -2 4.2 2.5
 -3 -1 2 0.1 3
 -3 -1 2 0.1 2.8
 4 -1 2 90.19 16.6
 4 -1 2 109.39 12.3
 -4 1 2 91.49 10
 4 1 -2 108.79 14.2
 -4 1 2 96.89 11.2
 4 1 -2 96.09 10.9
 -4 1 -2 87.09 12.3
 4 1 2 76.39 10.5
 -4 1 -2 79.39 10.4
 4 -1 -2 107.29 11.2
 -4 -1 2 69.09 10.3
 -4 -1 2 107.99 12.7
 4 1 2 72.89 13.4
 0 2 -2 139.29 9.3
 0 2 2 132.99 10
 0 2 -2 139.39 9.7
 0 -2 2 111.69 9.1
 -1 2 2 3349.26 244.88
 1 -2 2 3513.05 252.57
 -1 -2 -2 3696.93 257.67
 1 2 -2 3267.87 255.27
 -1 -2 2 4136.79 260.37
 1 -2 -2 3731.73 250.47
 -1 2 -2 3510.75 252.17
 1 2 2 2945.71 253.47
 2 2 -2 418.46 29.5
 -2 2 2 405.96 30.5
 2 2 -2 455.55 29.3
 -2 2 2 420.06 31.3
 -2 -2 -2 434.76 31.8
 2 2 -2 467.55 33.7
 2 -2 2 433.86 29.8
 -2 -2 -2 433.86 29.6
 -2 2 2 400.76 30.8
 2 2 2 443.96 30.1
 -2 2 -2 395.66 29.6
 2 2 2 415.86 31.9
 -2 2 -2 432.26 30.8
 -2 -2 2 390.66 31.6
 2 2 2 409.16 29.4
 -2 2 -2 365.36 31
 2 -2 -2 382.06 29.1
 -2 2 -2 390.26 28.3
 3 2 -2 72.59 10.5
 -3 2 2 73.79 9.3
 3 2 -2 77.49 7.8
 -3 -2 -2 78.29 10.9
 -3 2 2 52.69 8.4
 3 -2 2 78.99 9
 3 -2 2 76.69 8.4
 -3 2 2 79.99 10.1
 3 -2 2 79.29 12.3
 -3 2 2 79.89 9.4
 3 2 -2 87.69 8.8
 -3 2 -2 79.29 9
 3 2 2 64.99 10.6
 3 -2 -2 80.59 8.3
 -3 -2 2 81.49 9.4
 -3 -2 2 91.19 11.3
 -3 2 -2 78.49 9.1
 3 2 2 82.79 9.1
 3 2 2 72.49 8
 3 -2 -2 78.29 8.3
 -4 2 2 7 4.1
 4 2 -2 8.1 4.1
 4 -2 2 1.6 3.7
 -4 2 2 5.6 3.7
 4 2 -2 18.8 6.6
 -4 2 -2 13 4.6
 -4 -2 2 8.6 4.1
 -4 2 -2 7.8 3.7
 4 2 2 6.3 4.2
 4 2 2 -1 3.2
 4 2 2 16.2 7.5
 4 -2 -2 6.6 3.7
 0 3 -2 1.1 0.5
 0 -3 2 -0.2 0.5
 0 3 -2 -0.8 1
 0 3 2 2.6 1.4
 -1 3 2 2.3 1.1
 1 3 -2 2 1.4
 1 -3 2 2.3 1.2
 1 -3 -2 2.7 0.6
 -1 3 -2 4 1.7
 1 3 2 3.5 1.1
 2 3 -2 336.97 24.4
 2 3 -2 342.77 23.9
 2 -3 2 379.26 24.9
 -2 -3 -2 324.17 24.7
 -2 3 2 298.87 25.8
 2 -3 2 361.06 25.5
 -2 3 2 304.17 25.3
 -2 3 2 309.77 23.2
 -2 3 2 332.27 26
 2 3 -2 352.06 26.4
 2 3 2 321.77 26.6
 2 3 2 364.56 24.4
 -2 3 -2 323.27 25.6
 -2 -3 2 390.96 27.6
 2 -3 -2 311.87 23.9
 2 3 2 363.96 25
 -2 3 -2 329.17 24.7
 -2 3 -2 330.07 25.8
 -3 3 2 74.99 9.5
 -3 3 2 58.59 8.3
 3 3 -2 69.49 7.2
 -3 3 2 74.39 9.8
 3 3 -2 75.99 8.3
 3 3 -2 78.59 10.6
 -3 3 2 71.29 8.2
 3 -3 2 67.99 8.1
 -3 -3 -2 69.49 10
 3 -3 2 72.89 8.6
 -3 -3 2 78.09 11
 -3 3 -2 71.59 9.1
 3 -3 -2 76.09 8
 -3 -3 2 70.39 8.6
 3 -3 -2 73.19 8
 3 3 2 65.59 10.7
 -3 3 -2 65.79 8.7
 3 3 2 61.59 7.4
 3 3 2 75.49 8.8
 4 3 -2 214.78 19.4
 -4 3 2 227.18 19.8
 -4 3 2 193.28 19.7
 4 -3 2 230.18 20.6
 4 3 -2 233.38 23.2
 4 3 2 177.88 22
 -4 3 -2 258.77 21.1
 -4 3 -2 215.18 19.7
 -4 -3 2 244.48 22.8
 4 -3 -2 230.48 19.8
 4 3 2 230.68 20.6
 -4 3 -2 214.68 19.6
 4 3 2 232.18 23.8
 0 4 -2 133.39 11.1
 0 4 2 151.28 11.6
 0 -4 2 134.99 9.7
 -1 4 2 56.99 5.5
 1 4 -2 61.39 5.9
 1 4 -2 49.1 4.2
 1 -4 2 53.69 4.8
 1 4 2 51.09 4.6
 -1 4 -2 55.09 5.6
 -2 -4 -2 239.08 18.5
 -2 4 2 207.48 18.3
 2 -4 2 242.48 18.1
 2 4 -2 235.28 17
 2 4 -2 257.27 18
 -2 4 2 215.38 17.1
 -2 4 2 217.38 19.5
 2 -4 2 243.98 18.4
 -2 -4 -2 244.38 20.3
 -2 4 2 214.58 19.3
 -2 4 2 243.08 19.8
 2 4 -2 207.38 19.3
 -2 -4 2 236.38 20.6
 2 -4 -2 253.17 18.2
 -2 4 -2 228.18 19.2
 -2 4 -2 250.77 18.5
 2 4 2 229.08 17.5
 2 4 2 269.97 20.8
 -2 4 -2 227.98 19.1
 -2 4 -2 248.08 19.6
 2 4 2 238.98 18.3
 2 -4 -2 226.38 17.5
 3 4 -2 291.27 25
 -3 4 2 289.67 23.8
 -3 -4 -2 218.58 23.6
 3 -4 2 252.67 21.5
 3 -4 2 285.07 22.7
 -3 -4 -2 259.87 20.8
 -3 4 2 251.07 23.3
 3 4 -2 245.98 20.2
 3 4 -2 288.77 22
 -3 4 2 262.57 21.9
 3 -4 -2 264.87 21.4
 -3 -4 2 255.27 24.6
 3 4 2 290.27 22.6
 -3 4 -2 272.37 22.9
 3 4 2 262.87 25.1
 3 -4 -2 279.27 21.4
 -3 4 -2 273.07 23.1
 3 4 2 267.37 21.1
 -3 4 -2 275.47 23.4
 4 4 -2 151.88 19.4
 -4 4 2 84.79 14.1
 4 4 -2 115.89 12.6
 -4 4 2 149.88 15.7
 4 4 2 98.69 12.4
 -4 4 -2 130.99 13.7
 -4 4 -2 116.19 13.3
 -4 -4 2 122.79 15
 4 4 2 103.59 14
 4 4 2 159.08 17.7
 0 5 -2 0.4 1.4
 0 5 2 -2 1.1
 1 5 -2 499.25 37.1
 -1 5 2 516.85 37
 -1 5 2 516.75 37.4
 -1 5 2 480.55 37.2
 1 -5 2 570.04 36
 1 5 -2 517.45 37.6
 -1 5 -2 532.15 37.4
 1 5 2 528.45 37.4
 -1 5 -2 502.85 37.6
 -1 -5 2 538.75 37.8
 -1 5 -2 523.65 37.2
 1 5 2 510.25 38.3
 -1 5 -2 524.15 37.4
 -2 5 2 22.7 5.3
 -2 5 2 19.8 5.1
 2 5 -2 22.8 2.7
 2 5 -2 24.3 3.7
 -2 -5 -2 20.6 5.7
 -2 5 2 21.1 3.4
 2 -5 2 22 3.6
 -2 5 2 25.3 5.6
 2 5 -2 27.4 4.6
 2 -5 2 34.5 4.8
 -2 -5 -2 24.2 4.1
 2 5 2 21.5 5.4
 -2 5 -2 16.2 4.4
 2 5 2 30.8 4.4
 -2 5 -2 15.9 4
 -2 5 -2 24.3 4.1
 2 -5 -2 30 3.9
 -2 5 -2 24.5 5.3
 2 -5 -2 24.8 4.1
 -2 -5 2 21 5.7
 2 5 2 21.4 3.3
 3 5 -2 109.39 13
 3 5 -2 103.89 10.6
 -3 -5 -2 85.29 9.7
 3 -5 2 115.59 11.4
 -3 5 2 101.69 12.1
 -3 5 2 112.99 12.8
 -3 -5 -2 90.09 12.4
 -3 5 2 103.89 10.7
 3 -5 2 102.39 10.6
 3 -5 -2 108.59 10.2
 -3 5 -2 90.09 11.3
 3 5 2 102.69 13.7
 -3 5 -2 96.49 11.7
 3 5 2 89.39 10.6
 -3 5 -2 93.19 11.3
 3 -5 -2 94.19 9.8
 -3 -5 2 78.29 12.6
 4 5 -2 1.7 3.9
 -4 5 2 3.1 2.8
 4 5 -2 3.5 3.3
 4 -5 2 -6 3.1
 -4 5 2 -3.3 2
 -4 5 -2 -3.8 2.9
 4 5 2 -3 3.1
 4 5 2 7.2 5.1
 4 -5 -2 1.7 2.8
 -4 -5 2 0.4 3.5
 4 5 2 4 3.4
 -4 5 -2 -3.2 2.3
 -4 5 -2 3.5 3.6
 0 6 2 47.8 5.6
 0 6 -2 45.5 5.8
 0 6 2 32.8 5.5
 0 6 -2 34.9 5.3
 0 6 2 36.4 5.4
 -1 6 2 227.28 19
 -1 6 2 243.18 19.2
 1 6 -2 230.88 19.4
 1 6 -2 256.77 19.2
 -1 6 2 212.48 22.2
 -1 6 2 234.08 20
 1 6 -2 256.77 19.8
 1 -6 2 243.98 17.6
 1 6 2 243.48 20.5
 1 6 2 274.07 21.1
 -1 6 -2 229.68 18.9
 1 6 2 238.38 22.9
 -1 6 -2 281.17 20.2
 -1 6 -2 234.78 19
 -1 -6 2 249.78 19.6
 -1 6 -2 263.17 19.7
 1 6 2 200.58 18.6
 -2 6 2 132.19 11.3
 2 -6 2 134.99 12.1
 -2 6 2 124.39 13
 2 6 -2 126.79 13.1
 -2 6 2 121.49 13
 2 6 -2 124.29 10.9
 -2 6 2 117.89 12.1
 2 -6 2 128.69 11.2
 -2 -6 -2 119.29 13.9
 -2 6 2 153.48 13.5
 -2 -6 -2 117.49 11.9
 2 6 2 122.69 13.2
 -2 6 -2 130.59 12.8
 -2 6 -2 113.29 12.3
 2 -6 -2 138.39 11.3
 -2 6 -2 152.68 13.5
 -2 6 -2 132.29 12.2
 -2 -6 2 104.39 13.7
 2 6 2 119.79 11.6
 3 6 -2 21.8 5
 -3 6 2 17.1 4.9
 3 6 -2 12.7 5.2
 -3 6 2 16.6 6.1
 3 -6 2 27.3 5.4
 -3 6 2 12.1 5.2
 -3 -6 -2 24.7 5.6
 -3 -6 -2 17.2 5.2
 -3 -6 2 27.8 7.1
 -3 6 -2 23.4 6.2
 -3 6 -2 20.1 5.7
 3 -6 -2 23.8 4.8
 3 -6 -2 19.3 5.2
 -3 6 -2 30.3 7.4
 3 6 2 27.4 7.6
 3 6 2 26 8.2
 -4 6 2 182.68 17
 4 -6 2 148.19 16.4
 4 6 -2 209.48 19.7
 4 6 -2 161.38 15.8
 -4 6 2 184.48 17
 -4 6 -2 170.48 16
 4 6 2 193.28 18.1
 4 6 2 193.38 19.8
 -4 6 -2 165.48 16.1
 4 6 2 174.68 16.5
 -4 -6 2 194.48 19.3
 -4 6 -2 184.28 16.9
 0 7 -2 0.7 1.8
 0 7 -2 1.9 2.1
 0 7 2 -1.9 1.9
 0 7 -2 1.5 1.9
 0 7 2 -0.9 1.6
 0 7 -2 -0.6 1.4
 0 7 2 1.7 2.1
 -1 7 2 11.5 3.8
 1 7 -2 4.7 2.3
 -1 7 2 3.4 2.8
 1 7 -2 3.2 3.5
 1 -7 2 7 1.8
 -1 7 2 4.5 2.9
 1 7 -2 6.6 3
 -1 7 2 7.5 2.6
 1 7 2 9.7 3.6
 -1 7 -2 9.3 3.1
 -1 -7 2 3.6 2.8
 1 -7 -2 8.2 1.8
 1 7 2 7.7 4
 -1 7 -2 8.2 2.8
 -1 7 -2 8.9 2.8
 -1 7 -2 7.5 3.5
 1 7 2 1.7 2.2
 1 7 2 13 11.7
 2 -7 2 84.79 9.6
 -2 7 2 89.89 10.1
 -2 -7 -2 90.89 11.3
 2 7 -2 60.49 9
 -2 7 2 73.39 8.5
 -2 7 2 89.39 9.8
 2 -7 2 72.39 8
 -2 -7 -2 79.69 9.2
 -2 7 2 79.89 9.9
 -2 7 2 71.19 10.1
 2 -7 -2 76.99 7.8
 -2 7 -2 84.39 10
 -2 7 -2 78.89 9.5
 -2 7 -2 83.69 10.1
 -2 7 -2 77.99 9.4
 2 7 2 93.09 10.8
 2 7 2 81.19 11.1
 -2 -7 2 81.39 11.6
 3 7 -2 -1 3.4
 3 7 -2 8.5 5
 3 -7 2 6.4 3.1
 -3 -7 -2 8.8 4.6
 -3 7 2 2.3 3.6
 3 -7 2 4 4.4
 -3 7 2 5.8 3.9
 -3 7 2 13.9 5.4
 -3 -7 -2 7.4 4
 3 7 2 6.4 4.3
 -3 7 -2 5.9 4.1
 -3 7 -2 1.7 3.1
 -3 -7 2 3.1 4.1
 3 -7 -2 2.8 2.5
 -3 7 -2 7.5 4.6
 3 7 2 6 4
 -3 -7 2 14.7 4.6
 3 7 2 4.1 4.4
 4 7 -2 175.38 16.3
 -4 7 2 156.48 14.6
 -4 7 2 152.58 14.7
 4 7 -2 164.38 16.6
 4 7 -2 122.19 13.6
 -4 -7 2 143.09 15.9
 4 7 2 153.58 15
 -4 7 -2 152.28 13.7
 4 7 2 142.39 16.5
 -4 7 -2 141.29 15
 0 8 2 99.49 9.4
 0 8 -2 103.69 11.6
 0 8 2 101.39 11.1
 0 8 -2 112.19 11.3
 0 8 -2 113.19 11.6
 0 8 2 123.19 13.6
 0 8 2 113.49 12.1
 0 8 -2 109.19 10
 1 -8 2 197.58 14.5
 -1 8 2 189.78 17.7
 1 8 -2 208.08 18.2
 -1 8 2 205.68 16.6
 1 8 -2 187.58 18.7
 1 8 -2 191.28 18.4
 -1 8 2 199.88 17.5
 -1 8 2 191.18 16.4
 1 8 -2 160.68 17.1
 1 -8 -2 198.68 14.4
 -1 8 -2 223.28 18.3
 1 8 2 205.08 19.1
 -1 8 -2 187.88 16.4
 -1 8 -2 173.78 17.2
 -1 8 -2 189.18 16.1
 1 8 2 183.18 15.9
 1 8 2 210.28 27.2
 -1 -8 2 164.68 16.4
 -2 8 2 260.17 22.8
 2 -8 2 301.47 21
 -2 -8 -2 285.97 22.8
 2 8 -2 252.97 22.8
 -2 8 2 258.27 22.7
 -2 8 2 252.37 22.3
 -2 8 2 281.27 23.1
 -2 8 2 241.68 21.6
 -2 8 -2 254.17 22.3
 2 8 2 275.57 25.1
 -2 8 -2 270.77 22.5
 -2 8 -2 260.07 23.3
 -2 -8 2 230.28 23.6
 -2 8 -2 283.57 22.7
 2 8 2 247.38 22.9
 2 -8 -2 235.58 20
 -3 8 2 221.28 20.7
 -3 -8 -2 197.98 18.8
 3 -8 2 211.08 18.7
 3 8 -2 266.87 22.9
 -3 -8 -2 192.58 21.6
 -3 8 2 241.78 21.2
 -3 8 -2 204.88 19.9
 -3 8 -2 221.18 20.3
 -3 -8 2 233.78 22.1
 3 8 2 202.88 21.7
 3 -8 -2 170.58 17.6
 -3 -8 2 201.68 19.1
 3 8 2 235.78 22.3
 -3 8 -2 216.28 19.8
 0 9 2 4.1 2.6
 0 9 2 2.3 3.9
 0 9 2 -1.1 2.7
 0 9 -2 -1 2.1
 0 9 2 3.5 2.7
 0 9 -2 -1.6 2.5
 0 -9 2 4.9 3.4
 0 9 -2 0 2.3
 -1 9 2 258.97 22.5
 1 9 -2 260.87 25.3
 1 9 -2 275.47 23.6
 -1 9 2 269.17 21.5
 1 9 -2 241.18 20.7
 -1 9 2 275.87 23.4
 -1 9 2 247.78 21.2
 1 9 -2 263.37 23.4
 -1 9 2 274.07 23.6
 1 9 2 282.47 24.8
 -1 9 -2 243.08 22.9
 -1 9 -2 253.17 23
 1 9 2 256.87 33.1
 1 9 2 267.17 20.6
 -1 -9 2 251.17 21.9
 -1 9 -2 294.57 21.7
 -1 9 -2 240.08 21
 2 -9 2 139.49 12.9
 -2 9 2 157.98 15.5
 -2 9 2 132.69 14.7
 -2 9 2 152.18 15
 2 9 -2 159.28 17.3
 -2 9 2 128.69 14.4
 -2 -9 -2 129.39 14.3
 2 9 -2 163.48 15.7
 2 -9 -2 142.49 12.4
 -2 9 -2 146.79 14.7
 -2 9 -2 129.09 15.5
 2 9 2 125.09 17.6
 2 9 2 148.29 17
 -2 9 -2 143.69 15.1
 -2 -9 2 159.68 17.2
 -2 9 -2 143.29 15.2
 -3 -9 -2 -1.1 5.4
 3 9 -2 1.1 3.1
 3 9 -2 0.8 2.3
 -3 9 2 4.3 3.5
 -3 9 2 2.5 2.9
 3 9 2 6 3.8
 -3 9 -2 1.6 3.5
 -3 9 -2 -4.1 3.1
 3 9 2 -3.2 3.1
 -3 9 -2 3.7 3.4
 -3 -9 2 21.6 7.4
 0 10 2 355.16 29.6
 0 10 -2 325.47 28.5
 0 10 -2 269.87 26.7
 0 -10 2 344.27 26.6
 0 10 2 355.86 29
 0 10 -2 349.37 28.4
 0 10 2 329.57 28.7
 -1 10 2 -2.4 2.8
 -1 10 2 -4 3.8
 1 10 -2 2.8 2.2
 1 10 -2 0.3 13.6
 1 10 -2 2.3 3.2
 -1 10 2 2.2 3.9
 -1 10 2 2 2.7
 1 10 -2 6.2 3.5
 -1 10 -2 8 3.4
 1 10 2 -1.4 15.5
 -1 -10 2 4.8 3.2
 -1 10 -2 1.4 3.1
 -1 10 -2 -1.9 2.3
 1 -10 -2 -2.4 1.9
 -1 10 -2 -0.7 3.4
 1 10 2 -2.2 2.5
 -2 10 2 102.19 11.7
 -2 10 2 111.89 12.2
 2 10 -2 107.09 13.8
 2 10 -2 103.79 12.2
 -2 10 2 99.59 11.8
 -2 -10 -2 114.89 12.5
 -2 10 -2 87.69 11.5
 2 10 2 119.99 15.1
 2 10 2 100.09 11.6
 -2 10 -2 104.89 13.2
 -2 10 -2 112.99 12.1
 -2 10 -2 93.49 12.6
 -3 10 2 18.3 5.5
 -3 10 2 13.2 4.3
 3 10 -2 12.4 4.7
 3 10 -2 11.5 4.5
 -3 10 -2 20.2 5.4
 -3 10 -2 17.9 5.3
 -3 10 -2 20.7 5.6
 3 10 2 20.4 5.2
 3 10 2 10.8 4.6
 -3 -10 2 6.3 6.5
 0 11 -2 -3.9 3
 0 11 2 2.1 8
 0 11 -2 -1.4 3.3
 0 -11 2 1.5 3.4
 0 11 -2 -2.9 2.6
 0 11 2 1.7 4.5
 0 11 2 -3.7 2.5
 -1 11 2 225.58 19
 -1 11 2 218.98 22.4
 -1 11 2 235.88 21.4
 1 11 -2 231.88 23
 -1 11 2 239.78 21.9
 1 11 -2 225.18 22.2
 1 11 -2 287.67 34.3
 -1 11 -2 237.88 22.1
 1 11 2 239.58 34.6
 -1 11 -2 210.58 21.8
 1 11 2 226.18 23.5
 -1 11 -2 225.28 19.7
 2 11 -2 -5.3 2.6
 -2 11 2 0.2 3.4
 2 11 -2 -2.4 3.5
 -2 11 2 -3.9 2.4
 -2 11 2 -3.7 3.3
 -2 11 -2 -0.5 3.1
 -2 11 -2 0.8 3.1
 2 11 2 4.9 3.4
 -2 11 -2 2.8 3.9
 2 11 2 4.2 3
 -3 11 2 6 4.2
 3 11 -2 1.1 3.1
 3 11 -2 1.2 3.4
 -3 11 2 8.5 3.7
 -3 11 -2 8.1 3.9
 3 11 2 8.9 5.4
 -3 11 -2 7 3.5
 3 11 2 1.2 2.6
 0 12 2 374.46 32.8
 0 12 2 370.16 41.5
 0 12 -2 366.66 33.5
 0 12 -2 411.56 33.7
 0 -12 -2 361.06 30.3
 -1 12 2 125.49 12.5
 1 12 -2 141.29 15.6
 -1 12 2 163.88 17.6
 -1 -12 -2 143.39 15.4
 -1 12 2 133.29 16.7
 1 12 -2 134.29 17.4
 -1 12 -2 145.69 16.4
 1 12 2 133.29 24.8
 -1 12 -2 137.79 17.1
 1 12 2 160.18 17.6
 -2 12 2 1 2.9
 -2 12 2 2.2 3.5
 -2 12 2 -0.7 4.5
 2 12 -2 -1.8 3.1
 -2 12 -2 3.9 3.2
 2 12 2 4.1 3.6
 -2 12 -2 6 4.3
 0 13 -2 -2.1 8.7
 0 13 2 20.5 22.9
 0 13 2 11 6.6
 1 13 -2 5 5.2
 -1 13 2 5.4 11.1
 1 13 2 -0.7 3.2
 1 13 2 -1.8 39.9
 2 13 -2 83.49 10.2
 -2 13 2 69.59 8.8
 -2 13 2 49.4 11.5
 2 13 2 78.59 11.2
 -2 13 -2 73.39 9.9
 0 14 2 6.3 19.9
 0 14 -2 -5.2 21.7
 0 14 2 2.7 5.3
 1 14 -2 -11.9 5.3
 -1 14 2 16.9 19.6
 1 14 -2 -12.6 15
 1 14 2 6.2 4.3
 -1 14 -2 -1.5 6.9
 0 0 -3 0.7 0.7
 0 0 3 -0.3 0.9
 1 0 3 868.21 58.09
 -1 0 -3 852.91 57.99
 2 0 3 2.2 1.5
 -2 0 -3 -1.5 1.9
 2 0 -3 -0.7 1.2
 2 0 3 -1.4 2.2
 -2 0 -3 0 1.7
 -2 0 3 1.8 1.6
 -2 0 3 11.3 3.5
 2 0 3 1.2 1.7
 -2 0 -3 0.3 0.9
 3 0 3 450.95 33.7
 -3 0 -3 414.06 31.7
 -3 0 3 422.86 33.1
 3 0 -3 462.15 32.6
 -3 0 -3 384.36 32
 3 0 -3 396.86 34.9
 3 0 -3 438.66 32.2
 3 0 3 446.56 32.7
 -3 0 -3 419.16 32.6
 -3 0 3 436.46 35
 3 0 3 505.65 37.6
 -3 0 3 488.05 34.8
 -4 0 3 0.8 3.6
 4 0 3 2.8 3.3
 4 0 -3 -9.4 4.8
 -4 0 3 2 2.8
 4 0 -3 0.1 2.8
 4 0 3 11 6.7
 0 -1 3 860.51 62.39
 0 -1 -3 998.1 62.29
 1 -1 3 7027 469.75
 1 1 -3 7022.1 469.45
 -1 1 -3 6807.02 469.55
 1 -1 -3 6770.82 463.25
 -1 -1 3 6482.75 469.15
 1 -1 -3 6269.27 465.55
 1 1 3 6706.53 470.65
 2 -1 3 12.7 3.4
 -2 -1 -3 16.2 2.7
 -2 1 3 25.3 4.7
 -2 1 3 21.8 4.9
 2 -1 3 19.4 3.2
 2 1 -3 15.7 2.6
 2 1 -3 13.7 3.3
 -2 -1 -3 22.3 4.8
 -2 1 -3 16 3.6
 2 1 3 23.1 3.2
 -2 1 -3 23.3 4.3
 -2 -1 3 23 4.9
 -2 -1 3 26.8 5.2
 -2 1 -3 18.8 4.6
 -2 1 -3 17.1 2.3
 2 1 3 18.2 7.2
 2 -1 -3 16 2.7
 2 1 3 18.8 3.6
 3 -1 3 253.27 20
 -3 1 3 232.48 21.4
 3 1 -3 234.48 19.5
 3 1 -3 236.58 19.1
 -3 -1 -3 233.58 22.1
 3 -1 3 249.68 20.8
 -3 1 3 240.28 20.7
 3 -1 3 256.47 24.3
 -3 1 3 236.68 21.1
 3 1 -3 241.88 22.3
 3 1 3 231.28 20.5
 -3 1 -3 215.88 19.6
 3 1 3 243.98 19.7
 -3 -1 3 264.37 22.7
 -3 1 -3 248.88 20.4
 3 -1 -3 255.27 22.6
 3 1 3 246.58 23.3
 3 -1 -3 251.17 19.5
 -3 -1 3 270.37 21.5
 3 -1 -3 240.28 19.4
 -4 1 3 79.39 9.9
 4 1 -3 85.49 12.4
 4 1 -3 74.39 9.4
 -4 1 3 65.59 8.7
 4 -1 3 64.69 10
 4 1 3 73.39 12.4
 4 1 3 65.89 9.4
 -4 -1 3 75.49 9.7
 4 -1 -3 61.09 8.9
 -4 -1 3 78.59 11
 0 -2 -3 -0.3 0.8
 0 2 -3 -0.3 0.9
 0 2 -3 -0.4 1
 0 -2 3 0.2 0.9
 1 2 -3 207.68 15.4
 -1 2 3 228.38 15.2
 -1 -2 -3 249.18 16.1
 1 -2 3 221.58 15.6
 1 -2 -3 193.78 14.5
 1 2 3 217.48 15.6
 -1 2 -3 199.58 15.9
 -1 2 -3 214.28 15.3
 -2 2 3 102.79 10.4
 2 2 -3 112.09 10.6
 -2 -2 -3 116.39 9.3
 -2 -2 -3 111.29 10.9
 -2 2 3 95.79 10.2
 2 2 -3 105.49 8.8
 2 -2 3 120.29 9.5
 -2 2 3 101.39 9.7
 2 -2 3 100.39 9.5
 2 2 3 103.09 9.5
 2 2 3 116.79 9.3
 -2 -2 3 103.89 10.8
 2 -2 -3 93.29 8.4
 -2 2 -3 116.19 9.5
 -2 2 -3 108.89 10
 -2 2 -3 79.59 11.8
 2 2 3 101.09 11.1
 -2 2 -3 105.99 8.2
 3 -2 3 38.5 6
 3 2 -3 58.39 6.7
 3 2 -3 48.5 8.5
 3 -2 3 39.9 6.8
 3 -2 3 48 13.3
 -3 2 3 45.2 7.5
 -3 2 3 51.39 7.2
 -3 -2 -3 54.89 8.6
 3 2 -3 46.8 5.7
 -3 2 3 50.39 8.1
 -3 2 3 36.8 6.8
 3 -2 -3 55.59 6.7
 3 2 3 52.69 7.5
 -3 2 -3 52.09 7.2
 3 -2 -3 53.39 6.4
 -3 -2 3 54.19 8.9
 -3 -2 3 47.6 7.6
 3 2 3 46.8 6.4
 3 2 3 62.09 10
 -3 2 -3 51.59 7.1
 -4 2 3 2 3.2
 4 -2 3 2.8 3.3
 4 2 -3 1.4 2.8
 4 2 -3 3.5 3.8
 -4 2 3 4.6 3.5
 -4 2 -3 -3 5.9
 4 2 3 -4.6 3.6
 4 2 3 1.7 4.7
 -4 2 -3 -4.9 2.3
 -4 -2 3 3.1 3.5
 4 -2 -3 -2.4 2.4
 4 2 3 0.4 5.9
 0 3 -3 885.51 63.49
 0 -3 3 1038.8 62.99
 0 3 3 884.61 63.99
 1 3 -3 717.63 53.89
 -1 -3 -3 856.31 54.49
 -1 3 3 808.72 53.79
 1 -3 3 823.92 53.79
 1 3 3 787.72 53.79
 -1 3 -3 742.13 56.19
 -1 3 -3 800.52 53.69
 2 -3 3 417.66 28.1
 -2 3 3 367.86 29.5
 2 3 -3 396.26 29.7
 2 3 -3 397.46 27.7
 -2 3 3 386.86 28
 2 3 -3 402.46 27.2
 -2 -3 -3 359.36 27.9
 2 -3 3 377.56 28.3
 -2 3 3 385.86 29.5
 -2 -3 -3 351.66 29.5
 -2 3 3 392.46 30.1
 2 3 3 381.96 28.3
 -2 3 -3 416.36 28.4
 -2 3 -3 385.76 29
 2 -3 -3 372.56 27
 -2 3 -3 364.36 28.6
 2 3 3 394.86 27.8
 2 3 3 368.06 30.1
 -2 -3 3 385.36 30.6
 -3 3 3 40 8.3
 -3 3 3 36.6 5.6
 3 -3 3 34.3 6.7
 -3 -3 -3 42.9 5.1
 3 3 -3 36.4 5
 3 3 -3 43 8.9
 -3 3 3 49.6 7.7
 3 -3 3 35.8 5.6
 3 3 -3 46.5 5.9
 -3 -3 -3 33.3 7.9
 3 3 3 34.2 6.9
 -3 -3 3 29.4 7.5
 -3 3 -3 37 7.2
 3 -3 -3 41.7 5.6
 3 3 3 35.7 5.7
 -3 -3 3 31.5 6.1
 -3 3 -3 25.3 5.9
 3 3 3 38.6 8.9
 3 -3 -3 33.8 5.4
 4 3 -3 51.09 7.8
 -4 3 3 56.89 8.6
 4 -3 3 65.29 9.3
 -4 3 3 60.79 8.7
 4 3 -3 51.39 10.2
 -4 3 -3 56.29 10
 -4 -3 3 57.79 10
 4 3 3 40.4 8.2
 4 -3 -3 56.29 7.8
 4 3 3 47.4 8.1
 -4 3 -3 49.99 7.9
 4 3 3 61.99 12
 0 4 -3 -0.5 1.1
 0 -4 3 0.6 0.8
 0 4 3 2.8 1.8
 1 4 -3 159.68 12.6
 1 -4 3 150.48 11.8
 -1 4 3 153.78 12.3
 1 -4 -3 161.58 11.3
 1 4 3 148.39 11.8
 -1 4 -3 163.18 12.9
 -2 4 3 170.18 13.2
 2 4 -3 149.19 12.4
 -2 4 3 147.39 11.5
 2 -4 3 158.58 13.3
 -2 4 3 155.28 14.3
 -2 -4 -3 151.78 13.1
 -2 4 3 143.99 11.9
 -2 -4 -3 177.38 15.2
 2 4 -3 141.89 11.6
 2 4 -3 162.88 14.5
 -2 4 3 143.89 14.5
 2 -4 3 152.28 12.7
 -2 4 3 161.78 14.6
 -2 4 -3 157.28 14.2
 2 4 3 138.09 14.4
 -2 4 -3 158.38 14
 2 4 3 167.68 13.4
 2 4 3 167.38 12.6
 -2 4 -3 134.49 13.4
 2 -4 -3 155.98 12
 -2 4 -3 155.88 13.3
 -2 -4 3 176.68 15.8
 3 4 -3 194.98 16.5
 -3 4 3 207.08 18.7
 3 4 -3 210.48 19.8
 3 -4 3 177.28 16.4
 -3 -4 -3 232.68 20.6
 3 4 -3 189.98 15.1
 -3 4 3 173.98 18.2
 -3 -4 -3 165.68 15.5
 3 -4 3 189.98 17.6
 -3 4 -3 199.48 17.7
 -3 4 -3 196.58 18.1
 3 4 3 196.78 17.7
 -3 4 -3 167.38 17.7
 3 4 3 175.38 19.5
 3 -4 -3 205.18 16.6
 3 4 3 188.28 16.3
 -3 -4 3 186.78 19.8
 -3 -4 3 180.68 16.6
 3 -4 -3 201.98 16.3
 4 4 -3 6.7 4.9
 -4 4 3 -0.8 3.6
 -4 4 3 1.3 3
 4 -4 -3 -1.6 2.9
 -4 4 -3 2.3 3.2
 4 4 3 -5.1 3.2
 -4 4 -3 -0.2 2.9
 -4 -4 3 3.1 3.5
 0 5 3 888.41 64.69
 0 -5 3 972.2 62.49
 -1 5 3 350.66 28.1
 -1 5 3 386.86 27.3
 -1 5 3 358.66 26.7
 1 5 -3 364.46 27
 1 5 -3 358.76 27.2
 -1 5 3 316.07 26.9
 1 -5 3 378.46 25.7
 -1 5 -3 365.96 27.1
 -1 -5 3 342.77 27.4
 -1 5 -3 424.76 31.7
 1 -5 -3 376.26 25.4
 1 5 3 359.76 27.2
 -1 5 -3 366.76 26.8
 2 5 -3 521.15 37.5
 -2 5 3 512.35 38.3
 -2 5 3 517.15 37
 2 5 -3 535.35 36.1
 -2 -5 -3 520.05 38.9
 2 -5 3 505.95 38.4
 -2 5 3 504.95 40
 2 -5 3 548.15 38.7
 -2 5 3 558.14 41.1
 -2 5 3 566.04 40.4
 2 5 -3 476.05 42.4
 -2 -5 -3 600.44 40.9
 -2 -5 3 540.75 41.1
 2 5 3 524.35 37.3
 2 5 3 488.55 38.1
 -2 5 -3 569.04 39.6
 2 5 3 528.85 41
 2 -5 -3 510.65 36.8
 -2 5 -3 523.45 38.7
 -3 5 3 158.78 21.7
 3 5 -3 218.68 25.9
 3 5 -3 195.38 17.2
 3 -5 3 192.78 17.7
 3 -5 3 188.18 16.5
 -3 -5 -3 177.58 19.1
 -3 -5 -3 174.38 15.9
 3 -5 -3 184.58 15.7
 3 -5 -3 192.88 16.3
 3 5 3 167.18 16.7
 -3 -5 3 198.18 20.7
 -3 5 -3 182.88 18.4
 -3 5 -3 178.18 17.8
 -4 5 3 288.17 24.9
 4 5 -3 298.57 27.3
 4 -5 3 327.97 26
 4 5 -3 300.17 24.2
 -4 5 3 320.37 25.7
 4 5 3 250.07 24.4
 4 5 3 280.37 27.7
 -4 5 -3 301.57 23.9
 4 -5 -3 294.27 23.8
 -4 5 -3 283.37 24.6
 -4 -5 3 318.17 27.4
 4 5 3 308.17 25
 0 6 -3 1.3 1.3
 0 6 3 0.5 1.5
 0 6 3 1.8 2.1
 0 6 -3 0.1 1.7
 0 6 -3 -1.3 1
 1 6 -3 156.98 13.1
 -1 6 3 144.49 12.7
 1 -6 3 149.49 11.2
 1 6 -3 136.89 13
 -1 6 3 144.69 12.8
 -1 6 3 156.78 13.9
 1 6 -3 164.38 12.9
 -1 6 3 148.79 12.7
 -1 6 3 131.19 12.2
 1 -6 -3 127.79 11.1
 -1 6 -3 138.29 12.3
 -1 6 -3 138.89 12.4
 -1 6 -3 157.08 13.2
 1 6 3 143.69 15.9
 1 6 3 150.18 12.8
 -1 6 -3 123.19 12.7
 -1 6 -3 136.49 10.9
 1 6 3 132.49 13.6
 -1 -6 3 139.59 13.1
 -2 6 3 12.4 4.8
 -2 6 3 8.2 3.5
 -2 6 3 14.6 4.4
 -2 -6 -3 9.3 3.5
 -2 6 3 14.8 3.4
 -2 -6 -3 15.9 5
 2 6 -3 6.5 3.4
 2 -6 3 9.4 2.6
 2 -6 3 15.3 4.3
 -2 6 3 9.2 3.4
 2 -6 -3 8 2.2
 -2 -6 3 8.2 4.5
 2 6 3 5 2.9
 2 6 3 10.9 3.6
 2 6 3 8.2 3.4
 -2 6 -3 8.4 3.8
 -2 6 -3 10.8 3.9
 -2 6 -3 10.1 3.6
 -2 6 -3 9.2 3.6
 3 -6 3 133.49 12.8
 3 6 -3 136.59 13
 3 6 -3 138.49 16
 -3 6 3 156.78 15.6
 -3 -6 -3 131.39 15.7
 3 -6 3 138.69 14.5
 -3 -6 -3 120.89 12.7
 -3 6 3 135.09 15
 -3 6 -3 152.48 15.1
 3 -6 -3 134.79 12.6
 -3 -6 3 137.19 16.2
 -3 6 -3 151.48 14.3
 3 6 3 121.99 16.2
 -3 6 -3 137.79 14.7
 3 6 3 113.99 13.3
 -4 6 3 4.5 3.4
 -4 6 3 1.5 2.9
 4 6 -3 6.4 5
 4 6 -3 6.9 3.3
 4 -6 3 1.5 4.2
 -4 6 -3 8.3 3.2
 -4 6 -3 3.1 3.3
 4 6 3 10.3 5.5
 -4 -6 3 10.6 5.4
 4 6 3 5.2 4.3
 4 6 3 6.4 3.3
 0 7 -3 568.74 41.8
 0 7 -3 562.64 39.6
 0 7 3 549.05 42.4
 0 7 3 549.74 41.2
 0 7 -3 614.64 41.9
 0 7 -3 538.35 39.9
 0 7 3 593.44 42.4
 -1 7 3 -3.5 1.6
 1 7 -3 -3.3 2.8
 -1 7 3 2.5 2.3
 -1 7 3 -0.5 2.4
 1 7 -3 -1.6 1.8
 -1 7 3 -0.2 1.8
 -1 7 3 -1.6 2.2
 1 -7 3 -1.5 0.9
 1 -7 3 7.2 3.4
 1 7 -3 1.5 1.6
 1 7 3 1.6 2.2
 1 -7 -3 0.6 0.9
 -1 7 -3 -2.3 1.4
 -1 7 -3 -3.2 1.7
 -1 7 -3 2.5 1.7
 -1 7 -3 -2 2
 1 7 3 7 9
 1 7 3 1.2 2.6
 -1 7 -3 0.4 1.7
 -1 -7 3 -3.9 2.4
 -2 -7 -3 49.8 8.5
 2 -7 3 48.2 6.1
 -2 7 3 61.19 8.9
 -2 -7 -3 53.89 7.3
 2 7 -3 56.29 6.4
 2 7 -3 41.9 7.4
 -2 7 3 50.69 7.7
 -2 7 3 63.79 7.7
 -2 7 3 59.09 8.3
 -2 7 3 44.8 6.4
 -2 7 -3 51.19 8.2
 -2 -7 3 39.4 8.2
 2 7 3 54.89 8.3
 2 -7 -3 47.8 5.9
 -2 7 -3 53.59 7.6
 -2 7 -3 51.59 9
 2 7 3 63.29 9.4
 -2 7 -3 48.9 7.5
 3 7 -3 167.78 14.2
 -3 7 3 162.08 16.5
 -3 -7 -3 127.49 14.4
 3 -7 3 139.39 14.4
 -3 7 3 168.78 16.7
 3 7 -3 142.79 16.8
 -3 -7 -3 166.98 17.6
 3 -7 3 152.88 15.7
 -3 7 -3 147.99 15.2
 -3 -7 3 127.29 16.6
 -3 7 -3 137.99 15.6
 -3 -7 3 129.39 14.5
 -3 7 -3 160.38 15.9
 3 -7 -3 144.49 13.8
 3 7 3 167.08 17.4
 3 7 3 164.78 18
 -4 7 3 9.8 4.3
 4 7 -3 10.2 4.6
 4 7 -3 8.6 3.9
 4 -7 3 2.7 4.4
 4 7 -3 11 4.2
 -4 7 3 9.2 3.5
 -4 7 -3 2.5 5
 -4 7 -3 9.4 3.3
 4 7 3 9.8 3.6
 4 7 3 8.5 4.6
 -4 -7 3 11.9 5.3
 0 8 3 -1.9 2.8
 0 8 3 1.3 2.5
 0 8 3 4.6 3
 0 8 -3 -0.8 1.4
 0 8 -3 -3.5 1.9
 0 8 -3 2.4 2.2
 0 8 -3 3.1 2.4
 0 -8 3 1.1 3.2
 -1 8 3 -3.3 3
 1 -8 3 4.1 1.6
 1 8 -3 0.4 3.8
 -1 8 3 2.7 2.3
 -1 8 3 0.6 2.6
 1 8 -3 -0.3 1.6
 1 8 -3 1.4 2.3
 -1 8 3 5.6 3
 1 -8 3 3.5 4.7
 1 -8 -3 7.4 2
 1 -8 -3 -0.5 1.3
 -1 8 -3 2.9 2.6
 -1 -8 3 0.5 2.9
 1 8 3 -1.8 11.3
 1 8 3 5.4 2.4
 -1 8 -3 1.8 3.1
 -1 8 -3 6.2 3.9
 1 8 3 3.7 3.5
 -1 8 -3 7.2 3.2
 -2 -8 -3 154.78 15.2
 -2 8 3 144.09 15.4
 2 -8 3 149.59 15
 2 8 -3 161.38 15.8
 2 -8 3 151.98 13.5
 -2 8 3 125.69 15.1
 -2 8 3 141.99 14.5
 -2 8 3 170.18 16
 2 8 3 149.09 15.9
 -2 8 -3 153.38 15.4
 -2 8 -3 171.28 16.7
 2 8 3 159.88 17.5
 -2 8 -3 154.28 15.1
 2 -8 -3 166.18 13.4
 -2 -8 3 177.18 17.8
 -2 8 -3 157.88 15.3
 3 -8 3 2.3 4.7
 -3 8 3 6.5 3.4
 -3 -8 -3 2.9 4.1
 -3 8 3 4.9 3.9
 -3 -8 -3 -0.8 6.1
 3 -8 3 6.5 5.6
 3 8 -3 -5.6 3.7
 3 8 -3 3.6 4
 3 8 3 -0.4 3.5
 -3 -8 3 4.2 4.8
 -3 8 -3 -1.2 3.4
 3 8 3 4.7 5.1
 3 -8 -3 1.1 3.5
 -3 8 -3 0.4 2.7
 -3 8 -3 -0.4 3.2
 0 9 -3 349.67 27.8
 0 9 3 351.36 28
 0 9 -3 301.67 23.5
 0 9 3 316.77 28.5
 0 9 -3 295.67 26.5
 0 -9 3 367.06 27.2
 0 9 -3 346.27 28.3
 0 9 3 364.66 28.9
 1 9 -3 475.55 36.8
 1 9 -3 500.25 37.7
 1 9 -3 467.35 36.7
 -1 9 3 477.15 37.2
 1 9 -3 426.36 34
 -1 9 3 439.66 34.2
 -1 9 3 469.25 36.6
 -1 9 3 441.76 35.3
 -1 9 3 416.96 34.3
 1 9 3 488.85 41.4
 1 -9 -3 444.46 33.5
 1 9 3 449.36 33.3
 -1 9 -3 456.75 34.5
 -1 9 -3 488.85 37
 -1 9 -3 434.46 34
 -1 9 -3 460.55 36.5
 -1 -9 3 432.16 35.4
 1 9 3 531.85 39
 -2 9 3 156.68 16.5
 -2 -9 -3 166.18 16.1
 2 9 -3 159.58 16.3
 2 -9 3 173.08 15.3
 -2 9 3 144.19 15.9
 -2 9 3 170.28 16.1
 2 9 3 170.58 18.7
 -2 9 -3 169.08 15.9
 2 9 3 144.99 16.1
 -2 9 -3 177.98 17.3
 -2 9 -3 152.28 16.3
 -2 9 -3 154.88 15.6
 -3 9 3 1.4 2.9
 3 9 -3 -2.6 1.8
 -3 9 3 8.7 3.7
 -3 9 -3 2.9 3.2
 3 9 3 3.4 3.3
 -3 -9 3 -0.5 4.5
 -3 9 -3 2.9 4.2
 -3 9 -3 -0.9 2.4
 0 10 3 3.8 3.3
 0 10 -3 -1 3
 0 10 3 -2.2 2.9
 0 -10 3 -5.3 3.3
 0 10 3 -2.1 6.1
 0 10 -3 1.9 3.3
 0 10 -3 1.8 3.2
 -1 10 3 84.39 11.3
 -1 10 3 81.69 11.9
 1 10 -3 83.09 8.8
 -1 10 3 76.99 9
 1 10 -3 76.69 10.2
 1 10 -3 74.29 15.6
 -1 10 3 74.29 9
 -1 -10 -3 115.79 12.8
 1 10 -3 50.79 11.3
 -1 10 3 86.09 11
 -1 10 -3 75.59 9.5
 1 10 3 66.19 17.9
 -1 10 -3 83.59 10.9
 -1 10 -3 52.39 11.6
 1 10 3 78.09 12.3
 1 -10 -3 72.19 8.1
 -1 -10 3 109.49 10.9
 -2 10 3 110.89 13.6
 -2 10 3 139.69 14
 -2 -10 -3 128.59 14.4
 -2 10 3 124.29 13.9
 2 10 -3 140.29 16.1
 2 10 -3 163.48 15.2
 -2 10 -3 134.39 15.8
 2 10 3 153.28 17.1
 -2 10 -3 138.29 14.2
 2 10 3 137.49 13.9
 -2 10 -3 129.69 13.9
 -2 10 -3 122.69 15.1
 3 10 -3 145.19 15.7
 3 10 -3 155.58 17.3
 -3 10 3 153.28 15.2
 -3 10 3 174.78 15.8
 -3 10 -3 153.88 15.1
 -3 10 -3 166.88 15.8
 -3 -10 3 166.08 17.4
 3 10 3 121.49 16.4
 3 10 3 163.88 15.8
 0 -11 -3 874.51 70.79
 0 -11 3 949.21 70.59
 0 11 3 1052.69 75.39
 0 11 3 1152.38 76.69
 0 11 -3 1005 73.19
 -1 11 3 26.8 7.5
 -1 11 3 38.9 7.7
 -1 11 3 28.9 5.2
 1 11 -3 35 22.9
 1 11 -3 21.6 6.7
 -1 -11 -3 23.2 6.1
 1 11 -3 28.6 7.5
 -1 11 3 23.3 7
 1 11 3 34.3 9.8
 1 11 3 39.9 19.1
 -1 11 -3 39.2 9.2
 -1 11 -3 33.1 6.9
 -1 11 -3 18.5 6.1
 -2 11 3 267.57 23.4
 2 11 -3 284.37 23.6
 2 11 -3 316.77 26.9
 -2 11 3 270.97 23.8
 -2 11 3 295.97 24.3
 2 11 3 270.77 27.2
 -2 11 -3 345.17 26.8
 -2 11 -3 258.97 23.6
 3 11 -3 17.3 4.5
 -3 11 3 14.5 4.5
 -3 11 3 18.6 4.6
 3 11 -3 12.1 4.3
 -3 11 -3 22.8 5.2
 3 11 3 20.4 6.6
 -3 11 -3 18.9 4.4
 3 11 3 16.5 4.3
 0 12 3 4.6 5
 0 12 -3 -2.3 4.8
 0 12 -3 -2.1 4.6
 0 12 3 3.9 25.9
 1 12 -3 42.8 8.8
 -1 12 3 36.2 8.6
 -1 -12 -3 35.2 8.5
 -1 12 3 32 10.2
 1 12 -3 41.5 11.4
 1 12 -3 46.1 22.7
 1 12 3 25.4 18.4
 -1 12 -3 49.6 10.9
 -1 12 -3 42.6 9.8
 -2 12 3 5.7 5.5
 2 12 -3 11.9 4.3
 -2 12 3 7.7 3.3
 -2 12 3 13.9 4.3
 -2 12 -3 24.1 5.9
 -2 12 -3 9 4.3
 2 12 3 15.1 6.3
 0 13 3 2.8 19.6
 0 13 -3 6.3 8.1
 1 13 -3 261.67 34.8
 -1 13 3 287.47 34.3
 1 13 -3 229.98 22.5
 -1 13 -3 274.87 24.4
 1 13 3 255.57 24.6
 2 13 -3 15.1 4.4
 -2 13 3 1.9 12.7
 -2 13 3 10.7 3.8
 -2 13 -3 3.9 3.7
 2 13 3 1.7 3.3
 0 14 3 2 4.6
 0 14 3 18.1 21.1
 0 14 -3 -10.3 17.5
 1 14 -3 0.7 17.3
 -1 14 3 5 17
 -1 14 -3 8.9 6.4
 0 0 -4 255.27 17.1
 0 0 4 233.68 17.6
 -1 0 -4 -0.7 0.9
 1 0 4 0.4 1
 -2 0 4 73.59 8.9
 -2 0 4 85.79 8.3
 -2 0 -4 72.69 7.5
 -2 0 4 60.79 8.2
 2 0 4 85.79 8.1
 2 0 -4 79.29 7
 2 0 4 82.19 7.6
 2 0 4 89.89 10
 -2 0 -4 82.09 8.9
 -2 0 -4 79.19 6.9
 -3 0 4 -1.4 2.1
 -3 0 4 -0.1 2.1
 3 0 4 3.2 2.5
 3 0 4 -2.4 3.3
 3 0 -4 2.5 2.1
 3 0 -4 0.8 1.4
 3 0 -4 3.5 3.4
 3 0 4 0.1 2.4
 -3 0 -4 -2.4 2.8
 -3 0 -4 0.4 1.9
 -4 0 4 829.52 60.89
 4 0 -4 704.33 70.69
 4 0 4 786.62 64.39
 -4 0 4 884.51 60.49
 4 0 4 828.52 61.09
 4 0 -4 847.72 59.49
 0 -1 -4 -0.3 0.9
 0 1 -4 0.7 1.1
 0 -1 4 0.5 1.2
 1 1 -4 11.9 1.4
 1 -1 4 12 2.4
 -1 -1 -4 14.7 2.4
 1 1 4 13 2.4
 -1 1 -4 13.1 2
 1 -1 -4 10.5 1.3
 -2 1 4 580.84 44.5
 2 1 -4 589.84 44.9
 -2 -1 -4 595.84 43.1
 -2 1 4 648.54 45.7
 2 1 -4 569.04 42.9
 2 -1 4 593.44 46.3
 2 -1 4 695.43 43.9
 -2 -1 -4 709.03 45.9
 2 -1 4 646.74 44.3
 -2 1 4 614.74 45
 2 1 4 714.53 47
 -2 -1 4 580.94 44.2
 -2 1 -4 610.44 42.7
 -2 1 -4 608.34 43.8
 2 1 4 592.34 44
 -2 -1 4 543.35 45.1
 2 1 4 668.03 43.8
 -2 1 -4 628.34 44.2
 -2 -1 4 640.04 45.6
 -3 1 4 394.46 31.3
 3 1 -4 405.06 29.4
 3 -1 4 392.26 33.9
 3 1 -4 386.86 28.9
 -3 1 4 386.36 31.6
 3 1 -4 382.66 32.1
 3 -1 4 397.56 31
 3 -1 4 380.36 29.7
 -3 1 4 369.86 30.5
 3 1 4 400.26 30.9
 -3 -1 4 331.87 31.5
 -3 -1 4 443.16 32
 -3 1 -4 366.26 28.9
 3 -1 -4 415.26 29.3
 -3 -1 4 410.86 29.9
 3 -1 -4 385.86 29.3
 3 1 4 368.36 29.5
 3 -1 -4 341.87 31.3
 -3 1 -4 415.26 29.6
 3 1 4 362.96 33.5
 -3 1 -4 409.86 30.1
 4 -1 4 -1.6 3.5
 -4 1 4 1.8 2.5
 -4 1 4 0 2.8
 4 1 -4 -1.5 2.3
 4 1 -4 16.1 6.7
 -4 1 4 7.8 5.3
 4 -1 -4 -0.2 2.3
 -4 -1 4 -0.1 2.5
 4 1 4 -1.8 2.9
 -4 -1 4 -1.8 4.4
 4 1 4 4.6 5.8
 0 2 -4 363.76 28.1
 0 -2 4 374.86 28.1
 0 2 -4 480.55 28.3
 1 2 -4 377.06 27.9
 1 -2 4 432.56 29.3
 -1 -2 -4 379.36 29.2
 1 2 4 413.26 28.6
 -1 2 -4 407.26 29.5
 -1 2 -4 401.06 28.2
 1 -2 -4 432.06 27.4
 2 2 -4 1136.49 84.89
 -2 -2 -4 1068.69 84.99
 2 -2 4 1333.47 83.79
 -2 2 4 1229.18 85.19
 2 -2 4 1256.07 84.29
 2 2 -4 1230.68 83.09
 -2 -2 -4 1199.88 83.29
 -2 2 4 1250.17 85.49
 -2 2 4 1181.48 83.99
 2 2 4 1235.18 84.19
 -2 2 -4 1174.38 82.49
 -2 2 -4 1262.67 83.99
 2 2 4 1256.17 86.29
 -2 2 -4 1290.37 84.19
 2 2 4 1302.47 83.69
 -2 -2 4 1085.49 85.39
 -2 2 -4 1307.67 84.59
 -3 -2 -4 913.31 67.89
 3 2 -4 967.7 72.39
 -3 2 4 968.1 70.29
 -3 2 4 1041.9 71.49
 -3 -2 -4 1032.1 73.09
 3 -2 4 1023.5 74.79
 3 -2 4 978.2 70.99
 3 2 -4 925.11 69.09
 3 -2 4 981 69.79
 -3 2 4 940.11 71.69
 3 2 -4 940.61 68.49
 -3 -2 4 1052.89 73.39
 3 2 4 967.3 70.79
 -3 -2 4 1081.99 71.79
 3 -2 -4 1026.3 69.09
 3 2 4 955 73.89
 3 2 4 973.1 69.59
 -3 2 -4 1101.99 70.79
 3 -2 -4 1031.5 69.49
 -3 2 -4 990.5 69.69
 -3 2 -4 947.91 69.09
 4 -2 4 78.99 11.5
 4 2 -4 116.69 16.4
 4 2 -4 86.79 10.1
 -4 2 4 96.49 11.5
 -4 2 4 103.89 12.3
 4 2 4 76.49 13.6
 -4 2 -4 80.29 11
 4 2 4 90.59 11.4
 4 -2 -4 92.89 10.5
 -4 -2 4 104.29 12.5
 -4 -2 4 93.89 10.9
 0 -3 -4 1.1 1.1
 0 -3 4 0 0.9
 0 3 -4 0.2 1.1
 1 -3 4 1173.58 83.19
 -1 -3 -4 1252.57 83.79
 1 3 -4 1324.27 83.39
 -1 3 -4 1239.68 83.19
 -1 3 -4 1288.37 83.99
 1 -3 -4 1147.29 82.19
 1 3 4 1217.88 83.39
 -2 -3 -4 1422.06 101.19
 -2 3 4 1473.75 101.19
 2 3 -4 1465.45 100.69
 2 -3 4 1585.64 101.49
 2 -3 4 1515.65 102.09
 -2 -3 -4 1471.65 103.39
 -2 3 4 1453.15 103.79
 -2 3 4 1600.34 103.59
 -2 3 4 1270.07 102.49
 -2 -3 4 1633.54 104.59
 2 3 4 1554.04 101.29
 2 3 4 1466.15 101.79
 -2 3 -4 1568.54 102.39
 2 -3 -4 1549.74 100.69
 -2 3 -4 1381.96 101.69
 -2 3 -4 1468.85 100.19
 2 3 4 1410.26 103.69
 -2 3 -4 1522.65 101.79
 3 -3 4 185.58 16.5
 -3 3 4 186.98 16.4
 3 3 -4 199.98 16.5
 -3 3 4 207.88 18.6
 -3 -3 -4 180.18 15.5
 3 3 -4 214.78 19.6
 3 -3 4 185.98 17.8
 3 3 -4 188.18 15.4
 -3 3 4 178.58 18.4
 -3 -3 -4 195.08 19.2
 -3 3 -4 184.98 16.1
 3 3 4 179.88 19.8
 3 3 4 184.58 16.5
 -3 -3 4 197.98 19.7
 3 -3 -4 187.28 15.8
 3 -3 -4 187.58 16.3
 3 3 4 186.88 17.5
 -3 -3 4 193.38 17.6
 -3 3 -4 210.68 17.2
 -3 3 -4 184.18 17.2
 -4 3 4 -1.1 3.5
 -4 3 4 9.7 5.8
 4 -3 4 4.9 3.9
 4 3 -4 2.9 2.9
 4 3 -4 -6.8 4.8
 -4 -3 4 2.9 3.9
 4 3 4 3.9 4.2
 4 3 4 7.4 3.7
 -4 3 -4 4.7 3.7
 -4 3 -4 3.2 3.5
 4 3 4 -1.2 4.3
 0 4 4 6976.2 474.75
 -1 -4 -4 2186.98 148.99
 1 -4 4 2472.05 148.49
 1 4 -4 2139.59 149.29
 -1 4 4 2190.68 148.79
 -1 4 4 2081.19 149.79
 1 4 -4 2540.85 149.09
 -1 4 -4 2065.09 149.39
 1 4 4 2082.49 148.39
 1 4 4 2258.37 149.99
 1 -4 -4 2396.96 147.59
 -1 -4 4 2067.69 149.99
 -1 4 -4 2096.89 149.19
 -1 4 -4 2124.89 149.09
 -1 4 -4 2194.58 149.19
 1 4 4 2321.57 149.79
 -2 4 4 148.89 14.8
 2 -4 4 154.88 12.6
 -2 4 4 161.58 14.6
 -2 -4 -4 157.28 13
 2 4 -4 139.09 12
 2 4 -4 161.48 14.3
 2 -4 4 137.49 13.1
 -2 -4 -4 140.29 14.5
 -2 4 4 145.49 13.9
 2 4 -4 138.69 11.2
 -2 4 -4 144.19 13.1
 2 -4 -4 139.79 11.3
 2 4 4 169.88 15.2
 2 4 4 149.29 12.9
 -2 4 -4 140.19 13.2
 2 4 4 135.29 12.2
 -2 -4 4 145.19 15
 -2 4 -4 184.08 14.7
 -2 4 -4 142.29 12.9
 3 4 -4 1.7 2.3
 3 4 -4 6.3 4
 -3 -4 -4 1.3 2.3
 -3 4 4 0.7 2.6
 3 -4 4 1.6 3.4
 -3 4 4 -1.1 3.1
 -3 -4 -4 2.5 3.2
 3 -4 4 1.8 3.6
 3 4 -4 -3.2 1.6
 -3 4 -4 -3 2.1
 3 -4 -4 -0.3 2.3
 3 4 4 -1 2
 -3 -4 4 -0.1 2.8
 -3 4 -4 -3 1.5
 -3 -4 4 -2.7 2.9
 3 4 4 7.2 4.6
 3 -4 -4 -0.1 2
 -3 4 -4 7 3.1
 3 4 4 2 2.8
 -3 4 -4 2.6 2.9
 3 4 4 3.7 3.3
 -4 4 4 2.7 2.7
 4 -4 4 4.6 4.4
 4 4 -4 0.5 3.1
 4 4 -4 -0.3 3.7
 -4 4 4 -0.1 2.9
 4 4 4 2.4 3.4
 4 4 4 -3.1 3.1
 -4 4 -4 2.2 3
 -4 -4 4 -1 2.6
 -4 4 -4 1.6 2.6
 4 4 4 2 4.1
 4 -4 -4 2.3 2.8
 0 5 4 -1 1.5
 0 5 4 1.4 2.1
 0 5 -4 -1.8 1.1
 -1 5 4 2355.96 168.28
 1 -5 4 2366.46 166.88
 -1 5 4 2450.45 170.48
 -1 5 4 2441.36 167.98
 1 5 -4 2470.65 168.18
 -1 -5 -4 2615.94 168.28
 1 5 -4 2629.64 168.18
 1 5 -4 2472.15 168.28
 -1 5 -4 2624.14 168.48
 1 5 4 2511.75 173.28
 1 5 4 2514.15 168.68
 -1 5 -4 2393.36 167.98
 -1 -5 4 2589.74 169.28
 -1 5 -4 2539.65 168.58
 -1 5 -4 2527.05 168.18
 1 -5 -4 2450.15 166.38
 -2 -5 -4 2.2 2.1
 2 5 -4 1.5 2.4
 2 5 -4 2.1 1.1
 2 -5 4 1.7 1.6
 -2 5 4 2.5 3.1
 2 5 -4 4.9 2
 -2 5 4 -0.6 2.2
 -2 5 4 0.4 3
 2 -5 4 3.4 2.8
 2 5 4 -0.7 2.7
 2 5 4 2.3 2
 -2 -5 4 0 2.3
 -2 5 -4 -0.6 2.2
 2 -5 -4 4 2.6
 2 5 4 0.8 3
 -2 5 -4 5.6 2.7
 -2 5 -4 3.5 2.7
 -2 5 -4 2 1.7
 2 5 4 0.5 1.7
 -2 -5 4 2.5 3.3
 -3 5 4 7.8 3.7
 -3 5 4 13.8 5.3
 -3 -5 -4 13.9 6.9
 3 -5 4 9.8 2.9
 3 5 -4 9.8 3.8
 3 5 -4 16 5
 3 -5 -4 17.3 4
 -3 5 -4 4.6 3.7
 -3 5 -4 7.6 3.8
 3 5 4 7.4 5.3
 -3 -5 4 2.5 3.4
 3 5 4 3.9 4.1
 -3 5 -4 11.2 4.3
 -3 5 -4 13.4 4.6
 3 -5 -4 8.2 2.9
 4 -5 4 2.7 4.4
 -4 5 4 6.8 3.4
 4 5 -4 3.2 2.8
 -4 5 4 9.4 3.7
 4 5 -4 10.9 4.8
 4 5 4 0.1 3
 -4 5 -4 7.1 3.5
 -4 -5 4 5.6 4.1
 -4 5 -4 1.1 3.8
 4 5 4 2 4.2
 4 5 4 5 4.2
 0 6 4 7208.78 481.55
 -1 6 4 50.49 6.7
 1 -6 4 55.29 5.5
 -1 -6 -4 55.49 6.5
 1 6 -4 50.99 5.2
 -1 6 4 43.3 6.2
 1 6 -4 58.89 6.6
 1 -6 4 55.29 7.2
 1 6 -4 53.69 6.9
 -1 6 4 51.79 6.6
 1 6 -4 49.4 6.5
 -1 6 4 52.09 6.6
 -1 6 4 68.39 8.5
 1 6 4 59.99 10
 -1 6 -4 50.39 6.5
 -1 6 -4 51.19 6.9
 -1 -6 4 71.89 7.9
 1 6 4 48.2 7.3
 -1 6 -4 56.29 7
 1 -6 -4 51.89 5.1
 -1 6 -4 53.99 6.4
 1 6 4 63.89 7.1
 -2 6 4 5.8 3.4
 2 -6 4 5.7 3.2
 -2 6 4 -1.7 2.1
 2 -6 4 1.5 1.4
 -2 -6 -4 0.8 2
 -2 6 4 -0.5 2.9
 2 6 -4 1.4 1.9
 2 6 -4 0.1 1.9
 -2 6 4 6.7 3.3
 2 6 4 0.4 2.2
 -2 6 -4 0.5 2.9
 2 6 4 -5.7 3.4
 2 6 4 0.6 2
 -2 6 -4 -4.2 2.2
 2 6 4 -2.1 2.2
 -2 6 -4 1.9 1.9
 -2 6 -4 -0.2 2.4
 -2 -6 4 -2.2 4
 3 6 -4 29.6 5.9
 -3 -6 -4 21.3 6.6
 -3 6 4 29.1 6.9
 -3 -6 -4 35.7 6.6
 3 6 -4 28.2 7.4
 -3 6 4 38.7 8.5
 3 -6 4 34.7 7.6
 3 -6 4 38.6 6.7
 3 -6 -4 35.7 7.6
 3 6 4 26.9 6.9
 3 -6 -4 31.8 5.7
 -3 6 -4 28.8 6.4
 -3 6 -4 37.8 7.5
 -3 6 -4 22.7 6.1
 -3 -6 4 30.1 8.1
 3 6 4 29.5 6.9
 4 6 -4 3 3.7
 4 -6 4 -0.6 3.3
 -4 6 4 2.7 2.9
 4 6 -4 12.4 5.5
 -4 6 4 6.3 3.7
 -4 6 -4 4 3.5
 -4 6 -4 8.4 3.4
 4 6 4 2.6 3.9
 4 6 4 6.1 2.9
 -4 -6 4 6.2 4.4
 4 -6 -4 -4.4 3.9
 0 7 -4 -1 2
 0 7 4 3.3 2.8
 0 7 4 4.6 3
 0 7 -4 1.2 1.9
 0 7 4 0.2 2.1
 0 -7 4 -0.1 2.3
 0 7 -4 -0.2 1.6
 -1 -7 -4 833.92 60.49
 -1 7 4 760.82 59.79
 1 7 -4 861.31 60.99
 -1 7 4 881.21 60.39
 -1 7 4 917.61 60.79
 1 -7 4 820.62 60.59
 -1 7 4 836.92 62.29
 1 7 -4 864.01 60.39
 -1 7 4 918.61 61.19
 1 -7 4 870.31 58.69
 -1 7 -4 844.62 61.29
 -1 -7 4 823.32 61.19
 1 -7 -4 846.22 58.59
 1 7 4 868.51 67.89
 -1 7 -4 779.02 58.09
 -1 -7 4 825.52 62.29
 -1 7 -4 890.01 60.29
 -1 7 -4 876.31 68.39
 -1 7 -4 853.91 59.99
 1 7 4 883.91 60.49
 1 7 4 887.81 62.49
 2 7 -4 602.24 49.6
 2 -7 4 694.53 49.6
 -2 7 4 604.34 47.9
 -2 -7 -4 550.34 50.09
 -2 7 4 652.73 50.39
 -2 7 4 661.93 50.09
 2 7 -4 671.63 47.2
 -2 7 4 671.73 50.19
 -2 -7 -4 691.33 49.3
 2 -7 4 674.43 47.8
 -2 7 -4 658.23 49.2
 2 -7 -4 666.83 47.5
 -2 7 -4 722.23 50.79
 -2 7 -4 696.43 47.5
 2 7 4 690.73 50.99
 2 7 4 684.53 52.19
 -2 7 -4 700.43 49.7
 -2 -7 4 723.43 52.19
 -2 7 -4 692.63 49.4
 -3 7 4 9.7 4.5
 -3 7 4 12.8 5.2
 3 7 -4 16.1 4.3
 3 7 -4 24.9 7.3
 -3 -7 -4 15.9 4.9
 3 -7 4 19 5.6
 3 -7 4 12.9 4.5
 -3 7 -4 16.1 5.1
 3 7 4 16.2 6.8
 -3 7 -4 13.6 6.1
 -3 7 -4 14.6 5.4
 3 -7 -4 8.8 3.3
 3 7 4 3.2 9
 -3 -7 4 19.8 8.1
 3 7 4 12.7 5.8
 0 8 4 187.18 18
 0 8 4 192.68 19.8
 0 8 -4 148.39 17.5
 0 -8 4 197.08 17.4
 0 8 -4 208.48 17.7
 0 8 -4 212.68 18
 0 8 -4 196.38 15.2
 0 8 4 189.58 17.8
 1 -8 4 443.96 33.1
 1 8 -4 437.66 33.5
 1 8 -4 467.85 32.8
 -1 8 4 450.45 33.8
 -1 8 4 415.96 34.4
 -1 -8 -4 394.66 32.5
 -1 8 4 503.95 38
 1 8 -4 356.06 32.7
 1 -8 4 397.66 30.3
 -1 8 4 408.86 32.3
 -1 8 -4 407.46 31.8
 1 -8 -4 387.56 30.6
 1 -8 -4 387.56 30.2
 1 8 4 459.95 35.7
 -1 8 -4 455.75 32.5
 1 8 4 393.96 31.6
 1 8 4 430.86 37.2
 -1 8 -4 449.86 33.9
 -1 -8 4 496.15 34.2
 -1 8 -4 475.95 34.2
 -2 8 4 886.81 67.39
 2 8 -4 1021.8 69.89
 -2 8 4 912.61 69.49
 2 -8 4 888.71 68.29
 -2 8 4 977.5 69.49
 -2 8 4 949.8 69.19
 2 -8 4 1021.7 67.29
 -2 -8 -4 966.8 68.69
 -2 8 -4 957.1 68.49
 -2 8 -4 978.3 70.09
 -2 8 -4 913.31 68.99
 -2 -8 4 847.92 70.19
 2 -8 -4 881.91 66.19
 2 8 4 1061.69 72.59
 2 8 4 1022.2 70.49
 -2 8 -4 997.7 68.69
 3 -8 4 113.79 14.4
 -3 8 4 126.09 14.4
 3 8 -4 133.59 15.3
 -3 8 4 119.49 14.2
 -3 8 -4 113.49 13.2
 3 8 4 113.09 15.1
 3 8 4 139.39 15.9
 -3 8 -4 147.39 14.9
 -3 -8 4 126.09 15.8
 -3 8 -4 127.19 14
 0 -9 -4 -0.8 1.8
 0 -9 4 -3.4 3.3
 0 9 4 1.3 6.4
 0 9 4 -3 2
 0 9 -4 0.3 3
 0 9 -4 1.4 3.2
 -1 9 4 31.5 6.8
 1 9 -4 35.7 5.5
 -1 9 4 41.3 8.8
 1 9 -4 20.7 5.4
 -1 9 4 34.9 6.1
 1 9 -4 26.8 8.2
 1 9 -4 25.8 5.6
 -1 -9 -4 32.6 6.5
 -1 9 4 28.9 6.1
 -1 9 4 24.4 6
 1 -9 4 22.8 6.7
 1 9 4 22.6 6.9
 1 9 4 28.7 4.8
 1 -9 -4 32.3 4.8
 1 -9 -4 27.3 4.4
 -1 9 -4 30.2 6.6
 -1 9 -4 33.2 7.4
 1 9 4 16.9 15.1
 -1 -9 4 29.9 7
 -1 9 -4 39 8.6
 -2 -9 -4 183.78 17.8
 2 9 -4 198.58 18.4
 2 -9 4 144.09 17.7
 -2 9 4 210.68 18.6
 -2 9 4 197.08 18.4
 -2 -9 4 169.98 19.8
 2 -9 -4 190.08 15.6
 -2 9 -4 215.88 18.1
 -2 9 -4 179.08 17.6
 -2 9 -4 193.98 19
 2 9 4 197.48 20.8
 2 9 4 228.18 19.4
 -2 9 -4 159.18 17.8
 3 9 -4 129.59 14.8
 -3 9 4 136.59 14.5
 -3 9 4 116.09 13.7
 -3 -9 4 111.89 15.5
 3 9 4 129.59 16.3
 3 9 4 110.19 16.9
 -3 9 -4 128.79 13.4
 -3 9 -4 116.19 16.4
 0 10 4 52.99 15.2
 0 10 4 69.49 11
 0 -10 -4 51.69 7.6
 0 10 -4 60.59 9.5
 0 10 -4 61.89 9.6
 0 -10 4 65.99 8.9
 1 10 -4 0 2
 -1 10 4 2.6 4
 -1 10 4 7.7 3.3
 1 10 -4 1.1 2.3
 -1 10 4 -1.2 4.7
 1 -10 4 7.5 5.5
 1 10 -4 -3.7 9.6
 -1 10 4 0 2.7
 -1 -10 -4 0.1 2.8
 -1 -10 4 -3.1 2.8
 1 10 4 3.1 6.9
 -1 10 -4 0.2 3.1
 -1 10 -4 -3.2 3.2
 1 10 4 4.1 25.2
 2 10 -4 54.99 9.5
 2 10 -4 60.99 8.9
 -2 -10 -4 38.8 9.4
 -2 10 4 66.19 9.1
 -2 10 4 56.39 8.6
 -2 10 4 59.19 8.2
 -2 10 -4 54.39 10.7
 2 10 4 45.7 7.8
 2 10 4 73.19 11.3
 -2 10 -4 57.29 10.6
 -3 10 4 58.89 7.8
 3 10 -4 29.6 6.9
 -3 10 4 48.9 7.9
 3 10 -4 44.7 7.7
 -3 10 -4 38.6 8.3
 3 10 4 42.5 7.4
 -3 10 -4 34.8 6.6
 3 10 4 52.89 8.7
 -3 -10 4 64.29 9.7
 0 11 4 2.6 3.9
 0 -11 -4 -0.4 2.3
 0 11 4 5.4 22.6
 0 11 -4 -3.6 2.8
 0 11 -4 4.8 3.7
 -1 11 4 -1.4 2.6
 -1 11 4 13.3 4.7
 1 11 -4 8.6 3.6
 1 11 -4 7.3 16
 1 11 -4 -1.5 2.5
 -1 11 4 0.5 3.5
 -1 -11 -4 1.4 3.2
 -1 11 4 0.3 7
 1 11 -4 0.4 5.1
 -1 11 -4 2.7 4
 -1 11 -4 6.5 5.2
 1 11 4 3 16.1
 -1 -11 4 -1.4 3
 -1 11 -4 5.1 4.8
 1 11 4 6.3 3.9
 2 11 -4 51.19 7.7
 2 11 -4 66.29 10.1
 -2 11 4 49.99 7.3
 -2 11 4 65.19 8.5
 2 11 4 67.19 13.4
 -2 11 -4 38.1 7.6
 -2 11 -4 58.59 9.1
 0 12 -4 116.19 15
 0 -12 4 97.69 11.3
 0 12 4 76.29 23.7
 0 -12 -4 97.09 12.1
 0 12 4 95.09 14.2
 0 12 -4 85.79 13.7
 1 12 -4 1.7 3.8
 -1 12 4 8.4 4.7
 1 12 -4 9.6 19.5
 -1 12 4 11.7 14.3
 -1 12 4 -1.3 4.3
 1 12 4 5.5 5
 -1 12 -4 18.2 5.9
 2 12 -4 2 3.2
 2 12 -4 0.8 3
 -2 12 4 10.1 6.1
 -2 12 4 6.5 3.9
 -2 12 4 3.7 3
 -2 12 -4 0.9 4.6
 -2 12 -4 3.4 4.3
 2 12 4 2.3 3.3
 0 13 4 3.2 29.4
 0 13 4 -2.1 5.7
 0 13 -4 -0.7 7.8
 1 13 -4 54.79 18.9
 -1 13 4 50.59 8.8
 -1 13 4 68.19 22.7
 1 13 4 60.29 10.1
 -1 13 -4 56.09 10.3
 0 14 4 146.39 24
 0 14 -4 74.89 19.7
 0 14 4 110.89 13
 1 14 -4 240.68 30.6
 -1 14 4 261.97 34.2
 -1 14 -4 269.67 23
 1 14 4 239.18 22.9
 0 0 5 -0.2 1.3
 0 0 -5 0.1 1
 1 0 -5 220.18 15.1
 1 0 5 218.28 16.5
 1 0 -5 201.68 15.6
 -1 0 -5 215.18 16.1
 1 0 -5 244.38 15
 -2 0 5 -2.1 1.7
 -2 0 5 4.4 2.1
 2 0 5 -1.7 1.7
 -2 0 5 -0.8 1.6
 -2 0 -5 0.2 1.1
 2 0 5 0.1 1.3
 2 0 5 5.1 3.1
 3 0 -5 57.79 9.2
 -3 0 5 56.99 8.7
 3 0 5 63.39 7.5
 -3 0 -5 47 6.9
 -3 0 5 52.19 8.2
 3 0 -5 52.29 6.3
 3 0 -5 49.8 6.3
 3 0 5 35.3 9
 -3 0 5 58.39 7.8
 3 0 5 57.19 8.5
 4 0 -5 -0.1 2.8
 -4 0 5 0 2.3
 4 0 5 -0.4 3.3
 0 -1 5 296.87 23.6
 0 1 -5 320.67 23.2
 0 -1 -5 378.86 23.3
 1 -1 5 193.98 15.4
 1 1 -5 207.48 14.4
 -1 -1 -5 210.68 15.4
 1 -1 -5 199.38 14.1
 -1 1 -5 215.48 15.2
 1 1 5 212.88 15.7
 2 -1 5 141.09 11.9
 2 -1 5 154.88 11.6
 2 -1 5 85.29 15.8
 -2 -1 -5 121.29 10.6
 -2 1 5 125.39 12
 -2 1 5 127.99 12.1
 2 1 -5 130.99 12.5
 -2 1 5 124.99 12.7
 -2 -1 5 118.89 11.6
 -2 -1 5 132.99 12.9
 2 1 5 121.49 11.6
 -2 1 -5 134.49 10.4
 2 1 5 133.39 11.2
 2 1 5 112.59 13.1
 -2 1 -5 127.59 11.4
 -2 1 -5 128.49 11
 3 -1 5 5 2.5
 3 -1 5 1.3 3.4
 3 1 -5 -0.3 1.8
 -3 1 5 1.1 2.4
 3 -1 5 7.8 4.3
 -3 1 5 4 3.1
 3 1 -5 2.6 1.5
 -3 1 5 -1.6 2.4
 3 1 -5 -0.2 3
 3 1 5 2 2.9
 -3 -1 5 0.5 2.5
 3 -1 -5 5 2.4
 3 1 5 3.3 3.8
 -3 -1 5 2.6 2.6
 -3 -1 5 3.1 3
 3 -1 -5 2.7 2.2
 -3 1 -5 5.2 2.8
 -3 1 -5 5.1 2.5
 3 1 5 3.6 2.1
 4 -1 5 -1.5 5
 -4 1 5 -3 2.9
 4 -1 5 7.8 4
 4 1 -5 -0.7 5.6
 4 1 -5 8.2 3.4
 -4 1 5 -3.2 2.4
 -4 1 5 1.4 2.2
 4 1 5 5 5.4
 4 -1 -5 4.3 3.1
 -4 -1 5 5.8 3.9
 -4 -1 5 1.4 4.3
 4 1 5 0.8 3.7
 0 2 -5 -0.5 0.8
 0 -2 5 -0.3 1
 0 2 -5 -0.6 0.8
 0 -2 -5 -0.2 1
 1 2 -5 4.1 1.3
 -1 -2 -5 3.7 1.9
 1 -2 5 2 1.5
 1 2 5 2.6 1.5
 1 -2 -5 2.9 0.9
 -1 2 -5 3.1 1.7
 -2 2 5 9.1 4.1
 -2 -2 -5 7.5 3.1
 2 2 -5 10.7 2.6
 2 -2 5 6.9 3.8
 2 2 -5 12 3.2
 -2 2 5 15.1 4.2
 -2 2 5 13.6 4.3
 -2 2 5 13.3 3.6
 2 -2 5 13.4 3.2
 2 -2 5 10 3.4
 -2 -2 -5 13 3.1
 -2 2 -5 13 3.4
 -2 -2 5 12.7 4
 -2 2 -5 9.4 3
 -2 -2 5 12.5 4.3
 -2 2 -5 16.7 3.5
 2 2 5 7.7 3.6
 2 2 5 16.1 3.5
 2 2 5 6.1 3
 -2 2 -5 9.6 2.3
 3 -2 5 5.4 5.5
 -3 -2 -5 -1.3 2.1
 -3 2 5 -0.8 2.2
 3 2 -5 -1.1 1.6
 3 2 -5 3.9 1.7
 -3 2 5 3 4.3
 -3 2 5 2.3 2.4
 3 2 -5 0.3 3.2
 3 -2 5 -3.5 2.7
 3 -2 5 -0.2 2.2
 3 2 5 -2 2
 -3 -2 5 -1.8 2.6
 -3 -2 5 3.9 3.8
 3 -2 -5 2.3 1.8
 3 2 5 2.4 2.8
 3 -2 -5 -2.6 1.4
 -3 2 -5 3.7 3.1
 3 2 5 -1.3 2.4
 -3 2 -5 -1.9 1.9
 -4 2 5 20.7 5.2
 4 2 -5 23.6 5.6
 4 -2 5 37.3 10.6
 -4 2 5 32 8.8
 4 2 -5 18.9 5.6
 4 -2 5 18.4 6.4
 4 2 5 24 9.4
 4 2 5 26.3 6.3
 4 -2 -5 30.7 6.7
 -4 -2 5 30.4 6.6
 -4 2 -5 27.1 6.4
 0 -3 -5 120.19 8.9
 0 -3 5 111.59 8.9
 0 3 -5 94.39 9
 -1 3 5 534.25 40.1
 -1 -3 -5 603.54 38.9
 1 -3 5 575.54 38.6
 -1 3 -5 557.54 39.1
 -1 3 -5 540.45 39.2
 1 -3 -5 550.64 37.4
 -1 -3 5 520.95 40.2
 1 3 5 523.55 40.5
 1 3 5 578.94 38.9
 -1 3 -5 525.85 38.2
 2 -3 5 146.09 11.6
 -2 3 5 128.19 13.2
 -2 3 5 121.79 10.9
 -2 -3 -5 124.69 11.2
 2 3 -5 113.29 10.5
 2 -3 5 136.29 12.3
 2 3 -5 140.89 13.1
 -2 3 5 120.49 12.6
 2 -3 5 130.69 14.9
 -2 -3 -5 119.59 12.8
 -2 3 5 128.59 13.6
 -2 -3 5 150.08 14.2
 -2 3 -5 134.49 12.2
 -2 3 -5 130.19 10.4
 2 3 5 127.89 11.4
 -2 3 -5 128.59 11.7
 2 3 5 123.99 12.3
 -2 -3 5 127.79 12.4
 2 3 5 114.79 11.6
 -2 3 -5 135.69 11.7
 2 3 5 119.19 13.2
 3 3 -5 12.4 4.6
 3 -3 5 16.3 4.5
 -3 -3 -5 10 3.4
 3 3 -5 15.5 3
 -3 3 5 8.9 3
 3 3 -5 10.6 3.5
 -3 3 5 17 6
 3 -3 5 26.6 7.4
 3 -3 5 16 5.5
 -3 3 5 8.2 3.8
 3 3 5 22.9 7.6
 3 3 5 8.7 4.1
 -3 3 -5 7.9 3
 -3 3 -5 18 4.6
 3 3 5 11.1 3.8
 -3 -3 5 6.7 3.3
 -3 -3 5 8.9 4.9
 3 -3 -5 12.6 3.5
 3 3 5 10.1 4.2
 -3 3 -5 7.3 3.3
 3 -3 -5 14.4 3.7
 -4 3 5 7.9 4.2
 4 3 -5 13.9 5.9
 -4 3 5 16 4.5
 -4 3 -5 12.1 3.8
 -4 -3 5 6.5 4.5
 4 -3 -5 13.3 4.1
 -4 3 -5 6.5 3.7
 4 3 5 12.7 7.2
 0 -4 5 -1.6 0.9
 0 4 -5 -0.3 1.1
 0 -4 -5 -0.8 1.1
 -1 4 5 122.39 12.3
 1 4 -5 147.89 14.1
 -1 -4 -5 127.19 10.8
 -1 4 5 135.89 11.9
 1 4 -5 105.99 10.2
 1 -4 5 127.69 10.4
 -1 4 5 121.19 11.5
 1 -4 -5 127.69 9.4
 -1 4 -5 135.49 11.1
 1 4 5 130.19 11.8
 -1 4 -5 127.89 11
 -1 4 -5 130.79 11.2
 -1 4 -5 101.79 11.1
 1 4 5 132.89 11.8
 1 4 5 123.99 10.6
 -2 -4 -5 2.4 2.3
 -2 4 5 1.5 3.5
 -2 -4 -5 6.5 3.2
 2 4 -5 1.8 2.3
 2 -4 5 3.9 2.2
 2 -4 5 6 3.4
 2 4 -5 1.4 1.7
 -2 4 5 5.3 3.1
 -2 4 5 2.8 1.5
 -2 -4 5 5 3.4
 -2 4 -5 3.3 2.7
 -2 4 -5 0.3 2.2
 -2 4 -5 3.6 2
 2 4 5 1 1.7
 2 4 5 0.6 2.7
 -2 4 -5 3.1 2.4
 2 4 5 2.7 2.5
 2 4 5 2.1 1.8
 3 -4 5 21 4.5
 -3 -4 -5 22.4 4.7
 3 4 -5 15.2 5.1
 -3 4 5 27.6 8.5
 3 -4 5 17.5 5.8
 -3 4 -5 20.2 4.5
 3 -4 -5 23.3 4.7
 -3 -4 5 24.5 11.5
 -3 -4 5 22.1 5.9
 -3 4 -5 18.1 5.5
 3 4 5 14.2 4.4
 3 -4 -5 28.5 5.6
 3 4 5 18.5 4.7
 3 4 5 20.7 5.8
 3 4 5 25.8 10.3
 -3 4 -5 13 4
 -3 4 -5 24.5 8.7
 4 4 -5 1.4 2.5
 4 4 -5 -0.1 3.7
 4 -4 5 -4.9 3.3
 -4 4 5 -0.1 2.9
 -4 4 5 -1.6 3.6
 4 4 5 -3.3 5.2
 4 -4 -5 1.8 2.8
 -4 -4 5 -1.9 3
 -4 4 -5 0.3 2.6
 -4 4 -5 -2.9 2
 4 4 5 5.6 5.6
 0 5 5 33.7 5.7
 0 -5 5 39.9 6
 0 5 -5 51.39 5.7
 0 5 -5 33.9 4.6
 0 5 -5 36.9 5.1
 0 -5 -5 44.4 4.8
 1 5 -5 114.69 10.2
 1 5 -5 115.29 10.5
 1 5 -5 108.99 10.4
 -1 -5 -5 112.09 10.3
 -1 5 5 106.69 10.8
 1 -5 5 107.19 9.4
 -1 5 5 109.49 11.8
 1 -5 5 99.89 10.6
 -1 5 5 129.39 10.9
 -1 -5 5 127.59 11.6
 1 5 5 103.99 10.6
 -1 5 -5 120.69 10.4
 -1 5 -5 111.09 10.7
 1 -5 -5 113.19 8.8
 -1 -5 5 107.39 12.1
 -1 5 -5 125.49 10.4
 1 5 5 102.49 11.2
 -1 5 -5 110.69 10.6
 2 5 -5 83.19 7.1
 2 5 -5 88.69 8.4
 -2 -5 -5 86.89 9.3
 2 -5 5 90.59 13.4
 -2 5 5 81.29 11
 -2 5 5 102.19 11.1
 -2 -5 -5 81.09 10.2
 2 5 -5 98.19 10.6
 2 -5 5 86.79 8.7
 -2 5 5 95.79 10.6
 -2 5 -5 93.09 10.5
 -2 5 -5 98.39 9.8
 2 5 5 95.69 10.9
 -2 5 -5 82.99 9.5
 2 5 5 83.39 9.8
 2 5 5 98.19 11.5
 -2 -5 5 95.49 10.7
 -2 -5 5 96.99 11.9
 2 5 5 76.59 8.6
 -2 5 -5 94.19 10
 2 -5 -5 83.69 7.8
 3 -5 5 -3.7 3.2
 3 -5 5 8.6 3.1
 -3 5 5 1.3 3.3
 -3 5 5 0.7 2.9
 3 5 -5 -3.7 2.7
 -3 -5 -5 1.4 2.9
 3 5 5 -5.8 5.2
 -3 5 -5 0 2.6
 -3 -5 5 -2.8 2.8
 -3 5 -5 -0.2 3.1
 3 5 5 3.5 3.3
 3 -5 -5 0.7 1.6
 3 5 5 0.9 4
 3 5 5 0.5 3.5
 -3 5 -5 7.1 4.1
 3 -5 -5 3.7 2.8
 4 5 -5 -2.6 2.9
 -4 5 5 0.3 2.7
 4 5 -5 -0.3 2.7
 -4 5 5 -0.8 2.4
 4 -5 5 -3.7 3.1
 -4 -5 5 0.9 3.7
 4 5 5 -0.7 4.7
 -4 5 -5 -0.1 2.7
 -4 5 -5 -3.2 2.5
 4 -5 -5 1.3 2.9
 4 5 5 4.5 4
 0 6 5 -7.4 4.2
 0 6 -5 -1.7 1.8
 0 6 -5 0.8 1.5
 0 6 -5 -2.3 1.6
 0 6 5 2.9 2.3
 0 -6 -5 1.2 1.3
 1 -6 5 28.6 6.1
 -1 6 5 32.9 5.3
 -1 6 5 31.1 5.9
 1 -6 5 29.9 4.1
 1 6 -5 31.4 5.1
 1 6 -5 28.4 5
 -1 6 5 28.1 6.1
 -1 6 5 29.2 5.7
 -1 -6 -5 31.3 4.7
 1 6 -5 25.8 4.9
 1 6 -5 32.9 4
 1 -6 -5 32.3 3.5
 -1 6 -5 34.3 5.5
 -1 6 -5 38.4 5.4
 -1 6 -5 36.9 5.1
 1 6 5 28.6 6.2
 -1 6 -5 31.7 5.5
 -1 -6 5 26.7 6
 -1 -6 5 42.1 8.2
 1 6 5 32.7 5.4
 1 6 5 33 8
 2 -6 5 -4.5 2.4
 -2 6 5 6.3 3.9
 2 6 -5 -0.2 2.6
 2 6 -5 3.5 2.1
 -2 -6 -5 -4.1 2.9
 -2 6 5 6.4 4
 -2 6 5 0.7 2.4
 -2 -6 -5 -0.2 2.1
 2 -6 5 2.7 1.9
 2 6 5 -1.9 2.2
 -2 -6 5 2.5 2.8
 2 6 5 2.2 2.9
 -2 6 -5 -4 2.1
 -2 6 -5 2.1 2.5
 -2 6 -5 -0.3 2.9
 -2 6 -5 1.3 2.1
 -2 -6 5 -0.6 2.9
 2 6 5 10.3 4.6
 -3 6 5 -1.5 2.7
 -3 6 5 1.5 3.1
 3 6 -5 0.2 2.7
 3 -6 5 2.6 2.7
 -3 -6 -5 14.5 4.4
 3 -6 5 1.5 3.8
 3 6 -5 2 2.6
 -3 -6 5 1.1 3.4
 -3 6 -5 -0.9 2.5
 -3 6 -5 2.8 3.7
 3 6 5 -0.9 4.6
 -3 6 -5 2.9 3.6
 3 6 5 -1.4 2.6
 3 -6 -5 0.2 1.6
 -3 6 -5 -2.5 4.5
 3 -6 -5 -3.9 3.3
 3 6 5 -4.6 3.3
 -4 6 5 21.1 5.4
 4 6 -5 23.8 6.5
 4 6 -5 10.5 4.1
 4 -6 5 19.8 6.4
 -4 6 5 19.6 5.5
 4 6 5 12.8 5
 4 6 5 14.1 5.1
 -4 6 -5 19.8 5.5
 -4 6 -5 23.2 4.5
 -4 -6 5 21.1 6
 0 7 -5 18.3 4.3
 0 7 5 21.4 4.2
 0 7 5 18.4 4.9
 0 -7 -5 20.9 4.3
 0 -7 5 23.4 5.5
 0 7 -5 22.8 4.8
 0 7 5 33.1 8.1
 0 7 -5 21.8 3.5
 -1 7 5 237.18 20.5
 -1 7 5 191.48 17.3
 1 -7 5 207.48 16.4
 -1 -7 -5 214.08 17.8
 -1 7 5 186.28 16.9
 1 7 -5 209.28 17.6
 1 7 -5 177.48 17.5
 1 -7 5 203.18 18.4
 1 7 -5 198.38 18
 -1 7 5 217.18 18
 -1 7 -5 214.28 18.5
 -1 -7 5 246.78 20.3
 -1 7 -5 207.08 18.4
 -1 7 -5 220.88 17.7
 1 7 5 218.08 22.2
 1 7 5 225.78 18
 1 -7 -5 196.98 15.7
 1 7 5 205.38 19.5
 -1 7 -5 208.48 16.1
 2 -7 5 17.3 5.4
 2 7 -5 13.8 4.4
 -2 7 5 24.2 6.7
 -2 7 5 14.4 5.1
 2 7 -5 19.9 4
 -2 7 5 21.3 6.6
 -2 -7 -5 14.3 4.6
 -2 7 -5 13.6 4.9
 -2 7 -5 19.4 4.9
 -2 7 -5 25.4 6.3
 -2 7 -5 21.3 5.2
 -2 -7 5 11.5 5.3
 -2 -7 5 20.6 6.4
 2 7 5 21.4 6.1
 3 -7 5 8.7 4.5
 -3 7 5 5.2 3.4
 3 7 -5 4.8 3.3
 3 -7 5 2.7 3.7
 -3 7 5 4.9 3.9
 -3 -7 -5 6.4 4.6
 3 7 -5 0.7 3.1
 -3 7 -5 3 3.2
 3 7 5 -2.2 2.5
 -3 7 -5 2 3.1
 3 -7 -5 1.5 2.1
 -3 -7 5 0.3 3.6
 3 7 5 1.4 3.4
 0 8 -5 -1.2 2.3
 0 -8 5 1.6 2.8
 0 8 -5 -0.5 2.1
 0 8 -5 -2.3 1.3
 0 -8 -5 0.9 1.8
 1 -8 5 45.9 8.9
 -1 -8 -5 47 6.7
 1 8 -5 54.79 7
 1 8 -5 53.19 7.8
 -1 8 5 36.4 6.7
 -1 8 5 47.9 6.9
 1 8 -5 40.5 7.6
 1 -8 5 53.39 5.8
 -1 8 5 51.69 10
 1 8 5 55.79 9
 -1 -8 5 46.6 9.1
 -1 8 -5 45.7 5
 -1 8 -5 52.59 8
 -1 8 -5 43.4 6.8
 1 -8 -5 48.4 5.4
 1 8 5 49.9 6.7
 1 8 5 46.2 13.7
 -1 8 -5 62.59 8.7
 -2 8 5 -3 2.4
 2 -8 5 2.6 2.5
 -2 8 5 4.4 3.7
 -2 -8 -5 -1.2 2.9
 -2 8 5 -6.6 3.3
 2 8 -5 0.2 2.9
 2 -8 5 3.8 4.6
 -2 -8 5 -4.1 4.1
 -2 8 -5 -3.4 2.3
 2 8 5 0.8 3.2
 2 8 5 0.1 3.3
 2 -8 -5 1.4 1.7
 -2 8 -5 -4 2.8
 -2 8 -5 4.2 3.7
 -3 8 5 27.4 6.8
 3 8 -5 25.6 6.6
 3 8 -5 31.8 8.8
 -3 8 5 32.8 7.5
 3 -8 5 36.2 8.2
 3 8 5 25.4 7.7
 -3 8 -5 26.6 6.5
 -3 8 -5 22.4 6.4
 -3 -8 5 39.7 8.6
 3 8 5 48.5 10.6
 0 9 -5 12.7 3.1
 0 -9 5 19.2 5.5
 0 9 5 6.1 4.9
 0 -9 -5 12.3 3.5
 0 9 -5 13.3 4.6
 0 9 5 39.4 16.5
 0 9 -5 10.4 4.4
 -1 9 5 13.5 4.9
 -1 9 5 14.8 5
 -1 9 5 9.7 3.4
 -1 -9 -5 13.7 4.3
 1 9 -5 5.8 6.4
 1 -9 5 9.2 5.2
 1 9 -5 7.7 3.5
 1 9 -5 13 3.3
 -1 9 5 15.6 6.4
 1 9 5 5.4 12.6
 -1 9 -5 17.9 5.6
 -1 9 -5 12 4.8
 1 9 5 9.8 3.3
 -1 9 -5 6.8 4.1
 1 9 5 11.1 5.6
 1 -9 -5 11.8 2.8
 1 -9 -5 10.2 2.2
 -1 -9 5 16.7 5.1
 -2 9 5 31 7.1
 -2 9 5 35.6 7.2
 2 -9 5 37.9 7.9
 -2 9 5 37.7 8
 -2 -9 -5 35.5 7.4
 2 9 -5 36.2 7.8
 2 9 5 35.2 7.2
 -2 9 -5 35.1 7.8
 2 -9 -5 38.1 5.3
 -2 9 -5 47.6 9.2
 -2 9 -5 42.2 8.3
 2 9 5 36.4 9
 -2 -9 5 31.3 7.6
 -3 9 5 3.8 3.4
 3 9 -5 -1.3 3.5
 -3 9 5 4.3 3.5
 3 -9 5 8.2 5.5
 -3 -9 5 -3.4 4.5
 3 9 5 7.2 4.3
 -3 9 -5 -0.1 3.7
 3 9 5 2.4 3.5
 -3 9 -5 -1.3 2.8
 0 10 5 1.5 20
 0 -10 -5 1.8 2.1
 0 10 5 0.1 3.5
 0 10 -5 -2.9 2.3
 0 -10 5 1.2 3.8
 0 10 -5 2.9 2
 -1 10 5 19.6 4.5
 1 10 -5 13.7 4.2
 1 10 -5 13 12.9
 1 -10 5 19.5 6.7
 -1 10 5 3.5 5.7
 -1 -10 -5 21.5 5.2
 1 10 -5 22 5.8
 -1 10 -5 9.7 5
 -1 10 -5 16.4 6.3
 1 10 5 15.4 6.6
 1 10 5 30.1 18.5
 2 10 -5 2.1 3
 -2 10 5 4.6 4.5
 -2 10 5 3.5 3.3
 2 10 -5 3.6 3.3
 -2 10 5 5.4 3.6
 -2 -10 -5 2.8 4.1
 2 10 5 1.4 3.1
 -2 10 -5 -5.9 4.4
 2 10 5 -0.6 3.1
 -2 10 -5 5.3 4.5
 -2 10 -5 7.8 3.8
 3 10 -5 2.7 3
 3 10 -5 2.7 2.7
 -3 10 5 7.6 3.5
 -3 10 5 10.8 3.7
 -3 10 -5 -0.3 2.4
 -3 -10 5 2.1 6.6
 3 10 5 6.8 3.7
 -3 10 -5 6.4 4.7
 3 10 5 2.7 3.6
 0 11 -5 4.5 5.5
 0 11 5 0.8 4
 0 -11 -5 12.1 3.5
 0 -11 5 5 4.4
 0 11 5 13.9 21.8
 0 11 -5 5.3 4.5
 1 -11 5 111.39 13
 1 11 -5 99.09 13.9
 -1 11 5 136.19 19.3
 1 11 -5 81.49 19.4
 1 11 -5 104.79 10.4
 -1 11 5 108.59 14.1
 -1 -11 -5 101.99 12.3
 1 11 -5 101.19 12.3
 -1 11 -5 119.99 14.4
 -1 -11 5 103.99 12.4
 -1 11 -5 111.19 13.5
 1 11 5 118.09 15.3
 -2 11 5 -3.1 4.7
 -2 11 5 2.4 2.7
 2 11 -5 0.1 2.6
 -2 11 5 0.1 4
 2 11 -5 3 3.3
 2 11 5 5.5 4.1
 -2 11 -5 0 2.9
 -2 11 -5 3 4.6
 0 -12 5 3 4.1
 0 12 -5 14 6.1
 0 12 5 -1.6 3.3
 0 12 5 -10.4 18.8
 0 12 -5 4.4 5.9
 -1 12 5 9.4 5.1
 1 12 -5 6.3 19.8
 -1 12 5 7.8 20.6
 1 12 5 9.2 4.4
 -1 12 -5 14.1 5.3
 -2 12 5 5.3 2.8
 -2 12 5 2.7 3.6
 2 12 -5 -2.5 2.6
 2 12 -5 -3.6 2.9
 -2 12 -5 5.4 4
 2 12 5 1 3.1
 0 13 -5 7.9 11.1
 0 13 5 0.4 4.8
 0 13 5 1.3 22.5
 -1 13 5 3.7 4.4
 -1 13 5 12.6 16.3
 1 13 -5 3 17.8
 -1 13 -5 -6.3 3.5
 1 13 5 3.8 4.4
 0 14 -5 2.3 13.6
 0 14 5 0.9 3.5
 0 0 6 5255.87 404.06
 0 0 -6 6180.68 407.26
 1 0 6 -0.3 1.2
 1 0 -6 0 0.8
 1 0 -6 0.1 0.5
 -1 0 -6 -1.1 1
 2 0 6 607.14 40.8
 -2 0 6 519.55 42.1
 -2 0 6 637.74 42.2
 -2 0 -6 580.24 39.7
 2 0 6 589.94 41.4
 2 0 -6 513.15 41.2
 2 0 6 555.14 43.5
 -2 0 6 502.85 41.6
 -3 0 -6 -1.3 2.2
 -3 0 6 -5.1 2.1
 3 0 -6 -1 1.3
 -3 0 6 3.4 3.7
 3 0 6 5.3 4.8
 -3 0 6 0.5 2
 3 0 6 2.2 2
 3 0 -6 -1.1 1.7
 -3 0 -6 -2.5 2.2
 3 0 -6 1.6 4.3
 -4 0 6 177.18 18.1
 4 0 -6 168.88 16.6
 -4 0 6 244.18 24.9
 4 0 6 190.08 18.8
 4 0 6 180.18 20.7
 0 -1 -6 -0.3 1
 0 -1 6 -0.4 1.3
 0 1 -6 -0.2 1
 -1 -1 -6 26.6 3.6
 1 1 -6 26.8 2.8
 1 -1 6 28.5 3.9
 1 1 6 31.9 4.3
 1 -1 -6 31.6 3
 -1 1 -6 31.8 3.6
 -2 -1 -6 9.9 2.8
 2 -1 6 7.9 3.2
 2 -1 6 9.7 4.4
 2 -1 6 9.8 3.1
 -2 1 6 5.9 3.6
 -2 1 6 7.5 3.2
 2 1 -6 9.1 3.2
 -2 1 6 7.7 3.2
 -2 1 -6 12.8 2.7
 -2 -1 6 14.7 4.4
 2 1 6 12.9 4.5
 2 1 6 8.2 2.7
 -2 1 -6 7.6 2.6
 2 1 6 13.7 4
 -2 -1 6 9.3 3.2
 3 1 -6 93.89 11.7
 -3 -1 -6 69.59 8.1
 -3 1 6 83.29 11.7
 3 1 -6 94.49 8.9
 3 -1 6 78.79 9.9
 -3 1 6 82.39 10.7
 -3 1 6 89.29 10.6
 3 -1 6 106.59 15
 3 -1 6 97.59 11.4
 3 1 -6 88.29 9
 -3 -1 6 78.69 10.5
 3 1 6 69.59 12.1
 3 1 6 99.29 11.6
 -3 1 -6 80.19 8.7
 3 1 6 91.19 10.1
 -3 -1 6 88.89 11.4
 3 -1 -6 95.79 9.2
 -3 -1 6 79.59 9.7
 3 -1 -6 87.49 9
 -3 1 -6 85.19 9.6
 4 1 -6 14.7 4.5
 4 -1 6 11 5.3
 -4 1 6 16 4.6
 -4 1 6 15.8 4.6
 4 -1 6 20.7 8.6
 4 1 -6 22.3 6.3
 -4 1 6 15.3 5.4
 4 1 6 15.9 5.6
 4 1 6 4.8 5.4
 -4 -1 6 8.1 3.8
 -4 -1 6 14.7 4.3
 0 2 -6 66.19 6.4
 0 -2 6 83.89 7.1
 0 -2 -6 66.69 6.2
 1 -2 6 19.5 4.2
 1 -2 6 23.8 3.5
 -1 -2 -6 17.2 3.2
 -1 2 6 16.8 4.1
 1 2 -6 14.5 2.2
 -1 2 6 6.3 2.9
 1 2 6 18.4 4.9
 -1 2 -6 13.8 2.8
 1 2 6 19.1 3.7
 1 -2 -6 15 2
 -2 -2 -6 439.86 29.3
 2 -2 6 410.06 29.6
 2 -2 6 440.06 33.3
 2 -2 6 371.06 30.2
 2 2 -6 352.96 30.2
 -2 2 6 394.46 32.1
 -2 2 6 397.06 29.9
 -2 2 6 367.86 30.8
 -2 2 6 401.96 31.5
 -2 2 -6 431.36 30.3
 -2 2 -6 397.26 28.5
 -2 -2 6 361.26 29.6
 2 2 6 453.45 33.1
 -2 -2 6 373.56 31.4
 2 2 6 393.16 30.2
 -2 2 -6 358.86 28.8
 2 2 6 393.16 30.2
 2 2 6 400.06 29.6
 3 -2 6 25.3 8.1
 3 2 -6 23.4 7.4
 -3 2 6 16.6 4.4
 3 2 -6 15.2 4.3
 -3 2 6 11.8 4.3
 3 -2 6 18.4 6.5
 -3 -2 -6 18.2 3.8
 -3 2 6 22.2 6.7
 3 -2 6 27.8 7.1
 3 2 -6 21.1 3.9
 -3 -2 6 14.4 4.5
 3 2 6 17.7 5
 3 -2 -6 12 3.7
 3 2 6 17.4 5.6
 -3 2 -6 20.6 4.6
 3 2 6 24.4 5.3
 -3 2 -6 26.8 5.4
 -3 -2 6 13.4 4.2
 3 2 6 19 6.2
 3 -2 -6 17 4.2
 -3 -2 6 14.2 5.1
 4 -2 6 14.1 6.7
 4 2 -6 5.3 5.4
 -4 2 6 1.8 2.8
 -4 2 6 5.5 3.5
 4 -2 -6 0.5 2.3
 -4 -2 6 6.5 5.9
 -4 2 -6 1.4 3
 4 2 6 5.6 5
 0 3 -6 1.7 1.6
 0 3 -6 1 1.3
 0 -3 -6 -0.7 1.1
 -1 3 6 265.37 19.8
 1 -3 6 260.57 19.5
 1 3 -6 245.98 17.9
 -1 3 6 248.98 20.3
 -1 3 6 210.28 19.3
 1 3 -6 250.77 19
 1 -3 6 257.77 18.5
 -1 -3 -6 250.37 18.5
 1 3 6 240.88 18.7
 1 3 6 217.28 19.7
 -1 -3 6 214.68 19.5
 -1 -3 6 254.47 20.7
 1 -3 -6 240.18 17.1
 -1 3 -6 235.38 18.7
 -1 3 -6 250.77 18.1
 -1 3 -6 229.38 18.2
 -2 3 6 22.5 6.2
 -2 3 6 18.4 5.3
 2 -3 6 32.5 7.1
 -2 -3 -6 23.4 4.6
 2 3 -6 17.2 4.8
 2 -3 6 15.1 5
 -2 3 6 17.6 6.9
 -2 3 6 22.7 3.8
 2 -3 6 27.9 4.4
 2 3 6 18.8 4.4
 -2 -3 6 18.6 4.1
 -2 -3 6 24.7 6.2
 -2 3 -6 16.6 3.2
 2 3 6 15.1 4.6
 -2 3 -6 25.7 4.8
 -2 3 -6 30 5.8
 2 3 6 14.3 4.9
 -2 -3 6 17.6 4.7
 2 3 6 29.8 7.9
 -2 3 -6 25 5
 3 -3 6 6.2 5.1
 -3 3 6 4.6 2.5
 3 -3 6 8.4 3.3
 -3 3 6 10.9 4.3
 3 3 -6 8.9 2.3
 3 3 -6 14.6 4.6
 3 -3 6 14.1 5.6
 -3 3 6 10.5 6.1
 -3 -3 -6 10.2 3.4
 -3 3 -6 6.9 3
 3 -3 -6 7.4 2.8
 -3 -3 6 8.9 4.3
 3 3 6 13.3 4.6
 3 3 6 1.9 3.1
 -3 -3 6 8 5.1
 3 3 6 4.6 3.9
 -3 3 -6 9 3.8
 3 3 6 9.4 4.2
 3 -3 -6 9.6 2.7
 -4 3 6 9.4 4.1
 4 -3 6 11.7 5.6
 4 3 -6 16.2 4.3
 -4 3 6 12.6 5
 4 3 -6 13.4 6.8
 4 3 6 8.2 4.6
 4 3 6 12.5 6.6
 -4 -3 6 13 4.6
 4 -3 -6 13.6 4.1
 -4 -3 6 13.7 5.3
 -4 3 -6 12.4 4.2
 0 -4 6 15.5 3.6
 0 4 -6 6.7 2.3
 0 4 -6 10.3 2.7
 0 -4 -6 7.4 2.1
 0 -4 6 6.9 2
 0 4 6 5.7 2.8
 -1 4 6 545.85 45.6
 1 4 -6 598.14 45.2
 -1 4 6 667.73 46.5
 -1 -4 -6 690.33 45
 1 -4 6 725.93 44.9
 -1 4 6 590.74 46.6
 1 4 -6 650.73 44.6
 -1 4 -6 639.04 44.5
 -1 -4 6 680.93 46.7
 1 4 6 661.03 45.1
 1 -4 -6 649.43 43.4
 -1 -4 6 533.85 46.5
 -1 4 -6 726.83 45.2
 -1 4 -6 569.34 45.1
 1 4 6 562.64 45.8
 1 4 6 676.83 46.6
 -2 4 6 407.26 32.2
 2 4 -6 407.66 30.8
 2 4 -6 390.36 28.2
 -2 4 6 428.06 31.6
 -2 -4 -6 367.76 28.9
 -2 4 6 361.26 27.3
 -2 4 6 376.26 30.8
 2 -4 6 387.36 33.9
 2 -4 6 375.66 29
 2 4 6 373.46 29
 -2 -4 6 381.16 31.9
 -2 4 -6 348.47 30
 -2 4 -6 357.36 29.5
 2 4 6 381.76 29.7
 -2 -4 6 422.26 30.9
 -2 4 -6 424.66 30.1
 2 4 6 375.86 31.8
 2 4 6 356.66 30.6
 -2 4 -6 429.26 30.1
 3 -4 6 126.09 12.7
 3 -4 6 115.79 13.5
 3 4 -6 131.89 11.9
 -3 4 6 119.39 13.8
 -3 -4 -6 116.19 12.5
 -3 4 6 123.39 14.5
 3 4 -6 100.89 13.8
 -3 4 -6 107.69 13.9
 -3 -4 6 119.79 15
 3 4 6 118.99 18.6
 3 -4 -6 117.29 11.7
 -3 -4 6 95.89 12.8
 3 -4 -6 125.79 11.4
 3 4 6 112.79 15.5
 -3 4 -6 137.99 14.6
 4 4 -6 2 2.1
 4 4 -6 -6.3 3.5
 4 -4 6 7.2 4.1
 -4 4 6 -0.4 2.8
 -4 4 6 -1.1 2.7
 -4 -4 6 5.3 3.5
 4 4 6 -1.9 3.9
 -4 4 -6 0.1 3.1
 -4 4 -6 -1.5 2.2
 4 -4 -6 -3.2 2.4
 4 4 6 -2.4 3.9
 0 5 -6 0.3 1.6
 0 -5 -6 -1 1.1
 0 5 -6 1.7 1.5
 0 5 -6 -0.2 1.3
 0 5 6 -0.7 1.7
 -1 5 6 308.67 24.5
 -1 5 6 307.47 25.5
 -1 5 6 257.67 23.4
 1 -5 6 288.87 24.4
 1 5 -6 294.07 23.3
 1 5 -6 345.47 24.2
 1 -5 6 285.07 22.8
 -1 -5 -6 312.07 23.5
 1 5 -6 322.07 23.6
 -1 5 -6 343.17 24.4
 1 5 6 356.66 25.9
 -1 5 -6 329.87 24.2
 -1 5 -6 307.87 23.4
 -1 -5 6 300.27 26.9
 -1 -5 6 270.07 24.5
 -2 5 6 8.4 4.6
 2 5 -6 13.3 2.1
 -2 5 6 3.3 3.7
 2 -5 6 6.1 2.5
 -2 5 6 7.8 4
 -2 -5 -6 8.3 3.4
 2 -5 6 5.5 3.7
 2 5 -6 12.9 4.5
 2 5 -6 7.9 2.6
 -2 5 -6 12.9 3.8
 2 5 6 9.9 4.1
 2 5 6 4.6 3.5
 -2 5 -6 9.6 3.8
 -2 5 -6 7.6 3.8
 -2 5 -6 10.3 3.6
 -2 -5 6 7.8 4
 2 5 6 11.8 3.4
 2 5 6 6 3.8
 -2 -5 6 10.6 4.5
 3 5 -6 -1.6 2.6
 3 5 -6 -2 2.1
 3 -5 6 4.1 3.4
 3 -5 6 2.6 3.7
 -3 5 6 5.6 3.6
 -3 -5 -6 3.9 2.9
 -3 5 6 -4 2.6
 3 5 6 1.3 2.9
 3 -5 -6 1 2.5
 3 5 6 0.9 3.3
 -3 -5 6 0.4 2.7
 3 -5 -6 -3.9 1.6
 -3 5 -6 0.6 3
 -3 5 -6 7.8 4.5
 3 5 6 -5.5 3.7
 -3 5 -6 2.8 2.5
 -3 -5 6 -3.2 3.4
 4 5 -6 8.8 4.6
 -4 5 6 4.1 3.6
 -4 5 6 5.1 3
 4 -5 6 7.2 4.4
 4 5 -6 0.8 2.6
 -4 5 -6 7.9 3.1
 -4 -5 6 1.5 3.2
 -4 5 -6 1.2 3.1
 4 5 6 6.9 5.1
 4 5 6 6.2 4.9
 4 -5 -6 6.9 3.5
 0 6 6 500.35 36.6
 0 6 6 468.25 35.8
 0 6 -6 428.06 34.6
 0 6 -6 445.16 34.5
 0 -6 6 413.46 35.1
 0 6 -6 529.55 34.5
 0 6 6 488.75 34.5
 -1 6 6 728.23 49.2
 1 6 -6 638.04 47.7
 1 6 -6 598.24 47.7
 1 6 -6 656.83 46
 1 -6 6 660.53 46.8
 -1 6 6 707.63 50.39
 1 -6 6 726.73 49.3
 -1 6 6 639.74 46.9
 -1 6 6 690.63 48.1
 1 6 6 686.33 50.09
 -1 6 -6 697.93 47.7
 -1 6 -6 694.33 48.7
 -1 -6 6 617.24 49.9
 1 6 6 623.44 48.2
 1 -6 -6 668.73 45.9
 -1 -6 6 633.14 49
 2 -6 6 8.9 4.5
 2 6 -6 2.1 2.1
 -2 6 6 6.8 3.9
 2 -6 6 4.7 2.5
 2 6 -6 3.7 3.5
 -2 -6 -6 2.4 2.3
 -2 6 6 6.8 3.8
 -2 6 6 2.8 3.6
 -2 -6 6 4.2 4.1
 -2 -6 6 -2.3 2.5
 -2 6 -6 1.6 2
 -2 6 -6 4.4 3.3
 2 6 6 11.3 5.1
 -2 6 -6 3.7 2.9
 -2 6 -6 6.9 3.3
 2 6 6 7 3.9
 2 6 6 -2.2 2.5
 3 6 -6 88.99 11.6
 3 -6 6 91.79 11.9
 -3 6 6 72.79 10.7
 3 6 -6 74.89 8.8
 -3 6 6 90.69 11.5
 -3 -6 -6 68.39 9.3
 3 -6 6 63.09 9.7
 3 6 6 101.19 13.7
 3 -6 -6 75.89 8.3
 -3 -6 6 55.99 9.5
 3 6 6 85.59 10.6
 3 6 6 59.69 10.5
 -3 6 -6 76.79 10.8
 -3 6 -6 75.19 10.8
 -3 6 -6 80.19 9.7
 3 -6 -6 76.09 8.8
 4 -6 6 84.59 11
 -4 6 6 87.69 10.6
 4 6 -6 112.89 12.6
 -4 6 6 95.49 11.1
 4 6 -6 97.49 9.6
 4 6 6 88.39 12.5
 -4 6 -6 88.69 9.4
 -4 -6 6 109.79 12
 4 6 6 82.39 10.8
 -4 6 -6 100.99 11
 0 7 6 0.2 2.6
 0 7 6 1.6 3.2
 0 7 -6 3.3 2.4
 0 -7 -6 1.5 1.5
 0 -7 6 3.9 2.9
 0 7 -6 -0.6 1.5
 0 7 6 -3.8 10.1
 0 7 -6 0.1 2.2
 -1 -7 -6 48.3 6.3
 1 -7 6 40.2 5.4
 1 -7 6 46.7 8.5
 1 7 -6 37.9 6.8
 1 7 -6 38.8 6.1
 1 7 -6 46.5 6.5
 -1 7 6 44.8 6.9
 -1 7 6 45.4 6.5
 1 7 -6 36.2 4.9
 -1 7 6 54.69 8.5
 -1 7 6 40.1 6.9
 -1 -7 6 52.29 7.5
 -1 7 -6 45 6.5
 -1 7 -6 30 5
 -1 7 -6 39.1 7.6
 1 7 6 46.8 8.1
 1 7 6 45.2 6.7
 -1 7 -6 47.7 8.5
 -1 -7 6 41.7 8.5
 1 -7 -6 47.3 4.9
 2 7 -6 0.4 2.2
 -2 7 6 -1.2 3.3
 -2 7 6 -0.1 2.1
 2 -7 6 3.7 4.3
 -2 -7 -6 0.6 2.7
 2 -7 6 3.6 2.4
 2 7 -6 0.3 2.7
 -2 7 6 2.7 2.8
 2 7 6 4.1 3.6
 -2 7 -6 2 3.1
 -2 7 -6 -1.2 2.4
 2 7 6 -0.1 2.9
 -2 -7 6 -1.2 2.8
 -2 -7 6 1.8 3.9
 -2 7 -6 -3.8 2
 -3 7 6 58.69 10.6
 3 7 -6 31.3 7.2
 3 7 -6 46.4 6.6
 -3 7 6 29.5 7.1
 3 -7 6 23.7 6.6
 -3 -7 -6 53.39 7.9
 3 7 6 58.99 9.4
 -3 7 -6 29.8 6.2
 3 -7 -6 43.8 6.6
 -3 -7 6 44.1 9.2
 3 7 6 29.8 7.8
 0 -8 6 -5.4 2.6
 0 8 6 5.1 3
 0 8 6 1.7 3
 0 8 -6 2.3 2.3
 0 8 -6 6.6 2.8
 0 8 6 4 13.2
 0 -8 -6 2.1 1.8
 0 8 -6 0.6 1.8
 1 -8 6 43.4 9.3
 1 8 -6 39.8 7.2
 1 8 -6 48.4 7.1
 -1 8 6 48.9 7.1
 1 -8 6 44.3 6
 -1 8 6 39.9 8.5
 -1 8 6 40.3 8.2
 -1 -8 -6 52.09 7.1
 1 8 -6 52.89 7.8
 -1 8 6 47.1 7
 1 8 6 51.99 6.7
 -1 8 -6 47.9 7.5
 -1 8 -6 51.09 8.1
 -1 8 -6 48.4 7.6
 -1 8 -6 46.2 5.2
 1 8 6 56.49 9.6
 1 -8 -6 46.4 5.4
 -1 -8 6 46.9 9
 -2 8 6 100.89 13.5
 2 8 -6 101.59 9.9
 2 8 -6 98.19 12.2
 2 -8 6 125.19 13.6
 -2 8 6 104.49 12.6
 -2 8 6 100.19 14.5
 2 -8 6 94.69 11.7
 -2 -8 -6 102.99 11.7
 2 8 6 110.99 14.9
 -2 -8 6 97.09 12.3
 2 8 6 129.39 15
 -2 -8 6 102.59 13.8
 2 -8 -6 102.09 10
 -2 8 -6 115.59 13.3
 -2 8 -6 102.89 11.6
 -2 8 -6 105.89 12.3
 3 8 -6 -2.5 4
 3 8 -6 5.6 4.4
 -3 8 6 10.3 4.4
 -3 8 6 2 3.3
 3 8 6 6.2 3.2
 -3 8 -6 9.5 4.9
 -3 -8 6 12.7 6
 3 8 6 9.4 5
 0 -9 -6 3.1 2.6
 0 9 6 -13.4 15
 0 9 -6 2.3 2.3
 0 9 -6 0.3 1.8
 0 9 6 -2.6 3
 0 -9 6 3.9 3.7
 0 9 -6 0.4 2.8
 -1 9 6 -3.6 2.5
 -1 9 6 -1.9 2.4
 1 9 -6 -2.8 2.3
 1 -9 6 -0.9 3.6
 1 9 -6 1.6 2.5
 1 9 -6 -1.2 5
 -1 9 6 0.7 5.9
 -1 -9 -6 0 2.3
 -1 9 6 -0.9 3.8
 1 9 -6 0.3 2
 -1 9 -6 1.4 3.7
 1 -9 -6 -0.7 1.7
 -1 9 -6 -1.8 2.9
 -1 9 -6 -0.5 2.2
 1 -9 -6 2.4 2.6
 -1 9 -6 0.6 3.1
 1 9 6 7.4 4.5
 -2 9 6 -0.2 3.8
 -2 9 6 -5.7 2.9
 -2 -9 -6 -1.4 3
 2 -9 6 6.4 4.4
 2 9 -6 0.1 2.4
 -2 9 6 2.1 2.9
 2 9 6 7.4 4.9
 -2 -9 6 -5.3 4.3
 -2 9 -6 6.3 4.4
 2 9 6 2.4 3.3
 -2 9 -6 1.2 3.5
 2 -9 -6 0.4 2.3
 -2 9 -6 -4.5 2.9
 3 9 -6 60.09 9.4
 -3 9 6 53.39 8.3
 -3 9 6 34.8 7.3
 3 9 6 65.49 10
 -3 9 -6 61.89 8.8
 -3 9 -6 55.89 10.1
 -3 -9 6 55.39 9.4
 3 9 6 58.89 9
 0 -10 6 154.68 16.2
 0 10 -6 155.38 17
 0 10 6 176.78 21.9
 0 10 6 101.89 21.2
 0 10 -6 161.58 12.7
 0 10 -6 138.09 19.7
 -1 10 6 391.26 34.2
 1 10 -6 397.46 29.4
 1 10 -6 391.36 33.6
 -1 10 6 353.46 28.5
 1 10 -6 313.77 30.6
 -1 10 6 365.56 32.8
 -1 -10 -6 354.56 29.9
 1 10 6 438.56 35.2
 -1 10 -6 389.06 31.7
 -1 -10 6 362.76 31.1
 -1 10 -6 368.76 31.5
 2 -10 6 -2.7 5
 -2 10 6 7.1 4.8
 -2 10 6 7.6 3.5
 2 10 -6 20.2 5.6
 2 10 -6 0.9 3.1
 -2 -10 -6 17.9 5.6
 -2 10 6 0.3 3.1
 -2 10 -6 10.8 5.4
 -2 10 -6 15.2 5.2
 -2 -10 6 15.1 7.3
 2 10 6 8.5 5.3
 -2 10 -6 2 6.6
 2 10 6 20 4.3
 -3 10 6 80.59 9.9
 -3 10 6 83.29 9.6
 3 10 -6 85.69 10.8
 3 10 -6 91.79 10.6
 -3 10 -6 88.79 10.3
 3 10 6 66.59 10.3
 -3 10 -6 88.29 10.6
 -3 -10 6 76.29 12.5
 3 10 6 62.89 8.9
 0 -11 -6 0.8 3.2
 0 11 6 -3.5 3.7
 0 11 -6 1.4 4.8
 0 11 -6 -1.8 3.7
 0 -11 6 0.2 4
 0 11 6 -8.6 16.4
 1 11 -6 27.7 10
 -1 11 6 25.1 7.4
 -1 11 6 33.1 18.5
 1 11 -6 27.3 4.9
 1 -11 6 27.9 7.3
 1 11 -6 21.1 17.8
 -1 -11 -6 10.8 8
 -1 11 -6 19.4 6.7
 -1 -11 6 28.1 7
 -1 11 -6 36.6 10.5
 1 11 6 17.9 6.3
 -2 11 6 4.4 5.3
 -2 11 6 -0.2 3.3
 2 11 -6 0.1 2.9
 2 11 -6 0 3.2
 -2 11 6 2.2 2.6
 -2 11 -6 7.2 4.7
 2 11 6 -0.8 2.9
 -2 11 -6 3.1 6.5
 0 12 -6 35.6 9.6
 0 12 6 37.9 22.4
 0 12 6 50.09 11.5
 0 -12 6 25.4 6.3
 -1 12 6 23.3 20.2
 1 12 -6 41.2 20
 -1 12 6 22 7.5
 1 12 6 24.1 7.9
 -1 12 -6 35.1 7.8
 2 12 -6 18.6 4.9
 2 12 -6 23.6 4.1
 -2 12 6 20.1 4.7
 -2 12 6 19.3 4.6
 2 12 6 18.7 5.8
 -2 12 -6 26.5 6.4
 0 -13 6 -7.5 3.6
 0 13 6 1.6 3
 0 13 -6 0.7 7.1
 1 13 -6 30.3 16.2
 -1 13 6 50.99 8.7
 -1 13 6 41.5 16.9
 -1 13 -6 35.3 7.9
 1 13 6 59.79 9.9
 0 14 6 22.9 6.5
 0 0 -7 -0.6 1
 1 0 -7 1807.42 131.19
 -1 0 -7 2088.89 132.59
 1 0 7 2137.29 135.69
 1 0 7 1882.91 133.59
 1 0 -7 1945.51 131.89
 -1 0 7 1864.41 134.59
 1 0 7 2084.39 133.39
 -2 0 7 2 2.5
 -2 0 7 -4.3 2.1
 2 0 7 -2.3 2.8
 2 0 7 1.2 2.7
 2 0 7 0.6 2.6
 -2 0 -7 -1.3 1.3
 3 0 -7 167.58 14.5
 3 0 7 123.29 17
 3 0 -7 169.28 17.7
 -3 0 7 175.38 16.3
 3 0 -7 183.58 16.5
 3 0 7 182.18 20
 -3 0 7 183.68 17.9
 3 0 7 174.78 17.2
 -3 0 7 167.88 16.9
 -3 0 -7 160.48 15.5
 -4 0 7 -1.7 2.8
 -4 0 7 -0.8 2.4
 4 0 -7 -0.5 2.7
 4 0 7 1.1 4
 0 -1 -7 7023.6 563.24
 0 1 -7 9153.48 573.24
 0 1 7 8643.04 568.14
 0 -1 7 7507.25 569.44
 -1 -1 -7 794.02 48.9
 -1 1 7 607.44 50.09
 -1 1 7 660.13 49.99
 1 -1 7 721.93 49.99
 1 1 -7 719.63 47.6
 1 -1 7 782.02 49.5
 -1 1 7 698.43 50.49
 1 1 7 671.83 49.5
 1 1 7 676.93 49.3
 1 -1 -7 645.74 47.7
 -1 1 -7 719.43 48.6
 1 1 7 718.53 51.19
 2 -1 7 32.4 5
 2 -1 7 27.2 5.8
 2 1 -7 25.2 6.4
 -2 -1 -7 28.4 4.3
 -2 1 7 35.2 7.5
 -2 1 7 28.3 6.4
 2 -1 7 31.3 7.9
 -2 1 7 28.9 5.9
 -2 -1 7 28.4 6.4
 -2 1 -7 28 4.1
 2 1 7 31 7.5
 -2 -1 7 32.2 6.5
 -2 1 -7 25.5 3.8
 2 1 7 32.4 7.3
 2 1 7 14.2 4.8
 3 -1 7 14 4.6
 3 1 -7 6.9 2.5
 -3 -1 -7 14.1 3.2
 3 -1 7 3.3 4.4
 -3 1 7 3 3.6
 3 -1 7 16.6 5.6
 -3 1 7 16 5.2
 3 1 -7 23.8 6.2
 3 1 -7 17.5 4.1
 -3 1 7 8 3.5
 3 1 7 18.2 7.3
 -3 1 -7 12.8 4.4
 3 1 7 15.8 5.2
 -3 -1 7 12.1 4.6
 3 -1 -7 15 3.4
 -3 -1 7 8.9 4
 3 1 7 23.9 7.4
 -3 -1 7 9.4 4.8
 -4 1 7 103.99 12.2
 4 -1 7 86.39 15
 -4 1 7 106.79 10.3
 4 1 -7 86.09 13.6
 4 1 -7 111.39 10.9
 4 -1 7 99.39 12.7
 -4 1 7 87.39 10.7
 4 -1 -7 91.59 10.3
 4 1 7 109.69 12.9
 -4 1 -7 113.69 12.6
 -4 -1 7 105.29 11.9
 -4 -1 7 100.79 11.7
 4 1 7 82.39 13.8
 0 2 -7 0 1.1
 0 -2 7 2.3 1.6
 0 -2 -7 0.9 1.2
 0 2 -7 0.6 1.2
 -1 2 7 951.3 64.79
 1 2 -7 927.81 64.59
 -1 2 7 976.4 67.09
 -1 2 7 875.91 66.99
 1 -2 7 873.61 63.99
 -1 2 -7 926.91 63.49
 -1 2 -7 992.2 63.69
 -1 -2 7 901.71 67.09
 1 2 7 1030.8 64.79
 1 -2 -7 805.92 62.49
 1 2 7 930.41 65.19
 -1 -2 7 951.4 65.39
 2 -2 7 468.15 39.3
 -2 2 7 491.15 36.7
 -2 2 7 504.95 46.7
 -2 -2 -7 483.85 35.8
 2 -2 7 527.65 36.8
 -2 2 7 457.45 38.2
 2 2 -7 493.65 37.5
 -2 -2 7 532.75 39.9
 -2 2 -7 454.55 35.2
 2 2 7 490.45 37.3
 -2 -2 7 524.45 37.2
 2 2 7 494.25 38.5
 -2 2 -7 504.65 35.8
 2 2 7 517.45 37.1
 3 2 -7 179.18 16.3
 -3 -2 -7 179.78 15.5
 -3 2 7 205.78 18.6
 3 -2 7 205.98 21.8
 -3 2 7 186.78 17
 3 -2 7 185.68 17.5
 3 2 -7 191.08 19.1
 -3 -2 7 194.58 19
 3 2 7 175.48 18.3
 -3 -2 7 183.78 16.4
 -3 2 -7 182.58 17
 3 -2 -7 186.68 15.7
 -3 2 -7 186.78 15.7
 3 2 7 218.08 25.6
 -3 -2 7 175.68 22.3
 4 -2 7 13.4 7.3
 4 2 -7 4.8 2.8
 -4 2 7 7.2 4.3
 4 -2 7 -3.5 3.5
 4 2 -7 3.9 5.4
 -4 2 7 1.3 3.2
 4 -2 -7 8.5 3.3
 -4 -2 7 8.5 3.5
 -4 2 -7 8.7 4.2
 4 2 7 11.4 5.2
 -4 -2 7 1.3 3.6
 4 2 7 5.3 5.1
 0 -3 7 637.64 49.9
 0 -3 -7 755.02 48.5
 0 3 7 640.64 50.29
 0 3 -7 760.12 48.9
 -1 -3 -7 36.3 4.8
 1 -3 7 32.5 5.4
 -1 3 7 39.5 7.4
 1 3 -7 35.9 4.2
 -1 3 7 34.4 4.9
 1 -3 7 40.5 5
 -1 3 7 39.8 6.4
 -1 3 7 48.4 9
 1 3 -7 32.2 5.8
 -1 3 -7 36.5 4.5
 1 3 7 44.5 5.6
 -1 -3 7 44.1 8
 1 -3 -7 44.7 3.9
 1 3 7 42.6 6
 -1 -3 7 29.8 6.3
 1 3 7 41.7 6.6
 -1 3 -7 47.8 5.6
 -1 3 -7 37.7 4.5
 -1 3 -7 35 5
 -2 3 7 1999 130.59
 -2 -3 -7 1792.42 127.69
 -2 3 7 2040.9 131.99
 2 -3 7 1750.32 131.79
 2 -3 7 1906.21 129.79
 -2 3 7 1938.31 130.49
 -2 3 7 1799.12 127.39
 2 -3 7 1857.91 128.29
 -2 3 -7 1887.41 127.59
 2 3 7 2072.19 132.49
 -2 3 -7 1876.61 128.69
 2 3 7 1675.23 128.79
 -2 -3 7 1610.34 127.79
 2 3 7 1892.91 130.19
 -2 3 -7 1980.4 127.19
 -2 -3 7 2037.9 129.69
 -3 3 7 195.98 16.8
 3 3 -7 220.58 17.8
 -3 3 7 211.78 20.5
 -3 3 7 201.88 19.6
 -3 -3 -7 185.48 19.6
 3 -3 7 195.08 22.4
 3 -3 7 230.38 20.7
 3 -3 7 183.78 18.4
 -3 -3 7 231.18 21.9
 3 3 7 220.18 18.9
 -3 3 -7 222.38 18.9
 3 3 7 185.98 18.4
 3 3 7 183.28 21.9
 3 -3 -7 207.28 17.8
 -3 3 -7 217.68 17.5
 3 3 7 212.08 19.9
 4 3 -7 0 2.6
 4 -3 7 5.3 4.2
 4 3 -7 3.5 4.2
 -4 3 7 1.8 2.9
 -4 3 7 5.9 3.5
 4 -3 -7 4.4 2.9
 -4 -3 7 3 3.3
 4 3 7 4.2 4.1
 -4 3 -7 0.9 2.8
 -4 -3 7 7.4 3.7
 4 3 7 4.3 4.7
 0 4 7 2.6 2
 0 -4 -7 0.2 1
 0 4 -7 0 1.4
 0 4 7 -0.4 1.3
 0 -4 7 2.4 2.6
 0 4 -7 3.2 1.9
 0 4 7 -0.4 1.9
 -1 4 7 212.38 20.2
 1 4 -7 227.68 20.1
 -1 4 7 252.37 21.9
 1 -4 7 261.07 21.4
 1 -4 7 246.68 19.8
 1 4 -7 275.87 19.6
 -1 -4 -7 243.48 19.7
 -1 4 7 247.88 21.4
 -1 4 -7 292.07 20.9
 -1 4 -7 269.67 19.8
 1 4 7 305.87 22.1
 -1 4 -7 270.77 19.9
 -1 -4 7 263.67 21.6
 1 4 7 252.67 20.1
 1 -4 -7 246.68 19
 -1 -4 7 261.07 22.4
 -1 4 -7 248.68 20.4
 1 4 7 252.07 21.4
 2 4 -7 80.29 7.6
 2 4 -7 71.69 9.3
 -2 -4 -7 71.89 8.3
 -2 4 7 76.89 10.1
 -2 4 7 74.29 10
 -2 4 7 66.39 10.6
 -2 4 7 64.99 6.8
 2 -4 7 77.29 8.5
 2 -4 7 71.89 9.6
 2 -4 7 67.49 12
 2 4 7 69.99 10.3
 -2 4 -7 68.69 8
 -2 4 -7 85.19 9.2
 2 4 7 81.69 9.1
 -2 -4 7 74.29 10.4
 2 4 7 76.09 10.1
 -2 -4 7 81.49 9.7
 -2 4 -7 80.09 9.6
 -3 4 7 132.69 15.3
 -3 4 7 122.59 14.3
 3 -4 7 112.49 13
 3 4 -7 132.39 14.7
 -3 -4 -7 116.49 12.1
 3 -4 7 156.58 15.5
 3 4 -7 136.09 12.5
 3 4 7 120.69 13.9
 -3 4 -7 120.29 12.2
 -3 4 -7 122.09 12.9
 -3 4 -7 138.89 14.9
 3 4 7 127.69 14
 3 4 7 117.99 13.2
 3 -4 -7 124.49 12.2
 3 -4 -7 132.29 11.6
 3 4 7 136.69 17.1
 -3 -4 7 138.69 16.2
 -3 -4 7 110.39 13.8
 -4 4 7 2.1 3.2
 -4 4 7 0.9 3.7
 4 4 -7 -0.9 2.1
 4 -4 7 5.6 4.7
 4 4 -7 4.4 4.2
 4 4 7 4.6 4.4
 4 -4 -7 -2.8 3
 -4 -4 7 5.4 3.8
 4 4 7 7.6 4.3
 0 5 7 120.19 12.8
 0 -5 -7 147.89 11.3
 0 5 -7 128.89 11.7
 0 -5 7 141.29 13
 0 5 7 110.59 11.8
 0 5 -7 142.29 11.8
 0 5 7 113.09 10.9
 -1 -5 -7 36.1 5.3
 1 -5 7 45.4 7
 1 5 -7 43.6 6
 1 5 -7 38.9 5.3
 -1 5 7 47.8 8.1
 -1 5 7 48.8 7
 1 5 -7 41.2 5.8
 1 -5 7 45 5.6
 -1 5 7 45.3 6.3
 1 5 7 48.3 7.4
 -1 -5 7 53.19 8.2
 -1 -5 7 54.39 7.5
 1 -5 -7 50.69 4.6
 -1 5 -7 41.7 5.8
 -1 5 -7 40.8 6.3
 -1 5 -7 42.9 6.1
 1 5 7 40 6.7
 -2 5 7 43 8.7
 2 5 -7 60.29 8.2
 -2 5 7 58.09 8.4
 2 5 -7 54.19 6
 2 -5 7 51.39 8.3
 -2 5 7 53.89 9
 -2 -5 -7 43.6 6.8
 2 -5 7 49.3 6.8
 -2 -5 7 57.49 8.5
 2 5 7 44.9 6.8
 2 5 7 57.49 9.2
 -2 -5 7 47.3 8.3
 -2 5 -7 46.9 6.6
 2 5 7 53.79 8.4
 -2 5 -7 34.6 7.3
 -2 5 -7 52.19 7.2
 3 5 -7 14.8 4.1
 -3 5 7 13.9 5.8
 3 -5 7 13.1 5
 -3 5 7 17.9 6.2
 3 5 -7 16.5 6.2
 3 -5 7 15.9 5.9
 -3 -5 -7 10.7 4.1
 -3 5 -7 28.7 5.7
 -3 5 -7 7.5 4.6
 -3 -5 7 19.4 5.5
 3 -5 -7 13.3 3.9
 3 5 7 11.8 4.8
 3 -5 -7 11.2 3.3
 -3 5 -7 14 5.5
 3 5 7 12.8 5.7
 3 5 7 13.9 7.3
 -3 -5 7 14.7 6.6
 -4 5 7 403.06 30.6
 4 5 -7 300.57 30.3
 4 5 -7 344.67 27.9
 -4 5 7 415.36 30.1
 4 -5 7 402.16 31.1
 -4 5 -7 387.76 30
 4 5 7 334.77 31.6
 -4 -5 7 385.56 31
 4 5 7 357.56 30
 0 -6 7 13.9 5.7
 0 6 7 -3.7 6.4
 0 6 -7 -0.5 1.8
 0 -6 -7 6.1 2.5
 0 6 -7 -2 1
 0 -6 7 -4 2.4
 0 6 7 -0.6 2.6
 0 6 -7 0 1.7
 0 6 7 -2.3 2.4
 -1 6 7 106.29 11.5
 1 6 -7 118.89 11.6
 -1 6 7 123.39 13.8
 1 -6 7 105.39 12.4
 1 6 -7 134.09 11.8
 1 -6 7 128.49 11.2
 -1 -6 -7 119.39 11.4
 -1 6 7 114.39 12.4
 1 6 -7 119.89 11.9
 -1 -6 7 128.79 13.2
 1 -6 -7 122.89 9.8
 -1 -6 7 130.29 14.4
 -1 6 -7 121.19 12.1
 -1 6 -7 119.39 11.5
 1 6 7 118.09 12.1
 -1 6 -7 113.59 11.9
 1 6 7 119.49 13.4
 -2 6 7 97.49 12.3
 2 -6 7 110.09 12.5
 2 6 -7 90.29 11.6
 -2 -6 -7 95.19 10.8
 2 6 -7 100.09 9.6
 -2 6 7 99.59 13.1
 2 -6 7 108.39 11
 -2 6 7 98.59 12.3
 -2 -6 7 110.89 13.9
 -2 -6 7 125.89 12.9
 -2 6 -7 100.69 11.3
 2 6 7 109.09 13.6
 -2 6 -7 101.59 11.8
 -2 6 -7 99.19 10.9
 2 6 7 85.89 12.3
 3 6 -7 151.98 17.5
 -3 6 7 177.58 18
 -3 -6 -7 133.59 15.8
 3 6 -7 166.98 14.9
 -3 6 7 169.98 17.6
 3 -6 7 184.98 18.6
 3 -6 7 143.89 16.5
 3 6 7 144.59 17
 -3 6 -7 175.38 18.1
 -3 6 -7 194.38 18.2
 3 -6 -7 143.79 15.5
 -3 -6 7 190.68 19.5
 -3 6 -7 174.08 15.7
 -3 -6 7 171.38 16.4
 3 6 7 217.38 21.1
 0 7 7 331.47 27.1
 0 -7 -7 340.67 26.7
 0 7 7 392.16 30.8
 0 7 -7 412.16 27.6
 0 7 -7 314.87 27.8
 0 7 7 346.27 30
 1 7 -7 458.35 32.1
 1 -7 7 372.76 32.3
 -1 7 7 377.46 31.5
 1 7 -7 377.06 28.9
 -1 7 7 423.56 32.5
 -1 -7 -7 474.75 31.9
 1 7 -7 472.95 32.3
 1 -7 7 390.26 30.3
 -1 7 7 418.66 34.3
 -1 7 -7 454.45 31.4
 -1 -7 7 378.96 32.7
 1 7 7 415.46 34.2
 -1 7 -7 375.56 32
 -1 -7 7 392.16 33.7
 1 7 7 403.06 31.4
 -1 7 -7 426.66 32.5
 -1 7 -7 374.16 30
 1 -7 -7 374.26 29
 2 -7 7 143.69 14.8
 2 7 -7 95.69 12.6
 -2 -7 -7 96.89 16.8
 2 -7 7 108.99 11.9
 2 7 -7 125.89 11.1
 -2 7 7 123.09 13.9
 -2 7 7 114.29 14.5
 -2 7 7 132.09 13.8
 2 7 7 151.28 16
 -2 7 -7 130.19 14.9
 -2 7 -7 122.29 12.7
 -2 -7 7 108.19 14.5
 -2 -7 7 124.29 14
 -2 7 -7 141.49 14.6
 2 7 7 118.09 14.6
 -3 7 7 432.66 34.1
 -3 7 7 447.26 34.2
 3 -7 7 421.36 34.5
 3 7 -7 405.06 30.6
 3 7 -7 367.36 33.5
 3 7 7 400.46 34.1
 -3 -7 7 390.96 35.1
 -3 7 -7 388.46 31.5
 3 7 7 390.76 35.1
 -3 7 -7 409.56 33.9
 0 8 7 1.9 3.6
 0 8 -7 1.1 1.9
 0 8 -7 -0.6 1.8
 0 -8 7 0.5 3.7
 0 8 -7 -1.6 1.4
 0 8 7 0.3 3.2
 0 -8 -7 2.8 1.8
 0 8 7 2.7 12
 -1 8 7 237.28 20.6
 -1 -8 -7 245.78 20.4
 -1 8 7 222.58 23.8
 -1 8 7 222.08 19.6
 1 -8 7 216.78 18.9
 1 8 -7 239.18 20.9
 1 8 -7 264.07 20.8
 1 8 -7 265.77 21.4
 1 -8 7 204.18 21
 -1 8 7 252.07 23.3
 -1 -8 7 270.57 22.6
 -1 8 -7 252.97 20.5
 1 8 7 248.08 23.6
 -1 8 -7 268.07 22.1
 -1 8 -7 236.58 21.3
 -1 -8 7 195.18 22.2
 1 8 7 218.08 19.3
 -1 8 -7 234.28 18.6
 2 -8 7 111.19 14.7
 2 -8 7 117.09 13
 2 8 -7 118.49 13.9
 -2 8 7 122.99 13.9
 -2 8 7 123.19 15.5
 -2 -8 -7 126.29 13.3
 -2 8 7 143.19 15.1
 2 8 7 153.98 15.6
 -2 8 -7 141.99 15.4
 2 8 7 127.19 16.2
 -2 8 -7 122.09 13.9
 -2 8 -7 130.49 13.6
 -2 -8 7 141.39 15.3
 -2 -8 7 156.78 17.2
 2 -8 -7 139.09 12.2
 3 8 -7 156.68 15.7
 3 -8 7 178.78 18.9
 -3 8 7 174.58 21.6
 3 8 -7 202.78 19.9
 -3 8 7 237.68 21.1
 -3 -8 7 209.98 20.5
 3 8 7 175.08 21.7
 -3 8 -7 245.58 22.1
 3 8 7 177.48 23.2
 -3 8 -7 176.38 20.8
 0 -9 7 561.94 41.6
 0 -9 -7 460.25 38.3
 0 9 7 519.05 44.2
 0 9 -7 516.05 40.9
 0 9 -7 523.85 38
 0 9 -7 517.95 40.5
 0 9 7 562.04 43.9
 -1 -9 -7 334.77 26.6
 -1 9 7 331.97 26.8
 1 9 -7 313.37 27.2
 -1 9 7 345.47 30.1
 1 9 -7 369.16 27.2
 1 9 -7 317.37 28
 1 9 -7 296.47 27
 1 -9 7 331.87 27.9
 -1 9 7 320.67 30.5
 -1 9 7 326.57 25.6
 -1 9 -7 328.07 23.8
 -1 -9 7 313.07 28.2
 1 9 7 298.27 31.1
 -1 9 -7 318.57 28
 -1 9 -7 329.67 28.3
 -2 9 7 293.27 24.2
 -2 -9 -7 273.27 24
 2 -9 7 268.97 24.8
 -2 9 7 264.87 24.3
 2 9 -7 244.88 23.9
 -2 9 7 291.37 26.1
 -2 9 -7 271.57 24.7
 -2 9 -7 297.17 25.6
 -2 -9 7 240.78 25.6
 2 9 7 254.87 23.3
 2 9 7 329.47 28.3
 -2 9 -7 289.77 23.7
 3 9 -7 44.8 9
 -3 9 7 48.9 7.7
 -3 9 7 25.8 5.7
 3 9 7 33.7 7.7
 -3 9 -7 40.8 7.8
 -3 9 -7 49.99 9.4
 -3 -9 7 29.8 8
 3 9 7 30.4 6.7
 0 -10 -7 0.7 2.6
 0 -10 7 6.2 4.6
 0 10 -7 0.4 3.2
 0 10 7 -3.6 2.7
 0 10 -7 -0.7 3.4
 0 10 -7 -2.3 2.7
 0 10 7 18.6 26.9
 1 -10 7 418.36 32.1
 1 10 -7 392.36 33.6
 1 10 -7 366.46 30.6
 -1 10 7 420.46 34.2
 1 10 -7 386.66 29.9
 -1 -10 -7 392.06 30.7
 1 10 -7 328.17 31.3
 -1 10 7 325.57 29.4
 1 10 7 465.65 36
 -1 10 -7 402.96 32.9
 -1 10 -7 310.57 30.8
 -2 10 7 5.8 3.9
 2 -10 7 10.9 5.6
 -2 10 7 14.4 5.7
 2 10 -7 4.8 3.2
 -2 10 7 6.9 3.5
 2 10 -7 5.4 3.8
 -2 -10 7 8.4 7.6
 -2 10 -7 10.7 4.2
 2 10 7 21.7 7.4
 2 10 7 2 3.4
 -2 10 -7 6.4 5.3
 3 10 -7 37.6 6.6
 -3 10 7 26.5 5.5
 -3 -10 7 43.2 9.5
 3 10 7 37 6
 0 11 7 909.81 72.99
 0 -11 7 961.3 68.99
 0 11 -7 801.22 69.79
 0 11 7 985.1 72.49
 0 11 -7 1040 69.79
 1 11 -7 -9.6 4.8
 1 11 -7 5.9 16.2
 -1 11 7 4.8 4.6
 -1 11 7 9.6 4.5
 1 -11 7 6 5.1
 -1 -11 -7 14.7 4.4
 -1 11 7 9.4 4.3
 1 11 -7 4.4 2.8
 -1 -11 7 10.1 4.5
 -1 11 -7 8.9 4.4
 -1 11 -7 -0.6 4.3
 1 11 7 9.3 5.8
 -2 11 7 8.1 3.2
 -2 11 7 5.9 4.1
 2 11 -7 7.7 3.5
 -2 11 7 12.6 5.8
 2 11 -7 3.2 3.6
 -2 11 -7 8.1 4.3
 2 11 7 2.4 3.6
 0 -12 7 -0.3 5.3
 0 12 7 -2.1 4.2
 0 12 -7 -0.4 4.1
 1 -12 7 154.08 16.9
 -1 12 7 172.88 18.5
 1 12 -7 181.98 29.1
 -1 12 -7 179.88 20.2
 1 12 7 227.88 25.5
 -1 -12 7 214.88 18.6
 2 12 -7 92.99 11.6
 -2 12 7 128.89 12.1
 -2 12 7 102.19 9.9
 2 12 -7 112.39 11.3
 -2 12 -7 116.39 12.5
 2 12 7 103.19 13.3
 0 13 -7 37.4 9.9
 0 13 7 15.5 6.6
 0 -13 7 21.6 5.5
 -1 13 7 203.58 18.8
 1 13 -7 187.98 26
 -1 13 -7 211.98 19.1
 1 13 7 193.58 20.3
 0 0 8 932.31 65.29
 0 0 -8 901.81 62.59
 -1 0 -8 -1.1 1
 1 0 8 0.7 1.6
 -1 0 8 -1.7 2.8
 1 0 8 1.2 2.9
 1 0 -8 0.3 0.7
 1 0 -8 1.5 1
 -1 0 8 3.2 2.4
 1 0 8 -2.3 1.8
 -2 0 -8 294.17 25.1
 -2 0 8 335.97 26
 2 0 8 315.77 25.2
 2 0 -8 264.97 24.1
 2 0 8 338.57 24.7
 2 0 8 244.78 33.6
 3 0 8 3.1 3.5
 3 0 -8 2.9 2
 -3 0 8 1.2 2.6
 3 0 8 -0.3 2.9
 -3 0 8 -0.6 2
 3 0 -8 -0.7 3.8
 -3 0 8 1.4 3.3
 -3 0 -8 -5.3 2.5
 -3 0 -8 3.4 2.7
 4 0 8 141.49 16.6
 4 0 8 151.38 18.6
 -4 0 8 163.08 15.2
 4 0 -8 166.98 14.9
 -4 0 8 193.88 17.1
 0 1 8 3.4 2.3
 0 -1 -8 -0.5 0.9
 0 -1 8 -1.5 2.4
 0 -1 8 -2.8 1.8
 0 1 -8 0.8 1.3
 1 -1 8 1086.79 79.59
 -1 -1 -8 1292.57 78.49
 1 1 -8 980 78.69
 -1 1 8 1017.1 79.59
 -1 1 8 1219.18 80.69
 1 -1 8 1112.09 84.09
 1 -1 8 1319.57 79.49
 1 1 -8 1093.49 76.99
 -1 1 8 1162.18 80.39
 -1 1 -8 1248.78 78.39
 -1 -1 8 1225.68 81.19
 1 1 8 1144.99 80.19
 -1 -1 8 1065.49 79.29
 1 1 8 1203.18 79.39
 1 1 8 985.2 80.29
 2 -1 8 73.39 8.4
 2 1 -8 69.69 8.7
 2 -1 8 66.59 8.8
 -2 -1 -8 69.49 7.4
 -2 1 8 67.39 8.8
 -2 1 8 70.69 9.8
 -2 1 8 65.49 9.3
 2 -1 8 64.49 10.2
 2 1 8 91.09 11.5
 -2 -1 8 89.29 10.4
 2 1 8 71.69 9.1
 2 1 8 72.39 8.7
 -2 1 -8 75.09 7.5
 -2 -1 8 58.89 8.6
 -2 1 -8 72.29 7
 -3 1 8 85.19 14
 3 1 -8 98.39 9.5
 -3 -1 -8 90.09 9.7
 3 1 -8 94.69 9.2
 -3 1 8 76.59 10.4
 -3 1 8 102.69 12.7
 3 -1 8 79.79 11.3
 3 -1 8 110.39 19
 3 -1 8 81.99 10.5
 3 1 -8 76.29 11.5
 -3 -1 8 96.59 12.3
 -3 1 -8 84.79 10.6
 3 -1 -8 98.19 9.3
 3 1 8 97.69 12.2
 3 1 8 98.89 14.1
 3 1 8 75.19 10.7
 -3 -1 8 71.49 11.1
 -3 -1 8 90.49 10.5
 -4 1 8 6.9 4.4
 -4 1 8 -1 2
 -4 1 8 7.7 3.6
 4 -1 8 2.2 5.5
 4 -1 8 -0.4 3.9
 4 1 -8 -10.4 6.4
 4 1 -8 7.3 3
 -4 1 -8 7.7 3
 -4 -1 8 11.3 4.2
 4 1 8 1.3 4.1
 -4 -1 8 9.5 3.9
 4 1 8 2.9 4
 4 -1 -8 12.5 3.3
 0 -2 8 624.54 45.8
 0 2 8 627.14 44.6
 0 2 -8 627.54 42.8
 0 -2 8 511.65 43.8
 0 2 -8 657.83 43.1
 -1 2 8 1265.27 94.49
 -1 2 8 1307.97 94.89
 1 2 -8 1163.48 91.59
 -1 2 8 1373.56 94.09
 1 -2 8 1272.17 94.19
 -1 -2 -8 1499.75 92.89
 1 2 -8 1461.65 93.99
 1 -2 8 1458.35 93.59
 1 -2 8 1230.18 99.99
 1 2 8 1598.04 96.59
 -1 -2 8 1397.86 94.59
 1 2 8 1328.27 95.19
 1 2 8 1312.47 93.69
 1 -2 -8 1569.94 91.89
 -1 2 -8 1385.06 92.69
 -1 -2 8 1220.98 95.09
 1 2 8 1276.47 93.59
 2 -2 8 52.29 10.7
 -2 2 8 53.79 7
 2 2 -8 50.49 7.4
 -2 2 8 34.8 7.6
 2 -2 8 53.29 7.7
 -2 -2 -8 62.39 6.7
 -2 2 8 50.99 7.8
 2 -2 8 54.09 7
 -2 2 8 57.69 9.4
 -2 -2 8 52.09 7.8
 2 2 8 53.29 9.3
 2 2 8 59.09 7.9
 -2 2 -8 45 5.9
 -2 -2 8 45.9 9
 -2 2 -8 46.8 6.3
 2 2 8 51.49 7.3
 -2 2 -8 49.3 7.1
 2 2 8 54.79 7.4
 -3 -2 -8 51.29 7.4
 3 -2 8 51.59 10.5
 -3 2 8 68.79 9.7
 -3 2 8 72.49 10.6
 3 -2 8 49.4 8.4
 -3 2 8 62.49 8.2
 3 2 -8 69.29 16
 3 2 -8 56.29 7.5
 3 2 -8 64.79 7
 -3 2 -8 69.79 7.3
 -3 -2 8 67.09 10.4
 -3 -2 8 74.99 10.8
 3 2 8 74.69 14.3
 3 -2 -8 70.99 7.4
 3 2 8 54.89 10.4
 -3 2 -8 60.39 8.5
 3 2 8 67.79 9.1
 -4 2 8 -1.6 2.5
 4 2 -8 -0.6 2
 -4 2 8 2.2 2.9
 4 2 -8 -7.5 5.5
 4 -2 8 -3.2 3.6
 4 2 8 -4.2 3.5
 -4 -2 8 2.5 2.9
 4 -2 -8 5.2 2.6
 -4 -2 8 -3 2.9
 4 2 8 1.6 5.5
 0 3 -8 1.3 1.5
 0 3 -8 1.5 1.4
 0 3 8 -2.5 2.5
 0 -3 8 -0.5 3
 0 -3 -8 -0.2 1
 0 3 8 1.1 2
 0 -3 8 0.8 1.9
 1 -3 8 24.3 4.5
 -1 3 8 21 5.2
 1 3 -8 26.2 4.4
 1 3 -8 20.4 3.2
 -1 -3 -8 18.4 3.9
 -1 3 8 20.5 5.1
 -1 3 8 21.5 5
 1 -3 8 25.4 5.7
 -1 3 8 21.3 4.4
 -1 3 -8 14 3.6
 -1 -3 8 18.1 5.5
 -1 3 -8 26.4 4.3
 1 3 8 21.4 4.9
 1 3 8 13.2 3.9
 1 3 8 19.5 4.8
 1 -3 -8 22.9 2.8
 1 3 8 21.9 4.8
 -1 3 -8 24.4 5
 -1 3 -8 17.3 3.6
 -1 -3 8 17.7 5.1
 -2 3 8 483.85 35.9
 2 -3 8 373.26 36.2
 -2 3 8 405.36 32.8
 -2 3 8 420.26 36.1
 -2 3 8 398.26 34.7
 2 3 -8 495.15 35
 -2 -3 -8 465.05 33
 2 -3 8 408.46 34.5
 2 -3 8 489.85 34
 -2 3 -8 461.55 32.7
 -2 3 -8 503.95 34.4
 2 3 8 430.36 33.7
 -2 -3 8 400.76 33.3
 -2 -3 8 443.16 36.1
 2 3 8 437.46 34.2
 -2 3 -8 453.75 32.3
 -2 -3 8 462.85 34.4
 2 3 8 423.46 34
 2 3 8 416.86 36.4
 -3 3 8 108.19 10.3
 3 3 -8 108.39 13.7
 3 -3 8 103.19 15.8
 3 -3 8 126.29 14.6
 -3 3 8 130.59 14.7
 3 -3 8 115.19 12.5
 3 3 -8 106.89 10.3
 -3 3 8 106.69 13.1
 -3 -3 -8 103.99 10.9
 3 3 -8 114.59 11.1
 -3 -3 8 114.79 13.7
 3 3 8 118.59 13.1
 3 3 8 103.99 12
 -3 3 -8 103.89 12.3
 -3 -3 8 117.29 14.7
 3 -3 -8 122.19 10.9
 -3 3 -8 104.49 10.7
 -3 3 -8 102.09 13
 3 3 8 121.19 16
 4 3 -8 4.8 2.7
 -4 3 8 3.1 3.4
 -4 3 8 1.9 2.9
 4 -3 8 7.3 4.1
 4 3 8 0 3.8
 -4 -3 8 5.5 3.4
 4 3 8 4.9 4.4
 -4 -3 8 5.6 4
 4 -3 -8 10.3 2.7
 -4 3 -8 6.9 3.5
 0 -4 -8 32.6 4.3
 0 4 -8 28 5.2
 0 4 -8 30.5 4.7
 0 -4 8 39.4 7.1
 0 4 8 30.8 6
 0 4 -8 46.2 5.4
 0 -4 8 61.19 10.1
 0 4 8 35.8 5.6
 0 4 8 26.8 6.1
 1 -4 8 409.36 29.5
 -1 4 8 450.35 30.7
 -1 -4 -8 399.66 29.1
 1 4 -8 381.56 29.7
 1 -4 8 341.97 30.3
 1 4 -8 351.16 28.4
 -1 4 8 405.06 31.1
 -1 4 8 360.16 29.9
 -1 4 8 425.36 31.9
 1 -4 8 461.85 35.5
 -1 4 -8 384.86 28.7
 -1 -4 8 416.36 32.2
 1 -4 -8 339.97 27.4
 -1 4 -8 390.86 29.7
 1 4 8 354.76 30.5
 -1 4 -8 429.26 29.2
 -1 4 -8 404.26 29.9
 1 4 8 383.86 30.8
 -2 4 8 2.4 1.8
 2 -4 8 -3.2 3.3
 -2 -4 -8 -0.7 2
 2 4 -8 0.4 1.8
 2 -4 8 5.2 4.8
 2 4 -8 -2.7 2.3
 -2 4 8 2.4 3.5
 2 -4 8 -0.8 1.9
 -2 4 8 5.6 4.4
 -2 4 8 0.6 2.6
 -2 4 -8 0.8 1.8
 -2 -4 8 1.6 3.3
 2 4 8 4.3 2.8
 -2 4 -8 -0.9 2.3
 -2 4 -8 0.6 2.1
 2 4 8 0.7 2.4
 2 4 8 -1.1 3.2
 -2 -4 8 2.5 3.7
 -2 -4 8 -2.5 3.1
 2 4 8 4 3.4
 3 -4 8 52.79 11.4
 3 4 -8 60.99 9.8
 -3 4 8 70.99 12.3
 3 -4 8 53.79 8.7
 3 4 -8 53.89 7.1
 3 -4 8 68.69 12.5
 -3 -4 -8 55.59 7.5
 -3 4 8 61.89 9.5
 -3 4 -8 51.69 8.5
 3 4 8 45.1 8.3
 -3 -4 8 49.7 9.8
 3 4 8 60.29 9.7
 3 4 8 49.9 8.5
 -3 4 -8 66.79 7.7
 3 -4 -8 59.89 7.4
 3 -4 -8 57.69 6.9
 -3 4 -8 57.99 8.9
 3 4 8 62.29 13.1
 -3 -4 8 63.49 10.6
 -4 4 8 258.47 22.1
 4 4 -8 245.28 23.2
 4 4 -8 248.68 20
 -4 4 8 249.08 20.9
 4 -4 8 217.68 22.3
 4 4 8 225.68 22
 4 4 8 243.48 23.8
 4 -4 -8 234.98 19.9
 -4 4 -8 267.77 21.8
 -4 -4 8 272.77 23
 0 5 -8 0 1.8
 0 5 -8 -0.1 1.6
 0 -5 8 2.9 2.9
 0 5 8 -3.9 2.2
 0 5 8 -2.9 1.6
 0 5 -8 -0.4 1.6
 0 5 8 5.3 3.1
 0 -5 -8 0.3 1.2
 1 5 -8 181.18 15.5
 -1 5 8 170.48 17.1
 1 -5 8 185.88 16
 -1 -5 -8 188.08 15.9
 1 -5 8 191.28 17.9
 -1 5 8 172.18 16.3
 -1 5 8 134.99 21.2
 1 5 -8 161.28 15.3
 1 5 -8 251.47 22.8
 1 -5 -8 222.18 14.6
 -1 -5 8 219.08 19.7
 1 5 8 208.68 18.5
 -1 5 -8 187.88 16.5
 -1 5 -8 167.38 16.3
 1 5 8 229.88 18.1
 2 -5 8 63.29 8
 -2 -5 -8 63.69 8
 -2 5 8 68.89 9.8
 2 -5 8 62.19 9.4
 -2 5 8 69.09 9.5
 -2 5 8 60.89 10
 2 5 -8 57.19 6.6
 2 5 -8 63.39 8.9
 2 5 8 51.89 8.9
 2 5 8 60.39 9.3
 2 5 8 55.49 8
 -2 5 -8 61.19 8.8
 2 5 8 71.39 10.7
 -2 -5 8 54.79 11
 -2 5 -8 68.79 8.6
 -2 -5 8 70.09 9.8
 -2 5 -8 68.69 8.2
 -3 5 8 561.24 42.3
 3 -5 8 547.75 42.8
 3 5 -8 587.74 39.1
 -3 -5 -8 500.05 41.9
 3 5 -8 491.65 41.7
 -3 5 8 576.24 42.8
 3 -5 8 535.55 45.5
 -3 5 -8 494.25 41.8
 -3 -5 8 489.15 42.8
 -3 5 -8 519.65 38.7
 3 -5 -8 521.45 37.5
 -3 -5 8 512.35 41.1
 -3 5 -8 510.05 41.4
 3 5 8 584.84 45.3
 3 5 8 477.65 40.5
 3 5 8 464.05 40
 0 6 -8 344.87 29.5
 0 6 8 377.46 27.7
 0 6 -8 334.27 27.2
 0 -6 8 312.07 29.4
 0 -6 8 297.77 28.9
 0 -6 -8 389.66 26.4
 0 6 8 336.17 29.2
 0 6 -8 378.96 27.3
 0 6 8 335.17 25.3
 1 6 -8 328.07 26
 1 6 -8 331.67 26.9
 1 -6 8 322.27 26
 -1 6 8 347.17 27
 -1 6 8 377.66 29.9
 1 -6 8 340.77 28.6
 -1 -6 -8 316.47 26.2
 -1 6 8 336.07 27.8
 1 6 -8 349.27 26.6
 1 -6 -8 296.67 24.4
 -1 6 -8 390.66 28
 1 6 8 315.77 28.7
 -1 6 -8 367.56 26.5
 -1 6 -8 368.56 27.7
 -1 -6 8 381.26 29.2
 -1 -6 8 326.87 29.6
 1 6 8 321.57 27.3
 2 -6 8 57.89 7.7
 -2 6 8 55.89 11.5
 2 6 -8 58.19 6.5
 2 -6 8 68.19 10.1
 2 6 -8 52.39 8.5
 -2 6 8 59.69 9.5
 -2 -6 -8 46.7 7.2
 -2 6 8 36.2 8
 2 6 8 64.79 10
 2 6 8 55.69 9.5
 -2 6 -8 55.69 8.3
 -2 -6 8 55.79 9.9
 -2 -6 8 61.79 9.1
 -2 6 -8 59.49 8.7
 -2 6 -8 60.09 8
 -3 6 8 12.2 5.5
 3 -6 8 15 6.1
 3 6 -8 1.3 2.9
 3 6 -8 2.9 3.3
 -3 6 8 3.4 3.4
 -3 -6 8 4.9 3.7
 3 6 8 13.2 6.3
 3 6 8 2.1 4.2
 3 -6 -8 4.7 3.3
 -3 6 -8 8.8 3.9
 -3 6 -8 12.7 5.1
 -3 -6 8 4.7 4.3
 0 7 8 -6.3 2.5
 0 -7 8 -0.3 3.5
 0 7 8 4.2 4
 0 7 -8 3.5 2.4
 0 7 -8 3.3 2.7
 0 -7 -8 -1.2 1.3
 0 7 -8 -3 1.6
 1 7 -8 8 2.9
 1 7 -8 12.7 4.3
 1 -7 8 14.7 3.9
 1 7 -8 3.8 2.6
 -1 -7 -8 9.9 3.9
 -1 7 8 8 3.5
 1 7 -8 5.4 2.9
 -1 7 8 7.1 4.3
 -1 7 8 11.2 5.3
 1 -7 8 10.9 4.7
 -1 7 -8 5.8 3.7
 -1 -7 8 13.1 5.3
 1 7 8 13.6 4.3
 -1 7 -8 22.9 5.8
 -1 -7 8 12.7 5
 -1 7 -8 9.3 3.4
 1 7 8 8.5 4.6
 1 -7 -8 4.3 2.3
 2 7 -8 101.39 9.7
 -2 7 8 95.39 14.6
 -2 -7 -8 109.29 11.4
 2 7 -8 94.89 12.2
 2 -7 8 94.49 11.4
 -2 7 8 109.39 13.1
 -2 7 8 73.29 16.1
 -2 7 -8 105.19 11.6
 -2 7 -8 101.29 12.4
 -2 -7 8 105.99 15.2
 -2 7 -8 103.39 12.6
 2 7 8 87.29 12.5
 -2 -7 8 114.59 13
 2 7 8 97.39 14.8
 -3 7 8 130.89 14.1
 3 7 -8 105.39 13.4
 -3 7 8 110.79 13.1
 3 7 -8 91.89 12.3
 3 -7 8 95.19 13.5
 -3 -7 8 107.29 11.9
 3 7 8 129.89 15.2
 -3 7 -8 100.39 13.1
 -3 7 -8 115.59 12.1
 -3 -7 8 120.49 14.5
 3 7 8 128.49 14.7
 0 8 8 1.8 3
 0 8 8 3.5 3.5
 0 8 -8 11.5 4.1
 0 8 -8 6.5 3
 0 -8 -8 7.3 2.7
 0 8 -8 8.1 3.1
 0 8 8 11 12.4
 0 -8 8 11 5.3
 1 8 -8 303.57 24.3
 -1 8 8 292.57 23.5
 -1 8 8 302.97 24.9
 -1 8 8 321.77 27.8
 1 -8 8 240.78 24.9
 -1 -8 -8 311.87 24.3
 1 8 -8 244.08 23.9
 1 8 -8 275.77 24
 1 8 8 259.37 26.6
 1 8 8 288.47 22.9
 -1 8 -8 303.57 22.7
 1 -8 -8 268.57 22.2
 -1 8 -8 281.87 25
 -1 8 -8 308.77 25.6
 -1 -8 8 310.37 26.3
 -1 -8 8 361.56 28.5
 -2 8 8 68.59 9.7
 -2 8 8 60.89 10.8
 -2 -8 -8 67.99 9
 2 -8 8 51.69 11
 2 8 -8 47 7.2
 2 8 -8 72.89 9.8
 2 -8 8 57.39 9.2
 -2 8 8 70.09 9.6
 -2 -8 8 65.99 10.3
 -2 8 -8 51.79 6.4
 2 8 8 80.79 11.8
 -2 8 -8 76.39 9.8
 2 8 8 56.49 9.3
 -2 8 -8 79.89 10.6
 -2 8 -8 61.79 10.3
 3 -8 8 73.49 11.3
 -3 8 8 81.09 10.3
 3 8 -8 92.79 11.6
 3 8 -8 78.19 8.7
 -3 8 8 69.79 10.2
 -3 8 -8 67.19 9.6
 3 8 8 81.69 11.3
 -3 -8 8 55.99 10.4
 -3 8 -8 71.99 10.7
 3 8 8 79.49 10.4
 0 9 -8 0.3 1.6
 0 9 8 0.6 3.1
 0 -9 -8 -3.5 2.1
 0 9 -8 1 2.6
 0 -9 8 -2.1 3.5
 -1 9 8 168.98 18.7
 -1 -9 -8 139.89 14.6
 1 9 -8 152.48 15.2
 -1 9 8 180.68 20.3
 1 9 -8 142.09 15.7
 1 9 -8 172.18 18.6
 1 9 -8 164.68 15.5
 -1 -9 8 156.48 16.8
 -1 -9 8 162.88 18.4
 -1 9 -8 150.18 16.2
 -1 9 -8 175.38 16.6
 -1 9 -8 135.79 12.5
 1 9 8 160.48 18.6
 -2 9 8 236.28 20.9
 -2 9 8 239.08 23.6
 -2 -9 -8 226.98 21
 2 9 -8 216.88 21.4
 2 -9 8 227.48 22.6
 -2 9 8 257.57 22.2
 -2 9 -8 234.58 22.4
 -2 9 -8 241.88 22.5
 2 9 8 227.78 23.8
 -2 9 -8 263.97 21.9
 -2 -9 8 243.48 24.1
 2 9 8 236.48 20.6
 -3 9 8 16.2 5
 3 -9 8 18.6 5.7
 3 9 -8 10.6 4.4
 -3 9 8 18.4 5.7
 3 9 8 7.2 3.7
 -3 -9 8 12.4 5.9
 3 9 8 10.1 4.5
 -3 9 -8 7.5 3.5
 0 10 -8 231.78 19.6
 0 10 -8 253.07 23.3
 0 10 8 281.87 26.3
 0 -10 8 228.28 22.7
 0 10 -8 246.08 22.5
 0 -10 -8 257.87 20.9
 1 10 -8 8.3 4.7
 1 10 -8 5.5 3.7
 -1 10 8 16.8 7
 -1 -10 -8 14.1 4.3
 -1 10 8 14.1 4.9
 1 -10 8 17.1 6
 1 10 -8 8.8 3.4
 1 10 -8 18.1 10.1
 1 10 8 8.2 4.9
 -1 10 -8 22 6.4
 -1 10 -8 9.5 4.1
 -1 -10 8 9.4 4.8
 2 10 -8 42.6 7.4
 -2 10 8 54.79 12
 -2 10 8 54.49 8
 2 10 -8 47.2 11.7
 2 -10 8 57.89 12.8
 -2 10 -8 53.29 9.7
 -2 -10 8 63.89 12.6
 2 10 8 26.6 8.5
 0 11 8 -2.1 3.9
 0 11 -8 -3.7 4.2
 0 -11 8 1.4 3.8
 0 -11 -8 6.6 3.8
 1 11 -8 311.37 24.1
 1 -11 8 299.77 26.6
 -1 11 8 292.37 27.9
 1 11 -8 293.87 33.9
 -1 11 -8 293.17 26.6
 1 11 8 307.07 29.6
 -1 -11 8 323.77 26.9
 2 -11 8 0.3 4.6
 2 11 -8 6 4
 -2 11 8 0.6 3.8
 -2 11 8 -1.3 3.7
 -2 11 8 -0.1 2.6
 2 11 -8 1.8 2.9
 -2 11 -8 3.7 3
 2 11 8 7 4.6
 0 -12 8 397.56 33.2
 0 12 -8 446.96 38.8
 1 12 -8 40.7 15.1
 -1 12 8 54.09 9.2
 1 -12 8 47.9 8.3
 -1 -12 8 48.3 7.8
 1 12 8 48.1 9.7
 -1 12 -8 73.79 11.6
 0 -13 8 2.7 3.7
 0 13 8 5.8 4.1
 0 13 -8 0.1 7
 1 13 -8 56.69 17
 -1 13 8 48.2 9.2
 1 13 8 64.89 9.9
 -1 13 -8 60.39 8.8
 0 0 9 -1.9 2.3
 0 0 -9 -0.8 1
 1 0 -9 387.76 27.3
 -1 0 -9 377.76 27.9
 1 0 -9 406.46 26.7
 1 0 9 393.66 29.2
 -1 0 9 401.86 30.5
 -1 0 9 368.56 28.6
 1 0 -9 324.27 28.4
 1 0 9 385.06 29.6
 -1 0 9 337.17 29.8
 1 0 9 416.16 31.7
 2 0 9 4.1 3.3
 2 0 9 -2.2 2.4
 2 0 9 -1.4 2
 -2 0 9 4 3.2
 2 0 -9 0.8 2.9
 -2 0 9 -0.4 3
 -2 0 -9 2.4 2
 -3 0 9 0.4 2.7
 3 0 9 -4.1 3.1
 -3 0 -9 -6.8 2.9
 3 0 9 -1.5 3.1
 3 0 9 -1 3.1
 -3 0 -9 -3.2 2.7
 -3 0 9 5.5 3.8
 -3 0 9 0.6 3
 4 0 -9 0.1 2.5
 -4 0 9 2.8 2.7
 -4 0 9 -4.4 2.5
 4 0 9 2.7 4.2
 4 0 9 -3.6 4.9
 0 1 9 98.49 10.6
 0 -1 9 82.59 9.7
 0 -1 9 65.39 10
 0 -1 -9 111.39 8.6
 0 1 9 95.09 9.9
 0 1 -9 90.29 8.3
 1 1 -9 833.12 61.09
 1 -1 9 956.3 64.19
 1 1 -9 839.92 58.69
 -1 1 9 858.71 62.49
 -1 1 9 896.81 62.19
 -1 1 9 903.91 62.69
 1 -1 9 814.32 61.59
 1 -1 9 874.31 61.09
 -1 -1 -9 929.51 60.19
 1 -1 -9 770.32 58.89
 -1 -1 9 884.51 61.49
 1 1 9 925.41 61.59
 1 1 9 828.82 61.39
 -1 1 -9 849.81 59.99
 -1 -1 9 791.52 62.39
 1 1 9 889.71 63.39
 -2 1 9 94.89 11.8
 -2 -1 -9 106.89 10.3
 -2 1 9 101.29 11.6
 2 1 -9 102.69 11.4
 2 -1 9 90.99 13.1
 -2 1 9 106.29 12.6
 2 -1 9 106.19 12.2
 2 -1 9 107.39 11.2
 -2 1 -9 124.39 10.4
 2 1 9 106.89 11.6
 2 1 9 91.59 13
 -2 -1 9 100.99 12.5
 2 1 9 107.79 11.9
 -2 -1 9 109.59 12.4
 3 -1 9 30.3 8
 -3 1 9 19.6 5.9
 -3 1 9 47.3 8.9
 -3 -1 -9 29.9 5.9
 3 -1 9 38.4 7.8
 3 1 -9 38.5 5.5
 3 1 -9 39.2 8.7
 3 -1 9 33 9.3
 -3 1 -9 33 6.1
 -3 -1 9 31.8 5.9
 -3 -1 9 48.4 10.1
 -3 -1 9 21.9 5.9
 3 1 9 32.5 7.2
 3 1 9 35.2 10.4
 3 1 9 27.5 7.7
 3 -1 -9 27.3 5.4
 4 -1 9 2.3 3.8
 4 1 -9 1.6 2.4
 -4 1 9 10.5 6.1
 -4 1 9 7.4 3.8
 4 -1 9 -9.4 5.1
 4 1 9 -3.5 3.6
 4 1 9 -3.2 3.7
 -4 -1 9 4 2.6
 -4 1 -9 7.5 3.9
 4 -1 -9 -0.4 1.9
 -4 -1 9 1.8 2.9
 0 -2 -9 2.1 1.4
 0 -2 9 1.8 2.1
 0 2 9 -0.9 2.4
 0 2 -9 0.5 1.3
 0 -2 9 -0.4 2.7
 0 2 -9 -1.5 1
 0 2 9 -3.7 1.8
 -1 2 9 44.2 7.5
 1 2 -9 61.89 7.3
 1 -2 9 60.99 9.2
 -1 -2 -9 60.99 6.5
 -1 2 9 59.19 8.1
 1 2 -9 60.19 5.7
 -1 2 9 66.79 7.8
 1 -2 9 51.99 7
 1 -2 9 49.7 7.7
 -1 -2 9 49.1 8.3
 -1 2 -9 62.69 6.5
 1 2 9 63.99 8.8
 -1 -2 9 55.59 7.4
 1 2 9 58.59 7.4
 1 -2 -9 51.89 5.4
 1 2 9 58.69 7.5
 -1 2 -9 58.89 7.1
 1 2 9 59.39 7.9
 -2 2 9 -1.3 2.1
 2 -2 9 1.1 4
 -2 2 9 -1.6 2.4
 2 -2 9 2.2 2.4
 -2 2 9 1.8 2.6
 2 2 -9 -0.4 2.2
 2 -2 9 1.3 3.1
 -2 -2 -9 -0.3 2.2
 -2 -2 9 -0.2 2.9
 2 2 9 4.1 2.7
 -2 2 -9 -0.7 2.3
 2 2 9 -1.5 2.6
 2 2 9 -4.9 2.9
 -2 -2 9 1.2 2.9
 -2 2 -9 3.4 1.9
 2 2 9 -2.8 3.3
 -2 -2 9 -2.2 2.8
 3 -2 9 11.8 6.1
 -3 2 9 5 4.3
 -3 2 9 5.4 4
 3 2 -9 3.7 2.4
 -3 -2 -9 8.2 3.4
 3 2 -9 9.5 5
 -3 2 9 4.8 2.8
 3 2 -9 5.5 2.9
 3 -2 9 2 3.7
 3 -2 9 1.4 3.7
 -3 2 -9 10.5 3.7
 -3 -2 9 8.7 4.7
 3 2 9 9.9 4.6
 3 2 9 1.8 4.1
 3 2 9 2.9 3.6
 -3 -2 9 5.2 3.4
 -3 -2 9 7.8 4.3
 -4 2 9 133.99 13
 4 -2 9 136.89 15.4
 4 -2 9 173.08 21.2
 4 2 -9 134.19 17.4
 4 2 -9 138.79 12.8
 -4 2 9 163.58 15.2
 -4 2 -9 130.89 14
 4 2 9 125.39 16.4
 4 2 9 111.49 13.8
 -4 -2 9 135.89 13.9
 -4 -2 9 127.39 13
 4 -2 -9 134.39 12.4
 0 3 -9 67.89 7.1
 0 -3 9 65.99 9.5
 0 3 9 56.49 8.1
 0 3 -9 59.39 6.6
 0 -3 9 57.49 8.1
 0 3 9 62.39 7.8
 0 -3 -9 68.69 6.6
 -1 3 9 54.19 7.1
 -1 3 9 37.7 5.9
 1 3 -9 31.1 5.6
 1 -3 9 42 6
 -1 3 9 49 7.5
 1 3 -9 44.9 5
 1 -3 9 30 7.7
 1 -3 9 42 7.8
 -1 -3 -9 44 5.5
 -1 3 9 54.89 7.6
 -1 3 -9 41.4 5.3
 -1 3 -9 41 5.8
 1 3 9 44.4 6.9
 1 -3 -9 48.1 4.7
 -1 -3 9 46.1 8
 1 3 9 38 6.1
 -1 3 -9 38.5 5.8
 -1 -3 9 50.79 7.3
 1 3 9 35.7 6.4
 1 3 9 50.89 7.6
 2 -3 9 29.6 7.4
 -2 3 9 40.8 5.8
 2 3 -9 28.5 6.1
 -2 -3 -9 45.3 6.1
 2 -3 9 38.4 6.3
 -2 3 9 31.4 7.2
 -2 3 9 27.1 7.5
 -2 3 9 37.1 8.1
 2 -3 9 39.7 8.8
 -2 3 -9 42.4 5.5
 -2 3 -9 37.4 6.3
 -2 -3 9 32.6 7
 2 3 9 33.6 7.1
 -2 -3 9 30.7 7.6
 -2 3 -9 31.2 5
 2 3 9 37.3 8.6
 2 3 9 47.8 10.9
 -2 -3 9 43.8 6.8
 2 3 9 30.7 6
 -3 3 9 65.09 10
 3 -3 9 49.99 11
 3 3 -9 51.49 9
 3 3 -9 60.39 7.5
 3 -3 9 62.99 9.6
 -3 3 9 54.19 6.3
 -3 -3 -9 52.49 7.5
 -3 3 9 37.5 7.8
 3 3 -9 52.29 6.7
 3 -3 9 52.59 10.9
 3 3 9 49.8 8.9
 -3 3 -9 64.59 9.1
 -3 3 -9 57.59 10.7
 3 3 9 60.99 13.1
 3 3 9 55.69 10.6
 3 -3 -9 69.19 7.1
 -3 -3 9 63.29 9.9
 -4 3 9 11.6 4.2
 4 3 -9 4.3 3.1
 4 -3 9 3.7 4
 -4 3 9 5 3.7
 4 3 9 8.1 5.8
 -4 3 -9 8.6 3.6
 4 3 9 15.5 5
 4 -3 -9 5.7 3.3
 -4 -3 9 9.9 3.9
 -4 -3 9 6.6 3.7
 0 4 -9 0.9 1.3
 0 -4 9 -1.4 3.3
 0 4 -9 0 2.1
 0 -4 -9 -0.1 1.2
 0 4 9 -2.2 2.4
 0 4 9 0.6 1.6
 0 -4 9 -0.5 3.1
 1 -4 9 84.49 9.2
 -1 4 9 80.99 12.9
 1 -4 9 77.99 11.5
 1 4 -9 93.99 8.5
 1 4 -9 82.19 9.6
 -1 -4 -9 86.09 8.7
 -1 4 9 80.79 8.3
 -1 4 9 96.29 10.1
 -1 4 -9 80.29 9
 -1 -4 9 87.69 11.2
 1 4 9 96.59 11.3
 -1 4 -9 95.89 9.7
 -1 4 -9 87.39 8.8
 1 -4 -9 75.59 7.4
 1 4 9 79.69 10.2
 1 4 9 82.19 10.1
 2 -4 9 9.5 6.8
 -2 4 9 4.5 3.7
 -2 -4 -9 -1.6 2
 2 -4 9 8.7 4.5
 2 4 -9 0.6 2.3
 2 -4 9 -0.5 2.2
 -2 4 9 -2.6 3
 -2 4 9 0.1 1.9
 2 4 9 0.5 1.9
 -2 4 -9 1.2 2.3
 2 4 9 -2.3 2.8
 -2 4 -9 4.6 3.1
 -2 4 -9 -0.8 2.3
 -2 -4 9 3 3
 2 4 9 3.9 3.4
 2 4 9 4.1 4.4
 -2 -4 9 -3.5 2.9
 3 4 -9 8.8 4.3
 3 -4 9 14.6 6.3
 -3 4 9 17.3 5.8
 3 -4 9 22.2 8.2
 3 -4 9 10.8 6.6
 -3 4 9 6.9 4.1
 3 4 -9 16.2 4.2
 -3 -4 -9 16.6 5.9
 3 -4 -9 10.8 3.3
 -3 4 -9 11.2 5
 3 4 9 10.4 4.4
 -3 -4 9 13.9 6.2
 -3 4 -9 5.3 4.6
 3 4 9 10.2 7
 -3 -4 9 13 6
 3 4 9 13.9 6
 0 5 9 348.67 28.1
 0 5 9 398.56 31.8
 0 5 -9 373.26 28.2
 0 -5 -9 397.86 27.8
 0 5 9 343.97 29
 -1 5 9 214.18 20.2
 -1 5 9 243.18 20
 -1 -5 -9 216.98 17.6
 1 5 -9 200.38 17
 1 -5 9 182.38 18.9
 1 5 -9 181.78 17.8
 1 -5 9 189.78 18.7
 1 -5 9 216.08 20.9
 1 -5 -9 194.38 15.8
 -1 5 -9 197.58 18
 1 5 9 199.78 19.3
 1 5 9 210.58 19.1
 -1 -5 9 247.48 20.4
 -1 5 -9 253.57 19.1
 2 -5 9 386.26 32.2
 2 5 -9 417.46 30.7
 -2 5 9 422.86 34.6
 -2 -5 -9 462.05 32.4
 2 5 -9 397.46 33.5
 -2 5 9 397.96 33.6
 -2 5 9 400.36 35.3
 2 -5 9 450.85 35.2
 -2 -5 9 413.66 33.7
 -2 5 -9 379.16 32.7
 -2 -5 9 439.06 35.8
 2 5 9 411.16 34.2
 2 5 9 485.75 36.6
 2 5 9 416.66 32.9
 -2 5 -9 352.96 32.5
 -2 5 -9 417.46 31.5
 3 -5 9 49.2 10.9
 3 -5 9 55.19 8.8
 -3 -5 -9 51.59 7.8
 3 5 -9 57.89 7.1
 3 5 -9 40.2 8.7
 -3 5 9 54.79 10.6
 -3 5 9 31.4 7.3
 3 -5 -9 39.3 7
 -3 5 -9 49.99 9.3
 -3 5 -9 52.79 8.1
 3 5 9 29.3 7.5
 -3 5 -9 43.9 9.1
 -3 -5 9 59.99 10.3
 3 5 9 52.19 11.6
 3 5 9 34.8 8
 3 -5 -9 54.09 6.4
 -3 -5 9 51.89 9.6
 0 6 -9 -0.1 2
 0 6 9 3.9 3.3
 0 6 -9 3.9 2.4
 0 6 -9 -1 2
 0 6 9 0.1 1.9
 0 -6 -9 -0.2 1.6
 0 -6 9 -0.1 3.7
 0 -6 9 7.5 4.8
 1 -6 9 9 4.9
 1 6 -9 18.4 4.3
 -1 6 9 20.9 5.3
 -1 -6 -9 18.8 4.7
 1 -6 9 17 4.5
 1 6 -9 19.6 4.4
 1 -6 9 16.8 5.9
 -1 6 9 13.9 5.2
 -1 6 9 18.3 5
 -1 -6 9 34.5 8.2
 -1 -6 9 21.4 6.3
 1 6 9 9.6 4.6
 -1 6 -9 8.8 3.4
 -1 6 -9 13 3.8
 1 -6 -9 19.6 3.5
 1 6 9 22.1 6.1
 -2 -6 -9 3.4 3.3
 2 -6 9 1.9 4
 2 6 -9 -0.8 2.1
 -2 6 9 3.1 4.7
 -2 6 9 -1.7 3.3
 2 -6 9 -3.1 3.4
 2 6 9 -5 2.7
 -2 6 -9 -0.2 2.2
 2 6 9 3.9 5.7
 -2 6 -9 -2.2 2.8
 -2 -6 9 2.2 4
 -3 6 9 4.7 3.7
 3 -6 9 -2.5 4
 3 6 -9 -0.7 2.4
 -3 6 9 0.9 3.1
 3 6 -9 -2.8 2.4
 3 6 9 9.3 4.6
 -3 6 -9 2.1 3.1
 -3 -6 9 0.6 3.5
 3 6 9 -3.4 3.6
 -3 -6 9 1.9 3.2
 0 7 -9 41.3 7
 0 7 -9 54.39 8.5
 0 -7 9 43.8 9.5
 0 7 9 50.59 10.2
 0 -7 -9 45.2 5.9
 0 7 -9 46.7 6.7
 0 -7 9 45.9 9.6
 0 7 9 43.5 7.2
 1 -7 9 5.1 4.5
 -1 7 9 -1 3.4
 -1 7 9 -2 3.3
 1 7 -9 2.9 3.3
 -1 7 9 1.8 2.9
 1 -7 9 -0.6 3.1
 1 7 -9 -2.9 2.6
 1 7 -9 2.2 2.2
 1 7 -9 0.7 1.9
 -1 -7 -9 2.9 2.8
 -1 7 -9 7.2 4
 -1 -7 9 -1.9 2.2
 -1 7 -9 -2.3 1.8
 1 7 9 5.7 4
 1 -7 -9 2.6 1.9
 1 7 9 -1.6 3
 -1 7 -9 3.7 2.9
 -1 -7 9 6.9 4.8
 -2 7 9 13.2 4.8
 2 -7 9 13.6 4.7
 2 7 -9 16.9 4
 -2 7 9 20.3 6.5
 2 -7 9 19.7 6
 -2 7 9 6.1 4.7
 2 7 -9 10 4.2
 -2 -7 -9 14.4 5
 2 7 9 7.5 4.5
 -2 7 -9 20.5 6
 -2 -7 9 10.9 5.3
 -2 7 -9 19.3 6.3
 -2 7 -9 14.4 5
 -2 -7 9 18 6.2
 2 7 9 17.3 6
 -3 7 9 102.09 15.1
 3 7 -9 132.49 11.7
 3 7 -9 92.29 15.1
 3 -7 9 157.68 16.2
 -3 7 9 111.29 15.1
 -3 -7 9 121.49 12.9
 3 7 9 124.59 14.1
 -3 -7 9 114.39 14.6
 3 7 9 124.39 24.4
 0 8 9 1.8 3.4
 0 8 -9 3 2.5
 0 -8 9 3.1 4
 0 8 -9 1.2 3.1
 0 8 -9 0.6 2.9
 0 8 9 5.5 4.2
 0 -8 -9 0.7 1.9
 1 8 -9 36 7.5
 -1 8 9 36.1 9.2
 1 8 -9 53.69 8.8
 -1 8 9 31.1 6.5
 1 8 -9 28.4 6.2
 -1 8 9 35.8 6.5
 1 -8 9 37.2 9.4
 -1 -8 -9 37.2 5.8
 -1 8 -9 21.7 5.6
 -1 -8 9 47 9.9
 -1 -8 9 36.6 9.5
 -1 8 -9 38.1 5.7
 1 8 9 34.1 5.4
 -1 8 -9 21.7 6
 2 8 -9 7 3.3
 -2 8 9 -0.5 2.8
 -2 8 9 3.7 5.1
 -2 -8 -9 -0.7 3.5
 2 8 -9 1.1 3
 -2 8 9 3.6 3.1
 2 -8 9 2.4 4.3
 -2 -8 9 3.8 4
 -2 8 -9 -4.5 3.8
 -2 -8 9 2.9 4.3
 2 8 9 2.4 3.1
 -2 8 -9 4.8 2.4
 -2 8 -9 -1.1 3
 2 8 9 2.9 3.6
 3 -8 9 8.5 4.9
 3 8 -9 6.9 3.8
 -3 8 9 4.3 3.5
 -3 8 9 7 3.7
 3 8 -9 11.8 4.8
 3 8 9 -1.8 3.2
 3 8 9 11.5 4.2
 -3 8 -9 1.6 4.1
 -3 -8 9 4.7 4.8
 0 9 -9 49 7.5
 0 -9 -9 46.1 6.5
 0 9 9 46 11
 0 -9 9 65.59 10
 0 9 -9 66.49 14.1
 0 9 -9 60.89 8.7
 1 9 -9 5 5.8
 -1 9 9 1.6 3.7
 1 9 -9 16.3 4.9
 1 9 -9 16.2 5.5
 -1 9 9 7.6 5.5
 -1 -9 -9 9 3.9
 1 -9 9 20.7 6.3
 1 9 -9 -1.2 4.3
 -1 9 -9 12.4 4.5
 1 9 9 12.9 5.7
 -1 -9 9 7.6 5.5
 -1 9 -9 14.3 5.2
 -1 9 -9 14.6 3.3
 -1 -9 9 9.5 6.8
 -2 9 9 228.78 22.4
 -2 9 9 230.18 19.8
 2 9 -9 205.08 20
 2 -9 9 234.38 21.5
 -2 9 9 215.98 20.3
 -2 -9 9 180.58 21.5
 2 9 9 206.78 18.6
 2 9 9 262.77 23.3
 -2 9 -9 191.88 20.3
 -3 9 9 1.3 2.7
 -3 9 9 7.6 3.5
 3 9 -9 1.2 2.8
 3 9 9 -0.1 3.4
 -3 -9 9 0.3 3.7
 3 9 9 1.8 2.9
 -3 9 -9 -2 2.4
 0 -10 9 1 3.8
 0 10 -9 3.4 3.8
 0 10 9 5 4.9
 0 10 -9 1.1 4.3
 0 10 -9 -0.9 2.1
 0 -10 -9 -4.8 3.4
 1 -10 9 51.59 11.1
 -1 10 9 72.59 11.3
 1 10 -9 75.19 11.3
 -1 -10 -9 55.29 8.6
 -1 10 9 52.99 8.7
 1 10 -9 68.89 8.6
 1 10 -9 47.4 13.3
 -1 -10 9 63.69 10.5
 1 10 9 77.79 11.8
 -1 10 -9 65.19 10.7
 2 10 -9 0 2.6
 -2 10 9 -0.8 4
 2 -10 9 2.6 4.7
 2 10 -9 3.1 3.4
 -2 10 9 -0.3 3.2
 -2 10 9 -5.2 2.9
 -2 -10 9 6 5.8
 -2 10 -9 2.4 3.3
 2 10 9 0.4 3.7
 0 -11 9 239.38 22
 0 11 9 260.47 24.9
 0 11 -9 195.18 20.4
 -1 11 9 77.29 13.6
 1 11 -9 76.89 9.9
 1 11 -9 44.6 15.9
 1 11 9 69.89 12.5
 -1 -11 9 75.59 10.6
 -1 11 -9 67.19 9.9
 2 11 -9 17.5 6.4
 -2 11 9 12.3 5.5
 -2 11 9 24.8 5.1
 -2 11 9 6.2 3.6
 2 11 -9 19.6 4.6
 2 11 9 12.6 5.3
 -2 11 -9 10.4 4
 0 12 -9 7.3 5.3
 0 12 9 4.8 5.3
 0 -12 9 1.8 3.4
 1 -12 9 12.4 4.5
 1 12 -9 -1.8 11.4
 -1 12 9 -3.6 3.8
 -1 12 -9 5.3 4
 1 12 9 -4.9 3.7
 -1 -12 9 1.7 2.8
 0 13 9 8.9 4.1
 0 13 -9 10.8 9
 0 0 10 -2.1 2.2
 0 0 10 2.9 2.7
 0 0 -10 1.1 1.4
 0 0 10 -1 2.5
 1 0 10 0 2.6
 -1 0 10 -0.5 2.1
 1 0 -10 -0.1 1.2
 1 0 10 -2.1 1.8
 1 0 10 0.2 2.8
 1 0 -10 1.9 1
 -1 0 10 -1.9 2.5
 -1 0 -10 -1 1.5
 -1 0 10 2.3 3.3
 1 0 -10 3.9 2.3
 -2 0 -10 244.88 19.1
 2 0 -10 207.18 20.3
 2 0 10 260.07 24.1
 -2 0 10 229.28 21.3
 2 0 10 239.88 21.6
 -2 0 10 225.18 21.3
 2 0 10 211.28 20.2
 -3 0 10 1.5 2.7
 -3 0 10 0.7 2.9
 3 0 10 2.3 3.5
 3 0 10 -2.6 4.3
 3 0 -10 0.2 2.2
 -3 0 -10 -0.5 3.9
 3 0 -10 -1.1 4.3
 -3 0 -10 0.6 3.6
 -3 0 10 -0.9 2.6
 3 0 10 1.5 3.9
 -4 0 -10 100.79 11.1
 4 0 10 96.69 11.9
 -4 0 10 113.99 11.3
 4 0 10 74.79 15.3
 4 0 -10 85.89 9.3
 -4 0 10 83.19 9.1
 0 -1 10 1.5 2.5
 0 -1 -10 1.8 1.7
 0 1 10 -4.2 2.5
 0 1 -10 1.8 1.6
 0 -1 10 -2.7 2.1
 -1 1 10 12.3 4.8
 1 -1 10 9.3 3.7
 -1 1 10 4 3.5
 1 -1 10 22.4 6.7
 1 -1 10 14.4 4.6
 1 1 -10 13.4 2.6
 -1 1 10 21.5 5.2
 1 1 -10 8.8 3
 -1 1 10 8.2 3.3
 -1 -1 -10 12.2 4.5
 -1 -1 10 17.5 4.2
 1 -1 -10 13.7 4.1
 1 1 10 10.2 4.5
 -1 1 -10 7.9 2.7
 -1 -1 10 7.8 3.9
 1 1 10 15.6 4.6
 1 1 10 13.2 4.3
 1 -1 -10 9.4 2
 1 -1 -10 12.7 3
 1 1 10 13.7 4.6
 -2 -1 -10 39.6 5.6
 2 -1 10 63.09 12.6
 -2 1 10 24.2 6.3
 2 -1 10 45 7.1
 -2 1 10 29.6 6.5
 2 -1 10 33.9 8.2
 -2 1 10 18.8 6
 -2 1 -10 40.3 5.4
 -2 -1 10 39.8 8.3
 -2 -1 10 30.7 7
 2 1 10 42.4 8.3
 2 1 10 49.3 10.7
 2 1 10 39.4 7.9
 3 1 -10 53.09 9.8
 -3 1 10 44.2 10.6
 3 1 -10 40.8 6.1
 -3 -1 -10 42.4 7.9
 -3 1 10 41.9 8.9
 3 -1 10 32.7 8.4
 -3 1 10 28.8 6.4
 3 -1 10 38.5 8.6
 -3 -1 -10 45.6 6.4
 -3 -1 10 38.7 8.2
 3 -1 -10 40.9 5.9
 3 1 10 27.5 9
 -3 -1 10 25.1 5.6
 -3 1 -10 25.5 6.2
 3 1 10 40.1 8.6
 3 1 10 38.5 8.2
 -3 -1 10 36.2 9
 4 -1 10 10.3 4.8
 4 1 -10 6.3 3.3
 4 -1 10 1.3 8.5
 -4 1 10 10.8 4.3
 -4 1 10 3 3.5
 4 1 10 19.4 6.1
 -4 1 -10 11.7 3.9
 -4 -1 10 4.5 3.5
 -4 -1 10 9.7 3.1
 4 1 10 12.1 4.8
 0 2 -10 300.37 23.3
 0 -2 -10 326.67 23.1
 0 -2 10 310.27 26.5
 0 2 10 319.87 25.6
 0 -2 10 271.07 24.9
 1 -2 10 669.03 50.69
 -1 2 10 706.43 49.9
 -1 2 10 641.44 48.4
 -1 -2 -10 709.13 47.1
 1 2 -10 633.04 45.7
 -1 2 10 665.13 52.19
 1 2 -10 695.93 48.3
 1 -2 10 630.84 49.3
 -1 2 -10 628.84 47.7
 1 2 10 560.34 50.59
 -1 2 -10 755.72 47.4
 -1 -2 10 621.94 48.4
 1 2 10 618.84 47.9
 -1 -2 10 654.43 50.19
 1 2 10 639.84 48.2
 1 -2 -10 682.43 45.9
 -2 2 10 67.19 10.2
 -2 -2 -10 81.49 8.3
 2 -2 10 65.69 12.9
 2 2 -10 68.39 9.5
 -2 2 10 78.09 11.8
 -2 2 10 67.69 10.2
 -2 2 10 73.59 8.8
 2 -2 10 66.19 10.1
 2 -2 10 65.99 9
 2 2 10 82.79 12.2
 -2 -2 10 84.59 9.4
 -2 2 -10 54.59 7.4
 -2 2 -10 75.89 9.4
 -2 -2 10 58.59 10.2
 2 2 10 72.19 10
 2 2 10 66.59 9.2
 -2 -2 10 51.89 8.9
 -3 -2 -10 385.86 33
 3 -2 10 469.95 37.7
 -3 2 10 537.55 38.5
 3 2 -10 395.76 32.5
 3 -2 10 374.26 35
 3 2 -10 469.65 33.3
 -3 2 10 467.65 36.3
 3 2 -10 440.56 36.1
 -3 2 10 429.16 33.5
 -3 -2 10 491.75 37.9
 3 2 10 446.26 36.5
 3 2 10 500.55 40.5
 -3 -2 10 463.25 33.9
 -3 -2 10 414.36 36.7
 -3 2 -10 424.56 34.9
 3 -2 -10 473.25 33
 3 2 10 371.06 34.9
 0 3 10 5.6 3.5
 0 -3 10 -0.4 3.2
 0 -3 -10 -1.8 1
 0 -3 10 -4 3.1
 0 3 -10 0.3 1.6
 1 -3 10 4 4
 -1 3 10 4.3 3
 -1 -3 -10 0.4 1.4
 1 3 -10 1.1 2
 -1 3 10 -2.3 1.8
 1 3 -10 -0.5 1.4
 -1 3 10 0.7 2.1
 -1 3 10 4.9 3.3
 1 -3 10 -3 2.7
 -1 3 -10 -0.7 1.7
 -1 -3 10 -2 3.1
 -1 -3 10 0.3 2.9
 1 3 10 1.7 3
 1 3 10 4.4 3.8
 -1 3 -10 0.8 1.5
 1 -3 -10 -0.5 1.2
 -1 3 -10 3.7 2.4
 -2 3 10 127.19 14.9
 -2 3 10 145.09 15.6
 -2 -3 -10 144.99 13.2
 2 -3 10 148.09 17.8
 2 -3 10 124.39 13.9
 -2 3 10 147.19 17
 2 3 -10 129.79 14.1
 2 -3 10 127.29 15.6
 -2 3 10 143.09 12.9
 2 3 10 131.39 14.7
 -2 -3 10 151.28 16.4
 -2 -3 10 116.89 13.9
 -2 -3 10 129.49 14.1
 2 3 10 166.78 14.9
 -2 3 -10 126.79 13.9
 -2 3 -10 156.98 14.6
 2 3 10 141.59 14.4
 2 3 10 148.59 17.2
 -2 3 -10 138.39 12.7
 -3 3 10 3.3 3.9
 3 -3 10 10.3 5.4
 3 3 -10 3.1 3.7
 3 3 -10 1.3 3.2
 3 3 -10 4 3
 -3 -3 -10 2 4
 -3 3 10 1.6 3
 3 -3 10 9.5 6.3
 3 -3 10 9.1 5.4
 -3 3 -10 12.6 5.1
 3 3 10 13.9 6
 3 -3 -10 12.7 3.8
 -3 -3 10 1.5 4.3
 3 3 10 8.6 5.6
 -3 3 -10 2.8 3.2
 -3 -3 10 8.8 5.1
 3 3 10 7.9 5.9
 0 -4 -10 300.47 21.1
 0 4 -10 265.07 21
 0 4 10 264.27 22.3
 0 -4 10 232.18 24
 0 -4 10 259.17 24.5
 0 4 -10 324.57 22.2
 0 4 10 295.07 23.3
 0 4 10 226.18 23
 0 4 10 242.38 20.9
 1 -4 10 408.46 37.1
 1 4 -10 492.45 32.9
 -1 -4 -10 479.85 33.2
 -1 4 10 417.66 32.6
 1 -4 10 436.66 33.8
 1 -4 10 482.55 36.1
 1 4 -10 427.66 34
 -1 4 10 457.45 35.7
 -1 4 10 393.16 35.2
 -1 -4 10 440.86 35.2
 1 -4 -10 434.26 31.6
 -1 4 -10 408.76 32.8
 -1 4 -10 511.75 35.1
 -1 4 -10 452.65 34.2
 1 4 10 399.66 39.4
 -1 -4 10 399.36 35.8
 1 4 10 486.45 36.2
 -2 4 10 5.5 4
 2 -4 10 -2 2.3
 -2 4 10 2 3.1
 -2 -4 -10 -1.2 1.9
 2 -4 10 5.8 4.4
 -2 4 10 1.8 4.3
 -2 4 10 0.4 1.9
 2 -4 10 1.4 4.5
 -2 -4 10 1.5 3.6
 -2 4 -10 7.1 3.5
 2 4 10 -3.4 3.1
 2 4 10 3.3 3.2
 -2 -4 10 -3.4 2.6
 -2 4 -10 -1.4 2.2
 2 4 10 -8.3 4.3
 2 4 10 3.4 3.7
 -2 -4 10 6.2 4
 3 -4 10 26.8 10.5
 3 -4 10 33.6 6.7
 -3 4 10 21.3 7
 -3 4 10 18.9 6.4
 3 4 -10 17.2 6.6
 3 4 -10 18.1 4.6
 3 -4 10 23.8 7.9
 3 -4 -10 30.2 4.4
 -3 -4 10 35.7 8.7
 -3 -4 10 23.6 7
 -3 4 -10 25.6 8.2
 -3 4 -10 27.8 6.7
 3 4 10 24.7 6.5
 3 4 10 31.7 9.8
 0 5 10 2.1 2.4
 0 5 -10 3.9 2.8
 0 -5 10 2.3 3.6
 0 5 -10 -1.1 2.1
 0 5 10 -3.7 2.7
 0 -5 10 11.2 5
 0 5 10 -3.2 3
 0 -5 -10 0.3 1.4
 0 5 -10 -1.7 1.6
 1 -5 10 44.7 7.5
 1 -5 10 15.7 7.5
 1 -5 10 33.2 8.2
 -1 5 10 29.4 5.1
 -1 5 10 35.2 6.7
 -1 5 10 44.9 8.8
 1 5 -10 22.5 5.5
 1 5 -10 38.3 5.6
 -1 -5 -10 29.2 5.6
 -1 5 10 27.4 7
 1 5 10 25.3 5.9
 -1 -5 10 37.5 8.2
 1 -5 -10 40.9 4.5
 -1 5 -10 20.6 5
 -1 -5 10 35.2 9.3
 1 5 10 28 7.3
 -1 5 -10 24.6 5.3
 2 5 -10 0.6 2.6
 -2 5 10 8.2 6.7
 2 -5 10 -2.8 5
 -2 5 10 0.8 6.6
 -2 -5 -10 0.3 2.6
 -2 5 10 2.6 3
 2 -5 10 -0.4 3.5
 2 5 -10 0.9 2.1
 2 -5 10 -5.2 2.6
 2 5 10 1.2 5.7
 -2 -5 10 2.5 4.1
 -2 5 -10 9.4 4.3
 -2 -5 10 2.3 3.8
 3 5 -10 6.9 4.1
 -3 5 10 12.8 6
 3 -5 10 6 5.5
 3 5 -10 10.6 3.6
 -3 5 10 12.2 4.6
 3 5 10 11.9 6.3
 -3 -5 10 15.8 6.8
 3 -5 -10 7.1 4.8
 -3 5 -10 7.3 4.2
 -3 -5 10 8.2 4.2
 0 6 -10 622.54 45.1
 0 6 -10 687.03 45.6
 0 -6 10 565.94 48.2
 0 6 10 581.84 42.8
 0 -6 10 659.03 47.4
 0 6 -10 561.74 44.1
 0 6 10 546.45 46.8
 0 6 10 603.74 45.3
 -1 6 10 5.9 4.4
 -1 6 10 1 2.8
 1 -6 10 -2 2.3
 -1 -6 -10 2.6 2.5
 1 -6 10 0.1 3.9
 1 -6 10 1.2 5.3
 1 6 -10 0.8 2.4
 1 6 -10 4 2.4
 -1 6 10 -0.1 2.4
 1 6 10 -6.3 3.8
 1 6 10 -4.4 3
 -1 6 -10 -1.5 2
 -1 -6 10 1.8 3.6
 -1 -6 10 0.6 3.8
 1 6 10 -0.4 2.4
 -1 6 -10 1.9 2.2
 -2 6 10 62.79 9.9
 2 -6 10 61.89 11.7
 2 -6 10 55.99 8.5
 -2 6 10 68.09 11.7
 -2 6 10 68.79 10.2
 -2 -6 -10 65.59 8.3
 2 6 -10 62.49 7.3
 2 6 -10 69.09 10
 -2 6 -10 90.09 10.6
 2 6 10 65.29 10
 -2 -6 10 38.7 9.4
 2 6 10 64.79 10.8
 -2 -6 10 51.49 9.9
 -2 6 -10 66.79 9.2
 -3 6 10 3 3.8
 3 6 10 -3.4 4.2
 3 6 10 8.9 5.1
 -3 6 -10 6.4 3.4
 -3 -6 10 5.4 4.3
 0 -7 10 -4 3.7
 0 7 -10 -2.6 2.4
 0 7 -10 6.6 3.2
 0 -7 -10 -1.5 1.8
 0 -7 10 -0.1 3.3
 0 7 10 6.8 4.4
 0 7 -10 3.9 3
 0 7 10 -5.5 3.7
 1 7 -10 15 4.3
 -1 -7 -10 20.4 5.3
 -1 7 10 23.9 4.8
 -1 7 10 21.7 6.8
 1 7 -10 14.8 4.4
 -1 7 10 21.9 6.5
 1 -7 10 23.4 7.3
 1 7 -10 16.4 3.6
 1 7 -10 15.7 4.9
 -1 7 -10 27.9 5.9
 -1 7 -10 13.8 5.2
 -1 7 -10 15.5 4.8
 1 7 10 13.5 5.2
 1 7 10 16.4 4.9
 -1 -7 10 26.7 8.3
 -1 -7 10 18.5 6.3
 2 7 -10 63.49 7.1
 2 7 -10 58.79 9.6
 2 -7 10 56.49 9.6
 -2 -7 -10 62.99 8.5
 -2 7 10 72.19 11.8
 -2 7 10 66.09 9.6
 -2 7 10 77.19 13.2
 2 -7 10 45.9 10.6
 -2 7 -10 52.79 7.5
 -2 7 -10 66.99 9.5
 2 7 10 75.09 10.6
 -2 -7 10 73.59 11.3
 -2 7 -10 67.09 10.4
 2 7 10 76.09 11
 3 7 -10 4.2 4
 3 7 -10 0.7 2.7
 3 -7 10 -1.8 4.7
 -3 7 10 -2.3 2.7
 -3 7 10 6.6 3.3
 -3 -7 10 0.1 3.4
 -3 7 -10 2.7 2.4
 -3 -7 10 -2.7 3.7
 3 7 10 -3.2 3.3
 3 7 10 1.7 3.1
 -3 7 -10 3.2 3.8
 0 8 -10 523.35 42
 0 -8 10 537.85 43
 0 8 10 557.14 46.7
 0 -8 10 452.85 42.6
 0 -8 -10 523.45 39
 0 8 10 445.46 39
 0 8 -10 606.04 41
 0 8 -10 585.24 40.3
 1 8 -10 16.5 4.8
 -1 -8 -10 18.7 5
 1 8 -10 13.5 4
 -1 8 10 11.7 4.7
 1 8 -10 7.9 3.9
 -1 8 10 9.4 6.2
 1 -8 10 24.5 6.9
 1 8 -10 13.3 4.5
 -1 -8 10 19.6 7.2
 -1 8 -10 15.8 5.5
 -1 8 -10 11.2 5
 1 8 10 29.3 8.3
 -1 8 -10 14.6 3.9
 -1 -8 10 6.3 4.4
 1 8 10 10.3 3.4
 -2 -8 -10 248.98 23.8
 2 8 -10 289.27 25.9
 -2 8 10 284.87 24.8
 -2 8 10 303.07 25.9
 2 8 -10 292.87 22.2
 2 -8 10 312.37 27.6
 -2 8 10 288.77 27.7
 -2 8 -10 294.27 26.2
 -2 8 -10 311.87 22.6
 -2 -8 10 307.17 26.4
 2 8 10 312.57 25.6
 2 8 10 239.98 25.9
 -2 8 -10 291.27 26.2
 -2 -8 10 301.07 27.8
 3 -8 10 20.9 6.2
 -3 8 10 20.4 4.7
 3 8 -10 6.7 3.9
 3 8 -10 15.1 4.7
 -3 8 -10 12.6 4.4
 -3 -8 10 20.9 5.8
 3 8 10 14.2 4.7
 3 8 10 19.1 5.3
 0 -9 -10 -2.2 2.5
 0 9 -10 0.2 3.2
 0 9 -10 1.2 2.2
 0 9 -10 6.1 3.8
 0 9 10 -1 2.9
 -1 -9 -10 2.3 3.4
 -1 9 10 -0.6 4.3
 1 9 -10 -2.3 4.6
 -1 9 10 -1.3 3.1
 1 9 -10 -6.6 4.4
 1 -9 10 -4.6 4.1
 1 9 -10 -1.5 2.4
 -1 -9 10 0.6 3.6
 -1 -9 10 6.1 5.7
 -1 9 -10 -1.2 3
 -1 9 -10 8.9 4
 -1 9 -10 -1.3 2.1
 2 -9 10 6.6 8.7
 2 9 -10 2.8 2.8
 -2 9 10 9.4 4.3
 -2 9 10 1.7 6.3
 -2 9 10 0 3.9
 2 9 10 6.7 3.7
 2 9 10 8.7 5.1
 -2 -9 10 13.4 6.8
 -2 9 -10 6.9 3.6
 0 -10 -10 -6.5 3.4
 0 -10 10 -1.3 3.6
 0 10 -10 -0.7 2.9
 0 10 -10 1 2
 0 10 -10 -2.2 4.6
 0 10 10 0 3.3
 1 10 -10 15 4.1
 -1 10 10 23.4 7.5
 1 10 -10 23.7 9.2
 -1 10 10 13.7 5
 1 -10 10 17.5 6.2
 -1 -10 10 21.3 6.8
 -1 10 -10 30.9 7.4
 1 10 10 10.9 5.4
 -2 10 10 40.9 8.8
 -2 10 10 56.79 7.5
 2 10 -10 60.29 8.3
 -2 10 10 69.09 8.6
 2 -10 10 58.79 10.5
 2 10 -10 54.39 8.5
 2 10 10 57.99 9.9
 -2 10 -10 64.79 9.2
 -2 -10 10 63.29 11.9
 0 11 10 1.7 3.3
 0 11 -10 0.9 2.2
 0 -11 10 1.9 3.8
 0 11 -10 4.3 4.6
 1 -11 10 28.5 7.3
 1 11 -10 19.1 3.9
 -1 11 10 21.4 6
 1 11 -10 10.1 8.7
 1 11 10 35.9 9.6
 -1 -11 10 29.5 6.9
 -1 11 -10 19.5 5.3
 2 -11 10 4.8 4.5
 -2 11 10 6.6 5.2
 2 11 -10 7.4 3
 2 11 10 -0.3 3.2
 -2 11 -10 0 2.7
 0 12 -10 32.3 8.2
 0 -12 10 40.2 7.6
 0 12 10 40.1 10.3
 -1 12 10 138.99 15.3
 1 12 -10 136.39 17.1
 1 -12 10 138.09 16.6
 -1 -12 10 128.09 13.9
 1 12 10 132.09 16.2
 -1 12 -10 160.28 14.4
 0 0 11 -4.4 2.7
 0 0 11 -2.6 2.6
 0 0 11 10.2 3.6
 0 0 -11 -0.1 1.4
 1 0 11 30.3 7.7
 1 0 11 32.9 6.3
 1 0 11 26.1 7.2
 1 0 -11 26.4 4.2
 -1 0 -11 30.4 4.7
 1 0 -11 25.6 3.6
 -1 0 11 28.9 5.6
 1 0 -11 44.9 7.6
 -1 0 11 34.2 7.8
 2 0 -11 -5.3 3.4
 -2 0 11 4.3 2.9
 2 0 11 -0.6 3.8
 2 0 11 4.5 3.9
 -2 0 11 1.7 2.8
 2 0 11 2.8 2.7
 3 0 11 868.71 67.29
 -3 0 -11 867.01 65.39
 -3 0 11 969.5 66.59
 -3 0 11 813.12 64.89
 3 0 -11 989.5 63.69
 -3 0 -11 819.02 63.49
 -3 0 11 1001.5 68.59
 3 0 11 908.51 70.59
 3 0 11 854.31 66.19
 0 -1 -11 609.84 42.4
 0 1 11 647.34 46
 0 -1 11 573.74 44.2
 0 1 11 649.93 44.5
 0 1 11 508.65 43
 0 -1 11 578.54 43.5
 0 -1 11 522.85 45.5
 0 1 -11 644.54 43.6
 1 -1 11 32.1 9.1
 1 -1 11 28.1 6.9
 1 1 -11 38.9 7.4
 -1 1 11 40.8 8.3
 -1 1 11 41.1 6.8
 -1 -1 -11 27.9 4.7
 1 -1 11 40.8 7.5
 1 1 -11 30.2 3.9
 -1 1 11 22.3 5.9
 -1 1 11 29.9 6.7
 -1 -1 11 34.8 7.6
 1 1 11 49.4 8.7
 1 -1 -11 37.2 4.4
 -1 -1 11 24.9 6
 1 1 11 37.2 7.3
 1 1 11 19.1 6.1
 -1 1 -11 37.5 5
 1 1 11 28.6 6.3
 1 -1 -11 44.3 7.6
 1 -1 -11 27.5 3.5
 -2 1 11 464.95 39.3
 2 -1 11 464.55 41.1
 2 1 -11 422.26 37
 -2 1 11 480.05 37.9
 2 -1 11 468.75 37.7
 2 -1 11 511.65 39.4
 -2 -1 -11 458.85 35.9
 -2 1 11 484.05 39.3
 -2 1 -11 551.24 38.4
 -2 -1 11 486.05 38.5
 2 1 11 506.75 39
 2 1 11 480.25 41
 -2 1 -11 463.85 35.8
 2 1 11 490.25 38.1
 -2 -1 11 490.45 39.4
 -3 -1 -11 327.87 29.2
 3 -1 11 311.77 29.6
 -3 -1 -11 337.37 27.5
 -3 1 11 371.36 28.9
 -3 1 11 328.37 29.3
 3 1 -11 383.76 30.9
 3 1 -11 361.86 27.3
 3 -1 11 368.96 31.7
 -3 1 11 422.26 32.5
 3 1 11 292.17 29
 3 1 11 357.16 30.8
 3 1 11 328.27 32.7
 -3 -1 11 382.46 29.1
 3 -1 -11 387.66 27.3
 -3 -1 11 345.77 30.3
 -3 1 -11 329.67 28.9
 -3 -1 11 352.66 31.1
 0 2 11 1.1 3.4
 0 -2 11 -1.8 3.1
 0 2 -11 -0.2 1.6
 0 2 11 -1.2 2.7
 0 -2 -11 2.6 1.7
 0 2 -11 0.8 1.8
 1 -2 11 116.39 14.6
 1 2 -11 119.39 15.3
 -1 -2 -11 103.39 10.2
 1 -2 11 113.49 12.5
 -1 2 11 104.19 11.7
 -1 2 11 118.89 13.1
 1 -2 11 103.59 11.5
 1 2 -11 107.99 9.5
 -1 2 11 98.19 12.4
 -1 -2 11 104.09 13.3
 -1 2 -11 108.09 11.2
 -1 2 -11 95.89 10.2
 1 -2 -11 102.79 9.4
 -1 -2 11 101.89 11.9
 1 2 11 133.79 14.1
 1 2 11 120.99 12.5
 1 2 11 98.99 11.7
 -1 2 -11 97.19 10.4
 2 2 -11 1512.95 110.09
 2 -2 11 1530.55 110.19
 2 -2 11 1804.12 115.79
 2 -2 11 1550.74 111.69
 -2 2 11 1687.73 112.59
 -2 2 11 1562.24 111.79
 -2 -2 -11 1671.23 108.59
 -2 2 11 1504.85 109.19
 -2 2 -11 1509.75 108.09
 2 2 11 1635.14 114.09
 -2 2 -11 1601.04 110.09
 2 2 11 1526.45 110.59
 2 2 11 1464.95 109.99
 -2 -2 11 1607.44 110.69
 -2 -2 11 1406.86 111.29
 -2 -2 11 1605.84 109.19
 3 -2 11 556.44 47.5
 3 2 -11 616.34 43.8
 -3 -2 -11 607.94 48
 -3 2 11 669.43 47.6
 3 2 -11 627.44 47.4
 3 -2 11 518.25 45.8
 -3 2 11 555.94 43.4
 -3 2 11 632.34 48
 -3 2 -11 678.33 47.5
 -3 -2 11 540.15 44
 3 2 11 691.93 51.69
 -3 2 -11 556.44 45.6
 3 -2 -11 653.03 43.5
 -3 -2 11 657.93 48.4
 -3 -2 11 624.64 48.1
 3 2 11 548.75 46.6
 3 2 11 502.85 45.8
 0 -3 -11 1298.57 90.99
 0 3 -11 1297.67 96.89
 0 3 -11 1339.37 91.69
 0 3 11 1325.87 93.79
 0 -3 11 1378.86 94.19
 1 -3 11 526.65 41.7
 -1 3 11 591.44 44.1
 -1 3 11 544.75 41.6
 -1 3 11 592.44 44.1
 -1 3 11 498.65 42.1
 -1 -3 -11 472.05 40.1
 1 3 -11 509.75 41.6
 1 -3 11 575.04 43.7
 1 -3 -11 536.35 39.4
 -1 -3 11 634.24 45.5
 -1 3 -11 550.04 40.7
 1 3 11 636.44 44.9
 1 3 11 526.65 41.5
 1 3 11 575.04 42.9
 -1 3 -11 660.93 42.4
 -1 -3 11 538.55 42.6
 2 -3 11 351.76 36.6
 2 -3 11 466.65 36.6
 2 -3 11 401.06 39.4
 -2 3 11 450.95 36.2
 -2 -3 -11 353.46 32.9
 -2 3 11 437.96 37.2
 2 3 -11 445.06 34.7
 -2 3 11 438.76 32.5
 -2 3 11 410.66 35.2
 2 3 11 416.96 34.3
 -2 -3 11 443.76 34.3
 2 3 11 372.26 33.5
 2 3 11 440.16 34.7
 -2 3 -11 402.06 32.3
 2 3 11 507.65 38.8
 -2 -3 11 453.45 36.8
 -2 -3 11 407.66 33.5
 -2 3 -11 492.75 35.1
 -2 3 -11 485.35 38
 3 -3 11 514.75 40.7
 3 3 -11 484.05 39.2
 -3 3 11 455.55 39.4
 -3 3 11 505.85 39
 3 3 -11 468.55 35.8
 3 -3 11 434.16 42
 -3 -3 11 487.75 39.9
 3 -3 -11 514.05 35.4
 -3 -3 11 494.95 40.2
 3 3 11 480.25 41.7
 -3 3 -11 482.85 39
 3 3 11 455.35 38.2
 0 4 -11 -4.2 1.9
 0 4 11 1.2 3.6
 0 -4 11 -2.5 2.9
 0 4 11 1.2 2.5
 0 4 -11 1.1 1.8
 0 4 11 -2.5 3.1
 0 -4 11 8 4.5
 0 -4 -11 0.9 1.5
 0 4 -11 1.8 2.4
 0 4 11 2.7 2.5
 -1 4 11 1602.44 123.29
 -1 -4 -11 1678.03 122.19
 1 -4 11 1658.23 123.19
 1 4 -11 1737.33 123.69
 1 4 -11 1630.94 121.59
 1 -4 11 1945.11 126.29
 -1 4 11 1761.12 122.19
 -1 4 11 1952.6 126.09
 1 -4 11 1903.51 128.19
 -1 4 11 1729.73 125.69
 1 -4 -11 1915.01 121.09
 1 4 11 1790.22 125.69
 1 4 11 1731.43 124.89
 -1 4 -11 1725.43 122.59
 -1 -4 11 1665.53 124.49
 -1 -4 11 1846.12 126.99
 -1 4 -11 1892.81 123.89
 -1 4 -11 2072.69 123.49
 -2 4 11 762.52 60.99
 2 -4 11 804.62 62.69
 -2 4 11 634.64 65.39
 2 -4 11 905.71 63.89
 -2 -4 -11 816.32 56.69
 2 4 -11 889.31 60.69
 -2 4 11 802.42 62.89
 2 4 11 671.53 57.39
 -2 4 -11 765.12 57.99
 -2 -4 11 921.91 70.89
 -2 -4 11 704.03 56.69
 -2 -4 11 836.92 60.09
 2 4 11 718.03 61.79
 3 -4 11 48.4 9.6
 3 4 -11 28.8 5.5
 -3 4 11 26.7 7.5
 -3 4 11 50.89 10.5
 3 -4 11 28.6 9.2
 3 4 -11 44.7 9
 -3 4 -11 34 7.2
 3 -4 -11 32.6 5.2
 3 4 11 34.5 9.7
 -3 -4 11 31.8 8.3
 -3 -4 11 23.6 7.2
 0 5 11 5919.91 427.96
 0 5 -11 5924.01 424.36
 0 5 11 6251.47 425.46
 0 5 -11 6959.4 425.86
 0 5 11 5905.51 426.56
 0 -5 11 6196.38 429.66
 0 -5 11 6573.74 428.26
 0 5 -11 7153.38 426.86
 -1 -5 -11 244.58 19.9
 -1 5 11 229.38 20.4
 1 -5 11 217.88 20.1
 1 5 -11 262.97 20
 1 -5 11 246.28 24.9
 -1 5 11 224.58 22.6
 1 5 -11 235.18 21
 -1 5 11 268.57 23.1
 1 -5 11 236.58 22.8
 1 5 11 235.78 22.2
 1 -5 -11 231.48 18.2
 -1 -5 11 226.98 23.5
 1 5 11 218.48 22.1
 -1 5 -11 241.68 20.6
 -1 -5 11 226.48 22.2
 1 5 11 234.68 20.6
 -2 -5 -11 88.39 10.6
 -2 5 11 105.19 13.4
 2 5 -11 98.89 9.9
 2 -5 11 97.49 11.4
 2 5 -11 84.99 11.3
 -2 5 11 110.89 12.7
 2 -5 11 101.29 14.1
 -2 5 11 86.29 13.6
 -2 5 -11 102.19 12.2
 -2 -5 11 85.79 11.7
 2 5 11 119.29 14.7
 -2 5 -11 98.69 11.8
 2 5 11 110.29 13.2
 -2 -5 11 93.59 13.4
 3 -5 11 2.4 6.9
 -3 5 11 10.1 4.9
 -3 5 11 5.1 4.3
 3 5 -11 -0.4 3.6
 3 -5 -11 2.4 2.5
 -3 -5 11 2 4.5
 -3 5 -11 -1.2 2.6
 -3 -5 11 1.9 4.5
 0 6 -11 -0.5 2.7
 0 6 -11 1.3 2.3
 0 6 11 4.9 2.6
 0 6 11 4.8 3.4
 0 -6 -11 -2 1.7
 0 6 -11 0.6 2.7
 0 -6 11 -2.2 3.2
 0 -6 11 -0.6 4
 0 6 11 1.4 3.9
 -1 6 11 1957.3 133.39
 1 -6 11 1996.6 134.99
 1 -6 11 2060.49 136.89
 1 6 -11 1750.72 130.69
 -1 6 11 2088.09 135.69
 -1 -6 -11 1873.21 130.69
 -1 6 11 1622.24 130.39
 1 -6 11 1666.33 130.69
 1 6 -11 2062.29 132.59
 -1 6 -11 1924.01 131.59
 -1 6 -11 1661.53 131.09
 1 6 11 1985.7 133.09
 -1 -6 11 1938.21 133.89
 -1 -6 11 1968 135.89
 1 6 11 2156.28 135.79
 -1 6 -11 1877.91 132.09
 -2 6 11 281.87 26.5
 -2 6 11 319.57 29.5
 -2 -6 -11 293.77 25.1
 2 -6 11 286.17 26.2
 2 6 -11 310.67 23.7
 2 6 -11 291.07 26.8
 2 -6 11 270.17 29.8
 2 -6 11 325.37 28.9
 -2 6 11 318.47 28
 2 6 11 304.17 27.6
 -2 -6 11 326.87 29.3
 -2 6 -11 304.57 26.6
 2 6 11 354.86 29.4
 -2 -6 11 313.87 27
 -2 6 -11 308.97 26.6
 3 -6 11 5.1 4.7
 -3 6 11 3.5 3.4
 3 6 -11 3.1 2.9
 -3 6 11 3.1 2.5
 3 6 -11 1.9 2.6
 -3 -6 11 -2.7 2.8
 3 6 11 5.5 3
 3 6 11 -3.2 6.9
 -3 -6 11 -2.5 2.7
 -3 6 -11 -1.8 1.9
 0 7 -11 1281.57 89.39
 0 -7 -11 1187.98 87.79
 0 -7 11 1207.28 91.79
 0 7 -11 1194.68 89.59
 0 7 11 1366.16 93.89
 0 7 11 1272.67 89.69
 0 -7 11 1483.45 94.39
 0 7 -11 1185.68 88.49
 1 7 -11 442.26 31.4
 -1 7 11 464.55 40.6
 1 7 -11 347.47 33.7
 -1 7 11 429.56 33.2
 -1 7 11 410.26 36.7
 1 -7 11 501.75 39.4
 1 7 -11 517.05 36.4
 -1 -7 -11 467.15 33.6
 1 -7 11 435.76 36.8
 1 7 11 441.16 37.5
 -1 7 -11 364.36 32.9
 1 7 11 443.96 34
 -1 7 -11 411.76 34.9
 -1 -7 11 501.95 37.3
 -1 -7 11 361.86 36.7
 2 7 -11 510.65 37.7
 -2 7 11 482.35 37.6
 -2 -7 -11 409.36 34.7
 2 7 -11 453.05 33.1
 -2 7 11 440.26 35.8
 2 -7 11 473.35 38.9
 2 -7 11 410.66 35.5
 -2 7 11 469.05 39.2
 -2 -7 11 476.55 39
 -2 7 -11 480.35 34.5
 2 7 11 385.86 36.4
 -2 -7 11 470.25 37
 -2 7 -11 465.25 37.2
 -2 7 -11 414.26 36.1
 -3 7 11 200.58 18.9
 -3 7 11 224.58 19.2
 3 -7 11 188.28 19.5
 3 7 -11 187.58 15.8
 3 7 -11 224.08 19.6
 -3 -7 11 204.58 19.6
 -3 7 -11 232.58 19.7
 -3 -7 11 157.68 17.3
 -3 7 -11 189.88 16.1
 3 7 11 201.38 19.7
 0 8 -11 0.8 2.1
 0 8 11 -3.2 4.4
 0 8 11 -2.5 3.5
 0 -8 11 7.3 4.6
 0 8 -11 1.4 2.4
 0 -8 -11 -5.3 2.3
 0 -8 11 -7.8 3.9
 0 8 -11 2.5 3.7
 -1 8 11 356.16 32.6
 1 -8 11 332.97 31.8
 1 8 -11 369.96 29.9
 1 8 -11 388.66 30.1
 -1 -8 -11 379.76 29.1
 -1 8 11 375.16 30.4
 -1 -8 11 387.96 32.2
 -1 8 -11 433.76 30.8
 1 8 11 355.06 32.8
 -1 8 -11 334.27 30.2
 -1 -8 11 282.47 31.1
 -1 8 -11 356.46 28.4
 -2 8 11 999.8 70.69
 2 8 -11 818.62 69.69
 -2 8 11 990.4 73.09
 2 -8 11 967.9 72.19
 -2 8 11 989.5 69.39
 2 8 11 925.81 71.89
 2 8 11 962.7 69.69
 -2 -8 11 1051.39 71.29
 -2 8 -11 1033.3 70.89
 -2 -8 11 1013.5 73.09
 -2 8 -11 873.01 66.79
 0 9 -11 184.78 16.2
 0 9 -11 163.88 16.5
 0 9 11 189.68 20.4
 0 -9 -11 146.29 15.1
 0 9 -11 163.08 17.8
 0 -9 11 172.98 18.8
 -1 9 11 271.17 25.9
 1 -9 11 259.87 25.3
 -1 9 11 293.57 23.3
 1 9 -11 249.18 22.7
 -1 -9 -11 240.48 22
 1 9 -11 261.37 26.7
 -1 9 -11 255.77 20.8
 -1 -9 11 235.18 24.6
 1 9 11 277.67 26.7
 -1 9 -11 330.47 24.9
 -1 9 -11 240.48 24
 -2 9 11 571.54 41.2
 -2 9 11 514.65 39.1
 -2 9 11 504.45 42.8
 2 9 -11 557.24 41
 2 -9 11 512.05 42.2
 -2 -9 11 531.55 43.1
 -2 9 -11 512.25 40.9
 2 9 11 485.45 42.4
 0 10 -11 2.5 3.8
 0 10 11 -5.3 3.4
 0 10 -11 0.5 2.3
 0 -10 11 -1.7 3.6
 -1 10 11 0.8 3.6
 1 10 -11 8.6 3.8
 -1 10 11 8 4.9
 -1 10 -11 8.2 4.5
 1 10 11 10.1 5.4
 -1 -10 11 2.8 3.9
 -1 10 -11 5.7 2.7
 -2 10 11 61.79 10.6
 -2 10 11 46.9 7.3
 2 10 -11 43.5 7.3
 -2 10 11 46.8 7.4
 -2 -10 11 74.09 15.7
 2 10 11 62.49 9.6
 -2 10 -11 57.59 8.6
 0 11 -11 41.8 8
 0 11 11 33.5 8.8
 0 -11 11 40.4 7.9
 0 11 -11 24 4.4
 1 -11 11 1.9 3.8
 1 11 -11 -1.4 1.7
 -1 11 11 -4.7 3
 -1 -11 11 2.4 3.5
 -1 11 -11 -3.7 2.8
 1 11 11 4.4 4.5
 0 12 11 2.5 3.5
 0 12 -11 4 5.7
 0 -12 11 -1.8 3.2
 0 0 -12 3 2.1
 0 0 12 3.8 3.8
 0 0 12 -1.8 3.5
 0 0 12 14 4.7
 1 0 12 1 2.7
 -1 0 12 2.4 3.7
 1 0 -12 0.9 1.7
 1 0 12 -3.4 3.2
 -1 0 12 -0.3 2.9
 1 0 -12 -1.5 1.4
 -1 0 12 -2.5 2.9
 1 0 -12 -0.3 3.5
 -1 0 -12 1.4 1.7
 1 0 12 6.9 3.7
 2 0 12 1.9 4.3
 -2 0 12 24.5 6.1
 2 0 12 10.3 5.8
 -2 0 12 10.1 4.3
 2 0 -12 15.8 5.3
 2 0 12 18.4 6
 3 0 -12 1.2 2.4
 3 0 12 3.1 4.5
 -3 0 12 1.9 3.7
 -3 0 12 0.7 2.8
 -3 0 12 6.5 3.4
 3 0 12 8 5.2
 0 1 -12 2.5 2.4
 0 -1 12 4.5 3.9
 0 -1 12 1.2 3.8
 0 1 12 3.5 3.8
 0 1 -12 0.3 1.5
 0 1 12 -0.4 3
 0 1 12 2.1 3.3
 0 -1 -12 1.2 1.6
 1 -1 12 117.99 14.8
 1 -1 12 117.29 12.5
 -1 1 12 106.59 12.8
 -1 1 12 105.09 12.9
 1 1 -12 118.79 9.8
 -1 1 12 123.19 14.1
 1 -1 12 107.79 13
 1 1 -12 117.49 12.3
 -1 -1 -12 97.09 10.5
 -1 1 -12 103.49 10.7
 1 -1 -12 107.39 10
 1 -1 -12 123.89 12.9
 1 1 12 112.99 12.5
 -1 -1 12 110.29 12
 -1 -1 12 120.09 14
 1 -1 -12 86.09 9.1
 1 1 12 131.39 15.2
 -2 1 12 224.58 20.5
 2 -1 12 191.08 20.1
 2 -1 12 199.78 21.1
 2 -1 12 205.68 23.3
 -2 -1 -12 205.48 18.7
 -2 1 12 202.38 22.3
 2 1 -12 216.28 20.1
 -2 1 12 231.48 21.8
 -2 -1 12 238.18 23.8
 -2 1 -12 235.78 20.6
 -2 -1 12 267.17 22.1
 2 1 12 197.38 23.2
 2 1 12 197.48 20.4
 -2 1 -12 229.38 21.7
 2 1 12 228.78 21.6
 -3 1 12 768.52 59.49
 -3 1 12 926.11 62.29
 -3 1 12 774.92 62.49
 3 1 -12 830.32 63.79
 3 1 -12 832.02 58.69
 3 -1 12 962.1 67.39
 3 -1 12 802.42 62.69
 3 -1 -12 784.82 58.29
 3 1 12 775.62 61.89
 -3 -1 12 756.92 62.39
 -3 -1 12 810.92 61.69
 3 1 12 968 67.29
 0 -2 12 89.09 11.2
 0 -2 -12 96.49 9.3
 0 2 -12 99.49 9.7
 0 2 -12 90.89 9.3
 0 2 12 101.49 10.9
 0 2 12 82.29 11
 0 -2 12 81.59 12.6
 -1 -2 -12 558.04 41.8
 -1 2 12 583.44 44.1
 -1 2 12 601.04 45.5
 1 -2 12 552.34 43.3
 1 2 -12 565.74 40.7
 1 2 -12 586.74 43.6
 1 -2 12 634.74 47.9
 1 -2 12 638.34 45.6
 -1 2 12 590.14 45.2
 1 -2 -12 472.65 40.3
 -1 2 -12 578.94 42.2
 1 2 12 645.74 47
 1 2 12 520.85 42.9
 -1 -2 12 542.55 45.3
 1 -2 -12 571.44 40.3
 -1 2 -12 583.24 42.1
 -1 2 -12 606.24 43.2
 1 2 12 540.75 43.1
 -1 -2 12 575.34 43.6
 -2 2 12 329.87 26.9
 -2 2 12 395.36 35.2
 -2 -2 -12 329.07 26.2
 2 -2 12 316.07 27.8
 2 2 -12 288.17 27.1
 2 -2 12 261.47 30.1
 -2 2 12 382.16 33.9
 2 -2 12 391.96 32.3
 -2 2 -12 348.87 27.9
 2 2 12 375.26 32.5
 -2 -2 12 314.77 30.6
 2 2 12 278.37 27.5
 -2 2 -12 343.97 26.2
 2 2 12 331.17 28.5
 -2 -2 12 295.17 27.5
 -2 2 -12 325.27 27.7
 -3 2 12 298.37 26.1
 -3 2 12 296.57 24.1
 3 -2 12 278.57 26.8
 3 2 -12 317.97 28.4
 3 2 -12 304.97 23.5
 3 -2 12 280.97 29.2
 -3 2 12 314.77 27.3
 -3 -2 12 283.87 27.1
 3 2 12 328.97 30.5
 -3 -2 12 304.47 26.9
 -3 2 -12 301.87 26.2
 3 2 12 272.17 25.9
 3 -2 -12 277.17 22.8
 0 3 -12 2 1.9
 0 -3 12 4.8 4.5
 0 3 -12 -0.5 2.6
 0 3 -12 -1.6 1.4
 0 3 12 0.6 3.2
 0 -3 -12 1.5 1.9
 0 -3 12 -1.7 3.4
 0 3 12 -0.2 2.6
 -1 3 12 350.86 32.2
 1 -3 12 362.16 35.1
 1 3 -12 403.16 32.4
 1 -3 12 383.66 33.6
 -1 -3 -12 380.06 30.7
 -1 3 12 391.56 33.9
 1 3 -12 427.56 30.3
 -1 3 12 449.86 34.8
 1 -3 12 362.36 31.9
 -1 3 12 423.26 32.3
 -1 3 -12 460.05 31.7
 1 3 12 376.96 34.2
 1 3 12 416.26 33.1
 -1 -3 12 430.06 35.5
 -1 3 -12 443.76 32.4
 -1 3 -12 449.56 31.6
 1 -3 -12 390.56 29.7
 -1 -3 12 414.26 33.2
 -2 -3 -12 699.53 50.69
 -2 3 12 702.13 53.79
 2 -3 12 663.53 54.09
 -2 3 12 777.72 54.99
 -2 3 12 719.83 55.69
 2 3 -12 657.13 53.39
 2 -3 12 642.34 52.19
 -2 3 -12 652.73 50.29
 -2 3 -12 672.73 52.29
 2 3 12 685.93 53.89
 -2 -3 12 666.33 54.19
 -2 3 -12 813.92 53.19
 2 3 12 686.13 55.69
 -2 -3 12 705.83 54.29
 -3 3 12 14.7 6.1
 -3 3 12 7.4 5.1
 3 -3 12 14.1 5.3
 3 3 -12 13.8 3.9
 3 3 -12 23.2 7.9
 3 -3 12 4.9 5.3
 -3 3 -12 22.5 6
 -3 -3 12 13.8 4.9
 -3 -3 12 19.5 5.5
 3 3 12 19.8 6.8
 0 -4 -12 861.51 53.49
 0 4 -12 748.93 53.89
 0 4 -12 754.82 55.09
 0 4 12 728.13 55.79
 0 4 12 738.73 55.09
 0 4 12 694.63 55.69
 0 -4 12 700.83 57.69
 0 -4 12 808.82 56.89
 0 4 12 652.63 55.79
 1 -4 12 697.83 63.69
 -1 4 12 883.71 61.39
 -1 4 12 905.91 63.39
 1 4 -12 778.12 58.79
 -1 -4 -12 872.61 59.69
 -1 4 12 864.01 63.29
 -1 4 12 820.62 59.39
 1 -4 12 883.61 63.69
 1 4 -12 843.92 61.29
 -1 -4 12 829.02 62.19
 1 4 12 922.81 62.79
 -1 -4 12 846.02 64.09
 1 -4 -12 899.01 58.39
 -1 4 -12 725.53 60.19
 -1 4 -12 728.03 59.49
 1 4 12 888.81 63.59
 -2 4 12 394.16 31.7
 2 4 -12 346.77 30.4
 2 -4 12 389.66 33
 -2 -4 -12 366.16 28.9
 2 -4 12 382.66 34.5
 -2 4 12 356.56 32.9
 -2 4 12 354.16 31.7
 -2 -4 12 378.86 30.3
 -2 -4 12 337.77 29.1
 -2 4 -12 356.96 30.3
 2 4 12 300.47 31.9
 2 4 12 328.57 30.1
 -2 -4 12 437.96 33.8
 -2 4 -12 393.76 30.4
 -3 4 12 14.4 6
 -3 4 12 23.5 8.8
 3 -4 12 23.1 7.5
 -3 -4 12 22.8 6.2
 3 4 12 10.4 6.6
 3 -4 -12 26.1 4.6
 -3 4 -12 13.9 5.9
 0 5 12 -0.6 3.6
 0 5 12 -1.1 3.4
 0 5 -12 0.8 1.6
 0 5 -12 0.1 2.5
 0 -5 -12 1.4 2
 0 5 12 4.4 3.1
 0 5 -12 4.1 3.5
 0 -5 12 -7.7 3.4
 1 -5 12 1397.66 97.49
 -1 5 12 1431.66 97.79
 -1 5 12 1464.55 94.59
 1 -5 12 1391.86 99.29
 -1 5 12 1561.94 97.79
 -1 -5 -12 1326.87 93.79
 1 5 -12 1224.08 94.49
 1 5 -12 1337.87 93.09
 1 5 12 1245.18 94.09
 1 -5 -12 1226.28 91.29
 -1 5 -12 1337.77 94.19
 1 5 12 1243.88 95.69
 -1 -5 12 1294.87 95.99
 -2 5 12 24.5 7.2
 2 5 -12 24.1 6.1
 -2 -5 -12 25.8 6
 2 -5 12 39.1 9.3
 2 -5 12 63.69 14.3
 2 -5 12 22 6.2
 -2 5 12 38.7 9.3
 -2 5 12 29.7 7
 2 5 -12 35.9 5.6
 2 5 12 23.7 6.6
 -2 -5 12 42.6 8.1
 -2 -5 12 37.2 8.6
 -3 5 12 109.99 13
 3 5 -12 111.09 10.5
 -3 5 12 124.79 13.7
 3 5 -12 117.49 13.4
 3 -5 12 96.99 13.9
 -3 -5 12 106.99 12.4
 3 -5 -12 96.29 9.5
 3 5 12 96.89 14.1
 -3 -5 12 100.09 13.6
 -3 5 -12 119.49 13
 0 -6 -12 2595.64 167.18
 0 6 -12 2797.72 169.88
 0 -6 12 2611.14 171.88
 0 -6 12 2436.76 172.78
 0 6 12 2282.67 165.98
 0 6 -12 2321.37 167.08
 0 6 12 2186.78 168.78
 0 6 12 2494.35 171.88
 -1 6 12 491.45 40.1
 -1 6 12 464.95 38.5
 1 -6 12 504.15 40
 1 6 -12 476.45 36
 -1 6 12 512.95 36.5
 1 -6 12 393.36 39.8
 1 6 -12 473.75 37.2
 -1 -6 -12 436.66 35.6
 -1 -6 12 530.45 49
 -1 6 -12 479.85 36.7
 1 6 12 415.56 46.8
 -1 6 -12 499.75 37.6
 -1 -6 12 478.95 38.8
 -1 6 -12 443.16 36.9
 2 6 -12 24 4.6
 2 -6 12 15.3 7.4
 -2 6 12 8.8 5.3
 2 6 -12 16.2 4.7
 -2 6 12 20.6 7.8
 2 -6 12 20.6 7.2
 -2 6 12 22.5 6.9
 2 -6 12 27.4 8.6
 -2 -6 -12 30.2 5.9
 -2 6 -12 18.7 5.2
 -2 -6 12 17 6.9
 2 6 12 25.4 6.6
 -2 6 -12 15.3 4.5
 2 6 12 14.6 6.2
 -2 -6 12 20.2 6.3
 -3 6 12 -2.6 2.4
 3 -6 12 -2.3 4.1
 3 6 -12 0.7 3.2
 -3 6 12 7.2 3.1
 3 6 -12 0.5 2.4
 -3 -6 12 -2 2.8
 3 6 12 -0.5 2.3
 -3 6 -12 -0.9 2.8
 -3 6 -12 1.7 2.1
 -3 -6 12 0.5 2.9
 0 7 -12 4.2 3.5
 0 7 -12 -1.7 3.7
 0 7 12 2.6 4.2
 0 -7 12 -5.8 4.2
 0 -7 -12 0.9 2.6
 0 -7 12 3 4
 0 7 -12 -2.3 1.9
 -1 -7 -12 480.05 36.6
 -1 7 12 458.35 38.5
 -1 7 12 509.35 40.7
 1 -7 12 577.04 41.5
 1 -7 12 440.66 40.6
 1 7 -12 451.45 37.8
 1 7 -12 469.65 34.4
 1 7 -12 460.25 36.9
 1 7 12 499.55 36.8
 1 7 12 477.15 40.2
 -1 -7 12 468.35 40.7
 -1 -7 12 531.85 40
 -1 7 -12 398.26 37.3
 -1 7 -12 454.15 37.2
 -1 7 -12 522.85 37.4
 -2 7 12 404.06 32.6
 2 7 -12 368.56 28.2
 2 -7 12 383.76 33.8
 -2 7 12 388.46 31
 -2 7 12 373.46 34
 2 7 -12 412.36 32.6
 -2 -7 12 382.36 31.9
 -2 7 -12 322.37 30.6
 -2 -7 12 416.16 34.3
 -2 7 -12 379.86 29.6
 2 7 12 395.36 33
 2 7 12 347.67 31.6
 3 7 -12 1.7 3.4
 3 7 -12 10.1 4.5
 -3 7 12 -3 2.5
 -3 7 12 -1.6 2.7
 3 -7 12 15.1 5
 3 7 12 6.2 3.9
 -3 -7 12 1.7 3.1
 -3 7 -12 2.1 2.5
 -3 -7 12 -3.4 2.8
 0 -8 12 124.59 15.4
 0 8 12 125.29 16
 0 8 -12 105.69 12
 0 -8 -12 105.99 11.3
 0 -8 12 128.79 15.4
 0 8 -12 104.89 13.1
 0 8 -12 110.79 12.2
 0 8 12 123.99 12.8
 -1 8 12 616.64 51.19
 1 -8 12 643.24 51.29
 -1 8 12 629.84 49.2
 1 8 -12 688.53 49.1
 -1 -8 12 665.93 52.39
 -1 8 -12 574.24 46.9
 -1 -8 12 655.53 50.69
 -1 8 -12 709.03 52.19
 -2 8 12 87.59 10.7
 -2 8 12 125.39 23.4
 2 8 -12 84.79 12.5
 -2 8 12 85.99 15.2
 2 8 -12 95.89 9.3
 2 8 12 113.39 13.4
 -2 -8 12 117.49 14.2
 -2 8 -12 99.79 9.8
 -2 8 -12 117.89 15.1
 2 8 12 102.29 11.1
 0 -9 12 -2.2 4
 0 9 -12 2 4.8
 0 9 -12 1.6 3.6
 0 9 12 1.2 3.9
 0 9 -12 -2.8 2
 1 9 -12 4.7 2.7
 1 -9 12 2.7 4.6
 -1 9 12 3.6 4.6
 -1 9 12 3.6 3.9
 -1 9 -12 6.4 2.8
 1 9 12 8.3 5.1
 -1 -9 12 5.4 4.3
 -1 9 -12 11.9 4
 -1 -9 12 7.2 5.5
 2 9 -12 434.86 33.2
 2 -9 12 467.45 35.2
 -2 9 12 441.36 33.1
 -2 9 12 374.46 30.6
 2 9 -12 361.76 33
 -2 9 12 428.26 35.3
 -2 -9 12 378.26 34.3
 -2 9 -12 371.36 32.3
 2 9 12 464.55 34.9
 0 -10 12 104.19 13.9
 0 10 -12 99.99 12
 0 10 12 110.19 15
 0 10 -12 112.69 14.3
 -1 10 12 7.5 4.7
 1 -10 12 23 6.8
 -1 10 12 13.6 4.9
 1 10 -12 18.6 4.8
 -1 -10 12 4.4 8.7
 -1 -10 12 15.5 5.7
 -1 10 -12 17.9 5.4
 -1 10 -12 23.6 3.6
 1 10 12 21.2 6.9
 0 11 12 2.6 3.4
 0 11 -12 -7.3 3.8
 0 11 -12 -3.1 2.1
 0 -11 12 -1 3.5
 1 -11 12 60.39 8.9
 -1 11 12 55.99 11.2
 1 11 -12 54.79 6.6
 -1 11 -12 47.8 7.7
 1 11 12 48.5 10
 -1 -11 12 59.09 8.7
 0 0 13 -0.9 3.3
 0 0 -13 0.2 1.8
 0 0 -13 -0.1 1.6
 0 0 13 0.4 2.5
 0 0 13 0.4 3.8
 1 0 13 18.5 6.5
 -1 0 13 21.1 6.4
 -1 0 -13 26 5.2
 -1 0 13 24.3 6.6
 -1 0 13 23.5 6.5
 1 0 13 35.9 8.1
 1 0 -13 26.8 6.2
 2 0 -13 -1.3 3.5
 -2 0 13 1.4 3.6
 -2 0 13 0.4 2.3
 -2 0 -13 2.3 3
 -2 0 -13 -3.2 2.1
 2 0 13 1.8 5.5
 2 0 13 2.4 4.7
 2 0 13 -4.2 2.9
 -2 0 13 4.8 3.5
 -3 0 13 69.39 11.6
 -3 0 13 83.39 10.1
 -3 0 13 107.39 13.3
 0 1 -13 177.98 14.8
 0 1 -13 165.58 14.7
 0 -1 13 152.88 17.9
 0 1 13 188.88 16.8
 0 -1 13 170.18 16.7
 0 1 13 135.99 16.2
 0 -1 -13 172.78 14.5
 0 1 13 135.39 16.7
 -1 1 13 38.5 9.5
 -1 1 13 25.5 6.6
 1 1 -13 23.7 6.3
 -1 -1 -13 33.5 5.3
 -1 1 13 17.4 5.7
 1 -1 13 17.5 6.6
 1 -1 13 31.6 8.1
 -1 -1 13 25.4 6.5
 1 1 13 33.2 7.1
 -1 1 -13 23.2 5
 1 -1 -13 27.3 5
 1 1 13 32.7 8.8
 -1 1 -13 27.9 5.9
 -1 -1 13 34.1 8.2
 -1 1 -13 30.2 5.9
 1 -1 -13 19.6 5.6
 -2 -1 -13 59.09 8.2
 -2 1 13 74.49 10.4
 -2 1 13 65.99 10.8
 2 1 -13 78.39 10
 2 -1 13 60.19 10
 2 -1 13 90.69 13.2
 2 -1 13 59.79 11.8
 -2 1 13 85.29 11.6
 2 1 13 75.49 11.3
 2 1 13 95.29 13.6
 -2 1 -13 63.29 8.7
 -2 1 -13 77.69 10.4
 -2 -1 13 79.99 11.3
 2 1 13 68.39 10.8
 -2 -1 13 73.79 10.7
 3 -1 13 211.48 23.6
 3 1 -13 196.58 20.1
 -3 1 13 198.08 17.7
 -3 1 13 190.38 18.9
 -3 1 13 243.88 25.5
 -3 -1 13 253.07 26.5
 -3 -1 13 210.78 18.5
 3 1 13 189.08 24.9
 0 -2 13 -1.3 3.4
 0 -2 13 3.4 3.6
 0 2 13 -2.2 3.4
 0 2 -13 1.5 2.1
 0 2 -13 -1.5 3
 0 -2 -13 0.7 2
 0 2 -13 2.7 2
 1 -2 13 8.1 4.8
 -1 2 13 12.4 4.8
 -1 -2 -13 9.2 3.2
 -1 2 13 19.7 5.9
 1 2 -13 7.4 4.3
 -1 2 13 22.3 7.1
 1 -2 13 14.4 6.4
 1 2 13 10.6 4.3
 1 2 13 12.3 5.9
 -1 2 -13 7.8 3.4
 -1 2 -13 5.2 2.9
 -1 2 -13 11.6 4.4
 -1 -2 13 6.3 4.1
 -1 -2 13 5.5 5.1
 1 -2 -13 7.5 3
 1 2 13 5.7 5.2
 -2 -2 -13 36.1 5.8
 -2 2 13 27.3 7.2
 -2 2 13 19.4 6.3
 2 -2 13 36 8.7
 -2 2 13 25.3 5.6
 2 2 -13 41.5 8.1
 2 -2 13 32.4 9.3
 2 2 13 15 5.9
 -2 2 -13 33.9 6.9
 2 2 13 37.4 8.1
 -2 -2 13 25 6.4
 -2 2 -13 32.6 6.6
 -2 2 -13 31.4 6.7
 -2 -2 13 30.5 7.8
 -3 2 13 43.8 5.6
 3 2 -13 45.6 8.5
 3 -2 13 46.1 15.3
 -3 2 13 42.2 8.9
 -3 2 13 27.4 6.2
 3 -2 13 70.99 11.7
 3 2 13 72.89 14.8
 -3 -2 13 32.2 7.8
 -3 2 -13 56.59 10.1
 -3 -2 13 45.5 6.9
 3 2 13 46.4 8.6
 3 -2 -13 59.59 6.6
 -3 -2 13 44.7 10.1
 0 -3 13 146.29 16.2
 0 -3 13 139.49 17.3
 0 3 13 135.19 15.4
 0 -3 -13 134.59 12.8
 0 3 -13 137.19 14.4
 0 3 13 153.98 15.8
 1 -3 13 265.67 28.7
 -1 3 13 301.37 27.9
 1 -3 13 321.67 28.1
 -1 -3 -13 291.57 24.3
 -1 3 13 302.87 26.3
 -1 3 13 305.87 25.7
 1 3 -13 316.77 26.3
 -1 3 13 303.97 27.8
 1 -3 -13 363.86 24
 -1 3 -13 241.28 23.8
 1 3 13 325.27 28.7
 -1 3 -13 304.77 25.7
 -1 -3 13 352.56 29.8
 -1 -3 13 287.37 26.2
 -1 3 -13 321.77 25.1
 -2 3 13 690.63 51.09
 2 -3 13 673.13 53.89
 2 -3 13 588.44 50.39
 2 3 -13 732.53 49.99
 -2 3 13 628.64 46.3
 2 -3 13 561.04 48.6
 -2 -3 -13 643.14 47.4
 -2 3 13 763.22 51.59
 2 3 13 579.44 51.49
 -2 -3 13 619.14 47.6
 -2 3 -13 612.14 47.9
 -2 -3 13 676.43 51.59
 -2 3 -13 618.94 48.9
 -2 3 -13 623.04 47.2
 -2 -3 13 622.74 48.5
 3 -3 13 42.6 9.2
 3 3 -13 56.09 8.6
 3 3 -13 52.69 6.3
 -3 3 13 32.1 7.5
 -3 3 13 44.3 9.2
 3 -3 13 45.8 11.3
 3 -3 -13 36.8 5.6
 3 3 13 47.1 7.9
 -3 3 -13 49.2 8.6
 -3 -3 13 27.4 6.4
 -3 -3 13 36.6 8.1
 3 3 13 36.7 9.2
 0 -4 -13 1.1 2.1
 0 -4 13 2.7 3.2
 0 4 13 -0.3 3
 0 -4 13 2 4
 0 4 13 -1.9 2.4
 0 4 13 -5 3
 0 4 -13 1.1 1.6
 0 4 -13 5.6 3.4
 -1 4 13 365.86 28.2
 -1 4 13 372.76 32
 -1 4 13 423.96 32.6
 -1 -4 -13 341.77 28.2
 1 4 -13 367.86 30.1
 1 -4 13 411.26 34.9
 1 -4 13 365.66 32
 -1 4 -13 288.57 27.7
 -1 4 -13 386.96 30
 1 -4 -13 323.67 26.7
 1 4 13 340.67 31.2
 -1 -4 13 414.56 33.6
 1 4 13 336.17 30.1
 -1 -4 13 362.76 30.8
 -2 -4 -13 46.8 7.3
 -2 4 13 48 9.6
 -2 4 13 39.5 9.5
 2 -4 13 38.6 9.6
 2 -4 13 30.8 8.5
 -2 4 13 61.49 11.3
 2 -4 13 22.8 6.1
 2 4 -13 48.6 7.9
 -2 4 -13 32.7 6.5
 -2 -4 13 39.8 8.6
 2 4 13 42.9 9.9
 -2 -4 13 54.09 8.2
 -2 -4 13 34.5 6.5
 2 4 13 52.49 9.6
 -3 4 13 -3.4 2
 3 -4 13 -9.2 5.6
 3 4 -13 4.1 3.1
 3 -4 13 -0.4 4.1
 -3 4 13 -0.3 2.6
 3 4 -13 4.7 2.6
 3 4 13 0.6 3.4
 -3 4 -13 3.2 2.6
 -3 -4 13 5.3 4.4
 -3 -4 13 3 3.9
 0 -5 13 717.83 56.69
 0 5 13 678.03 56.39
 0 -5 13 793.02 59.19
 0 5 13 717.83 55.89
 0 -5 -13 761.02 52.99
 0 5 -13 646.74 54.49
 0 5 -13 852.41 54.89
 0 5 13 733.03 53.99
 1 -5 13 10.5 7.5
 -1 5 13 26.5 5.7
 1 5 -13 18.8 5.6
 1 -5 13 16.8 6.7
 -1 -5 -13 23 5.2
 -1 5 13 14.7 6.2
 -1 5 13 10.7 5
 -1 5 -13 12 3.9
 -1 -5 13 14 6.8
 1 5 13 18.1 5.2
 1 5 13 22.1 6.7
 -1 5 -13 9.9 3.4
 -1 -5 13 17 6.3
 -2 -5 -13 37.1 7.2
 2 5 -13 45 5.9
 -2 5 13 42.3 8.5
 -2 5 13 66.99 12.4
 2 5 -13 53.49 9.9
 2 -5 13 33.5 8.5
 -2 5 13 40.4 9.9
 2 -5 13 38.3 9.5
 2 -5 13 29.3 7.6
 -2 -5 13 41.2 9.8
 -2 -5 13 34.8 7.5
 2 5 13 43 8.6
 2 5 13 52.79 11.4
 -2 5 -13 29.9 6.6
 -2 5 -13 24.5 5.7
 3 5 -13 1.2 2.3
 -3 5 13 1.2 3.1
 3 -5 13 -0.5 3.5
 -3 5 13 -2.6 2.2
 3 5 -13 6 3.2
 -3 5 -13 0.7 2.8
 3 5 13 -1 3.5
 -3 -5 13 -1.3 2.6
 -3 -5 13 -0.9 3.1
 0 6 13 4.8 4.6
 0 -6 13 0.6 5.3
 0 6 -13 -2.6 1.8
 0 6 -13 4.2 3.1
 0 6 13 0.8 2.4
 0 -6 13 -3.8 3.8
 0 -6 -13 3.1 2.5
 -1 6 13 288.47 24.9
 -1 6 13 353.26 29.6
 1 6 -13 322.87 26.8
 1 -6 13 336.87 29.4
 1 -6 13 292.17 29.7
 -1 6 13 324.57 27.8
 -1 -6 -13 327.87 25.3
 -1 -6 13 295.97 27.3
 -1 6 -13 279.27 25.1
 1 6 13 322.07 26.8
 -1 -6 13 239.28 27.9
 -1 6 -13 291.47 25.7
 -1 6 -13 310.17 26.6
 1 6 13 327.77 28.5
 2 -6 13 -7.7 3.8
 2 -6 13 -8.1 6.2
 -2 6 13 -0.1 2.5
 -2 6 13 -2.4 4.2
 2 6 -13 0.2 1.9
 2 6 -13 -2.1 3.2
 -2 6 13 -0.4 3.7
 -2 -6 13 -3.1 3.6
 -2 -6 13 1.4 3.3
 -2 6 -13 -1.8 2.5
 2 6 13 1.7 3.7
 2 6 13 -1 4.1
 -3 6 13 24.5 5.6
 3 6 -13 6.2 2.8
 3 6 -13 14 4.1
 3 -6 13 3.8 4.3
 -3 6 13 20.2 5.7
 -3 6 -13 15 4.7
 -3 -6 13 14 5.1
 -3 6 -13 11.7 3.1
 3 6 13 18 4.8
 -3 -6 13 7.5 4.3
 0 7 -13 217.38 20.1
 0 -7 13 246.78 24.8
 0 7 -13 243.08 21.5
 0 7 13 256.97 24.5
 0 7 -13 231.78 20.9
 0 -7 13 211.78 23
 0 7 13 220.98 20.9
 1 -7 13 544.45 48.6
 -1 7 13 542.05 45.6
 1 7 -13 500.15 43.2
 1 7 -13 576.64 40
 -1 7 13 635.64 45.2
 1 -7 13 579.34 46.2
 -1 -7 13 635.84 45.8
 1 7 13 482.05 44.6
 -1 7 -13 526.85 42.3
 -1 7 -13 562.94 42.7
 -1 -7 13 647.04 47.7
 1 7 13 539.05 41.6
 -2 7 13 70.89 10.8
 -2 7 13 75.09 9.3
 2 7 -13 66.39 10
 2 7 -13 70.09 7.6
 -2 7 13 74.89 12.9
 2 -7 13 90.09 18.2
 -2 7 -13 63.09 10.2
 2 7 13 77.89 10.9
 -2 -7 13 51.79 14.5
 2 7 13 75.59 10.7
 0 -8 13 5.5 5
 0 8 -13 5.3 4.1
 0 -8 13 6.4 4.5
 0 -8 -13 -5.1 3.8
 0 8 13 5.6 4.4
 0 8 13 2.8 4.7
 0 8 -13 8.5 5.2
 1 -8 13 21.9 7.2
 1 8 -13 20 5
 -1 8 13 33.8 9
 -1 8 13 38.9 7.7
 -1 8 -13 25.2 5.4
 -1 -8 13 26.3 8.6
 1 8 13 43.6 9.4
 -1 -8 13 24 7.6
 -1 8 -13 23.6 5.4
 -2 8 13 38.4 9.3
 2 -8 13 40.9 10
 -2 8 13 38.7 7.7
 2 8 -13 56.89 6.9
 2 8 -13 40.1 7.1
 -2 8 13 43.9 6.9
 -2 8 -13 40.2 5.6
 2 8 13 40.8 6.7
 -2 -8 13 53.99 10.2
 -2 8 -13 46.3 8.1
 2 8 13 51.99 8.7
 0 -9 13 -2.6 3.2
 0 9 -13 1.8 3.6
 0 9 -13 0.2 1.8
 0 9 13 -1.6 3.5
 -1 9 13 74.19 10.2
 -1 9 13 121.29 23
 1 9 -13 87.89 14.6
 1 9 13 80.09 13.7
 -1 9 -13 103.89 11.1
 -1 -9 13 71.59 12.2
 -1 9 -13 81.29 8.6
 -2 9 13 38.2 9.4
 2 9 -13 44.6 6.6
 2 -9 13 27.1 7.3
 -2 9 13 31.3 6.6
 2 9 13 44 7.9
 -2 9 -13 21.6 5.6
 -2 -9 13 23.9 7.4
 0 10 -13 2.7 2.2
 0 10 -13 4.3 4.9
 0 -10 13 -3.9 2.9
 0 10 13 2.6 5
 1 -10 13 -5 3.6
 1 10 -13 0.8 2.2
 -1 10 13 6.3 3.9
 -1 10 13 3.5 3.9
 1 10 13 8.3 4.9
 -1 -10 13 14.9 7.4
 -1 -10 13 -4.1 3.1
 -1 10 -13 1.8 2.8
 -1 10 -13 1.1 3.3
 0 -11 13 79.69 9.7
 0 11 -13 65.49 6.4
 0 11 13 56.69 9.9
 0 0 14 612.04 47.6
 0 0 14 557.54 44.1
 0 0 -14 631.74 43.2
 0 0 -14 537.15 42.7
 1 0 14 4.7 4.8
 -1 0 -14 0.5 2.4
 -1 0 14 -6.9 4.9
 -1 0 14 -2.8 2.9
 1 0 -14 5.9 3.9
 -1 0 -14 4.5 3
 -1 0 14 -3.3 2.6
 1 0 14 1.9 4
 2 0 14 46.5 9.9
 -2 0 14 65.29 12.7
 -2 0 -14 51.79 9.1
 -2 0 14 77.89 10.7
 2 0 -14 65.99 9.4
 2 0 14 82.19 13
 -2 0 -14 77.89 8.8
 2 0 14 53.49 11.4
 -2 0 14 58.29 9.8
 3 0 14 3.9 4.9
 3 0 -14 -2.2 2
 -3 0 14 -4.5 2.4
 -3 0 14 0.3 3
 3 0 14 6.5 4.9
 -3 0 14 1.4 2.9
 0 -1 14 3.7 3.9
 0 -1 -14 -1 2.1
 0 1 14 7.9 3.8
 0 1 14 5.1 4.6
 0 1 -14 0.2 1.9
 0 1 14 -3 3.5
 0 -1 14 2 3.8
 0 1 -14 -2.1 2.2
 0 1 -14 0.1 3.3
 1 -1 14 8 5.6
 -1 1 14 14.8 6
 -1 -1 -14 8.2 3.1
 -1 1 14 13.6 5.3
 -1 1 14 11.3 4.4
 1 1 -14 9.7 4.7
 1 -1 14 0.4 4.1
 -1 -1 14 3.5 4.3
 1 1 14 7.1 4.7
 -1 -1 14 2.5 4.2
 1 1 14 9 5.3
 -1 1 -14 10.7 3.4
 1 -1 -14 14.3 3.7
 1 -1 -14 10.5 4.7
 -1 1 -14 8.7 3.7
 2 -1 14 33.1 8.4
 2 -1 14 26.8 8.9
 2 -1 14 19 6.7
 -2 1 14 24.3 7.2
 2 1 -14 35.5 7.4
 -2 -1 -14 20.1 5.5
 -2 1 14 28.6 7.6
 -2 1 14 22.5 6
 -2 1 -14 22.8 5.3
 2 1 14 35.8 7.7
 2 1 14 29.3 8.1
 -2 1 -14 13.9 4.9
 -2 1 -14 18.1 5.3
 -2 -1 14 24.9 7
 -2 -1 14 33.1 7.9
 3 1 -14 29.8 7.3
 3 -1 14 20.8 6.6
 3 -1 14 26.9 7.2
 -3 1 14 31.1 4.9
 -3 1 14 29.2 6.4
 3 1 -14 27.1 4.9
 -3 1 14 43.5 8.3
 3 1 14 30 7.1
 -3 -1 14 32.5 6.4
 -3 -1 14 38.7 8.4
 -3 -1 14 22.4 5.2
 3 1 14 26.5 8
 3 -1 -14 32.8 5
 -3 1 -14 22.9 5.3
 0 2 -14 9.1 4.1
 0 2 -14 7.1 3.2
 0 2 -14 20.2 5.1
 0 2 14 9.3 4.7
 0 -2 -14 21 4.4
 0 2 14 8 4.8
 0 -2 14 10.3 6
 0 -2 14 12.3 5.9
 -1 -2 -14 2.6 2.5
 1 2 -14 3.2 3.4
 1 -2 14 -1.3 4.4
 -1 2 14 -3.2 3.1
 -1 2 14 2.7 3.5
 1 -2 14 4.9 3.9
 -1 2 14 -5.6 2.4
 -1 2 14 2 3.4
 1 2 14 0.6 4.7
 -1 -2 14 6.8 3.8
 -1 2 -14 -2.7 2.1
 -1 2 -14 0.9 2.4
 -1 2 -14 5.5 2.8
 1 2 14 -1.6 5.1
 1 -2 -14 -1.1 2.4
 -1 -2 14 6.7 7.8
 2 -2 14 34.2 9
 2 2 -14 53.79 8.8
 -2 -2 -14 57.39 7.8
 2 -2 14 51.19 10.6
 2 -2 14 71.19 13.1
 -2 2 14 66.19 10.6
 -2 2 14 56.59 8
 -2 2 14 50.99 11.2
 -2 2 -14 62.29 8.5
 -2 -2 14 60.59 9.9
 -2 2 -14 44 7.1
 -2 2 -14 69.29 11.7
 2 2 14 48.5 9.7
 3 2 -14 4.1 2.6
 3 2 -14 19.4 5.7
 -3 2 14 10.7 4.4
 3 -2 14 8.5 5.1
 -3 2 14 10.6 4.5
 3 -2 14 3 4.9
 -3 -2 14 4.9 5.3
 -3 -2 14 13.2 4.9
 -3 2 -14 7.3 3.9
 3 2 14 6.7 5.1
 3 -2 -14 9.2 3
 3 2 14 4.2 5
 -3 -2 14 5 3
 0 3 14 1.1 2.5
 0 3 -14 0.5 2.6
 0 -3 -14 -0.7 2
 0 3 -14 0 2.7
 0 3 14 7.1 3.7
 0 -3 14 -2.7 3.4
 0 -3 14 1 3.1
 0 3 14 2.5 4
 1 -3 14 -4 3.8
 -1 3 14 -2.9 3.3
 -1 -3 -14 0 2.4
 -1 3 14 -1 3.1
 -1 3 14 0.9 3.9
 1 3 -14 -4.1 3.3
 1 -3 14 2.6 4.6
 1 3 14 1.6 3.5
 -1 3 -14 -4.2 2.5
 1 3 14 -5.8 4.2
 -1 -3 14 3.5 4
 -1 3 -14 0.5 2.4
 1 -3 -14 0.9 2.6
 2 3 -14 6.9 4.4
 -2 3 14 9 3.4
 -2 3 14 9.8 4.9
 2 -3 14 11.2 6.5
 2 -3 14 29.4 9.3
 -2 -3 -14 20.5 5.2
 2 -3 14 12.1 5.5
 -2 3 14 4.7 3.7
 2 3 14 3.5 5.6
 2 3 14 9.8 5.2
 -2 -3 14 8.5 4.5
 -2 3 -14 10.1 3.4
 -2 3 -14 8.5 5
 -2 -3 14 14.5 5.2
 3 -3 14 4 4.7
 -3 3 14 4.6 3
 3 3 -14 -5.7 3.8
 3 -3 14 -2.6 5.2
 -3 3 14 1.9 3.4
 3 3 -14 -0.3 2.1
 3 -3 -14 5.3 2.2
 -3 3 -14 1.6 3
 -3 -3 14 8 4.1
 -3 -3 14 5.1 3.4
 3 3 14 9.1 5.3
 0 4 14 167.98 18.1
 0 -4 14 195.58 28.3
 0 4 -14 199.08 19.4
 0 4 -14 143.39 20.5
 0 -4 -14 167.28 15.6
 0 4 14 227.58 24.4
 0 4 14 198.28 19.6
 1 -4 14 104.99 16.2
 -1 4 14 120.39 12.2
 -1 4 14 123.59 13.3
 1 -4 14 127.29 16
 -1 4 14 137.69 15.8
 -1 -4 -14 140.49 12.7
 -1 4 14 144.49 16.1
 1 4 -14 128.09 13.9
 -1 -4 14 114.29 14
 1 4 14 87.49 13.6
 1 4 14 116.59 14.9
 -1 4 -14 93.99 12.6
 -1 -4 14 144.09 16.6
 -2 4 14 6.4 3.4
 2 -4 14 12.3 6.3
 2 4 -14 8.7 4
 -2 -4 -14 10.6 5.7
 -2 4 14 7.1 3.9
 2 -4 14 16.5 8.7
 -2 -4 14 8 5.2
 -2 -4 14 18 5.1
 -2 4 -14 3.1 3.1
 2 4 14 8.5 5.6
 -2 4 -14 16.6 6.8
 -2 -4 14 5 4
 -3 4 14 72.49 10.1
 3 -4 14 80.29 11.4
 3 4 -14 89.59 8.5
 3 4 -14 68.49 10
 3 -4 14 115.69 15
 -3 4 14 73.69 9.6
 -3 -4 14 64.69 9.6
 -3 4 -14 76.09 9.4
 -3 -4 14 74.39 10.1
 3 4 14 76.69 11.4
 0 5 -14 1.6 2.7
 0 -5 14 1.7 4.6
 0 5 -14 -5.8 2.9
 0 5 14 -0.5 4
 0 5 14 5.7 3.1
 0 5 14 -2.3 3
 0 -5 14 -5.2 4.4
 1 5 -14 1.5 3
 -1 5 14 2 4.4
 -1 5 14 3 4.2
 -1 5 14 7.3 3.8
 -1 -5 -14 0.4 2.9
 1 -5 14 -2.5 3.4
 1 -5 14 0.5 5.1
 1 5 14 -2.2 3.2
 -1 5 -14 2.6 3.3
 1 5 14 0.7 3.2
 -1 5 -14 2.5 3.2
 1 5 14 -0.2 3.6
 -1 -5 14 2.9 4.9
 -1 5 -14 3.3 2.8
 -1 -5 14 0.2 4
 2 -5 14 12.2 7.8
 2 5 -14 8.7 3
 2 -5 14 9.1 5.9
 -2 5 14 0 3.4
 2 5 -14 6.9 4.3
 -2 5 14 0.3 2.7
 -2 -5 14 2.6 3.8
 2 5 14 -0.8 7.3
 2 5 14 9.8 4
 -2 5 -14 10 4
 -2 -5 14 0.1 3.8
 0 -6 -14 38 6.6
 0 6 -14 37.2 7.7
 0 6 14 32.9 8.1
 0 -6 14 45.8 9.9
 0 6 -14 37.8 6.9
 1 -6 14 100.99 16.1
 -1 6 14 112.39 13.5
 -1 6 14 92.69 14.2
 1 6 -14 101.69 12.6
 1 -6 14 93.89 14
 -1 6 -14 90.79 13.8
 -1 -6 14 107.69 13.6
 1 6 14 97.79 13
 -1 -6 14 116.59 16
 1 6 14 107.29 12.4
 -1 6 -14 119.29 12.6
 -1 6 -14 106.39 12
 -2 6 14 127.49 15.9
 -2 6 14 116.79 18.1
 2 -6 14 104.89 18.8
 -2 6 14 95.99 11.7
 2 6 -14 103.69 10.6
 2 6 -14 90.49 16.1
 -2 6 -14 95.09 14.5
 2 6 14 90.19 20.7
 2 6 14 112.89 12.8
 -2 6 -14 116.59 12.5
 0 7 -14 4.3 4.4
 0 -7 -14 -4.2 3.3
 0 7 14 -3 3.5
 0 -7 14 6.3 4.7
 0 -7 14 -1.9 4.3
 0 7 14 0 3.6
 0 7 -14 1.9 2.3
 1 7 -14 -3.9 2.3
 -1 7 14 -1 3.5
 1 7 -14 0.1 2.3
 1 -7 14 -1.9 4
 1 -7 14 0.1 5.6
 -1 7 14 -2.2 4.2
 -1 -7 14 -4.6 3.1
 -1 7 -14 10.7 3.8
 1 7 14 -5.1 3.4
 -1 -7 14 4.9 4.3
 -1 -7 14 6.3 5.6
 1 7 14 2.3 2.8
 -1 7 -14 1.2 2.1
 -2 7 14 20.2 4.8
 -2 7 14 18.3 7.9
 2 -7 14 27.6 8.1
 -2 7 14 14.2 5.2
 -2 7 -14 20.7 4.5
 -2 -7 14 23.9 6.9
 2 7 14 18.9 5.5
 2 7 14 24.3 5.6
 -2 7 -14 9.4 3.7
 0 -8 14 2.5 4.2
 0 8 14 10.7 5.2
 0 8 -14 5.5 3
 0 8 14 5.4 5.4
 0 -8 14 2.8 4.6
 1 8 -14 17.7 4.3
 -1 8 14 27.4 7
 1 -8 14 31.3 9.4
 -1 8 14 37.6 8.8
 -1 -8 14 19.1 7.8
 -1 8 -14 36.1 6
 -1 -8 14 30 7.8
 -1 8 -14 20.4 6.3
 -2 8 14 -1.8 3.9
 2 8 -14 6 3.8
 -2 8 14 2.9 5.3
 2 -8 14 4.4 5.1
 -2 8 14 5.6 3.6
 -2 8 -14 9.9 3.2
 -2 -8 14 0.7 3.6
 -2 8 -14 11.4 3
 2 8 14 3.9 4.4
 0 -9 14 -10.2 4.7
 0 -9 14 8.9 5.6
 0 9 -14 0.5 2.1
 0 9 14 2.7 4.3
 1 -9 14 5.3 5.2
 -1 9 14 4.9 3.6
 -1 9 14 1 3.1
 -1 -9 14 -1.2 3.3
 -1 9 -14 8.8 2.7
 -1 -9 14 -0.5 4.3
 1 9 14 9.5 4.6
 -1 9 -14 -0.2 3.7
 0 10 -14 58.89 6.9
 0 -10 14 57.99 10.4
 0 10 14 58.09 9.7
 1 -10 14 115.79 12.6
 -1 10 14 87.29 10.4
 1 10 -14 105.39 10.2
 -1 10 14 94.49 12.6
 -1 -10 14 107.39 11.7
 -1 10 -14 85.09 9.9
 1 10 14 108.09 12.5
 -1 -10 14 67.99 12.8
 0 0 -15 -0.4 2.5
 0 0 15 8.2 4.5
 0 0 15 -7.1 4.2
 0 0 -15 -1.5 3.5
 -1 0 -15 297.37 26.4
 -1 0 15 334.17 29.6
 1 0 -15 334.67 32.1
 -1 0 -15 335.07 27.6
 1 0 15 324.17 28.8
 -1 0 15 348.17 30.4
 1 0 15 341.47 31.6
 -2 0 15 -2.7 2.6
 2 0 15 -5.5 4.3
 -2 0 -15 6.6 6.2
 -2 0 15 4.3 3.5
 -2 0 -15 3.1 3.9
 2 0 15 0.6 4.7
 -2 0 -15 7.8 2.8
 -2 0 15 7 5.4
 2 0 -15 1 4
 3 0 15 39.1 9.5
 -3 0 15 23.9 5.6
 -3 0 -15 31.9 5.7
 3 0 15 27.2 6.9
 -3 0 15 37.6 5.6
 3 0 -15 31.9 4.8
 0 1 15 662.83 53.39
 0 1 15 643.24 50.29
 0 -1 -15 684.23 48.8
 0 1 -15 715.53 50.89
 0 -1 -15 622.64 49.9
 0 1 -15 586.84 51.19
 0 1 -15 705.43 49.1
 0 -1 -15 617.64 49.7
 0 -1 15 763.72 55.09
 -1 1 15 4.9 4.2
 -1 1 15 3.6 4.9
 -1 -1 -15 4.4 3.2
 1 1 -15 11.9 4.4
 1 -1 15 7.2 4.9
 1 -1 15 5.6 5.6
 1 1 15 6.7 5.2
 -1 1 -15 2.3 3.3
 -1 -1 15 0.3 3.9
 -1 -1 15 9.1 5
 1 1 15 7.4 5
 -1 -1 15 6.2 7.1
 1 -1 -15 2.2 4.9
 -1 1 -15 3 2.7
 -2 1 15 6.7 4
 -2 -1 -15 -0.2 6
 2 -1 15 7.2 5.2
 2 1 -15 -0.2 3.5
 -2 -1 -15 6.1 5.5
 -2 1 15 8.5 5
 2 -1 15 9.7 5.5
 -2 1 15 8.5 5
 -2 -1 15 -0.7 2.5
 -2 -1 15 1.1 2.5
 2 1 15 16.7 5.7
 -2 -1 15 1.4 3.2
 -2 1 -15 6.7 5.9
 2 1 15 11.2 6.8
 -2 1 -15 -0.5 2.7
 -3 1 15 127.79 14.6
 3 -1 15 138.89 15.4
 3 -1 15 139.49 16.8
 -3 1 15 163.48 12.2
 3 1 -15 154.88 12.9
 -3 -1 -15 131.49 13.7
 -3 1 15 135.09 13.9
 -3 -1 15 141.59 13.5
 3 -1 -15 155.48 12.7
 -3 -1 15 152.38 13.9
 3 1 15 134.29 15.8
 -3 1 -15 168.78 14.5
 -3 -1 15 149.09 15.5
 3 1 15 153.38 17.3
 0 -2 -15 -2.1 2.2
 0 2 15 4.7 3.7
 0 -2 15 7.7 6.9
 0 2 15 4.2 3.6
 0 -2 15 1.7 4.1
 0 2 -15 3.1 2.5
 1 -2 15 112.69 15.5
 -1 2 15 88.49 13
 -1 2 15 109.99 13.4
 -1 2 15 104.19 12.3
 1 -2 15 77.29 12.4
 -1 -2 -15 79.69 9.6
 1 2 -15 110.59 12.2
 -1 2 15 99.39 12.4
 -1 2 -15 83.99 10.7
 -1 -2 15 81.49 12.6
 -1 -2 15 89.89 11.1
 -1 2 -15 76.59 10.2
 -1 -2 15 73.49 11.5
 1 2 15 106.19 14.1
 1 -2 -15 74.89 9.7
 2 2 -15 496.45 41
 -2 2 15 532.15 39.6
 2 -2 15 535.95 43.2
 -2 2 15 644.54 44
 -2 2 15 484.05 42
 2 -2 15 566.74 46
 -2 -2 15 494.95 41.3
 -2 -2 15 533.35 42.9
 2 2 15 495.95 40.9
 -2 2 -15 567.64 40.3
 2 2 15 459.95 43.8
 -3 2 15 -1.1 2
 -3 2 15 -2 2.4
 3 2 -15 -6.3 4.2
 3 -2 15 10 6.7
 -3 -2 -15 -1.2 2
 3 2 -15 1.5 1.8
 3 -2 -15 -2.5 1.7
 3 2 15 -4.6 3.9
 -3 2 -15 1.7 2.2
 -3 -2 15 2.1 2.7
 3 2 15 12.7 5.9
 -3 -2 15 0.8 2.5
 0 -3 -15 -0.3 2.6
 0 -3 15 7.3 4.3
 0 3 -15 0.7 2.4
 0 3 15 -1.7 2.8
 0 -3 15 -0.7 2.8
 0 3 -15 4.9 3.3
 0 3 15 1.7 3.5
 0 3 15 -2.3 2.3
 0 3 15 -3.8 3.1
 1 -3 15 127.79 15.6
 -1 3 15 121.69 14.1
 -1 3 15 127.99 16.2
 -1 3 15 138.69 16.4
 -1 -3 -15 137.39 13.3
 1 3 -15 114.59 13.8
 -1 3 15 148.59 14.3
 -1 3 -15 123.79 13.2
 -1 -3 15 129.99 16.4
 -1 3 -15 114.19 13.6
 1 3 15 134.69 16.4
 -1 3 -15 124.19 13.4
 -1 -3 15 131.09 14.6
 1 3 15 115.69 14.2
 2 -3 15 11.6 7.1
 2 -3 15 4 6
 -2 3 15 9 4.5
 2 3 -15 6.6 4
 -2 3 15 3.6 3.3
 -2 -3 15 5.2 3.6
 2 3 15 0.3 4.8
 -2 3 -15 2.9 2.9
 -2 -3 15 10.5 4.3
 0 -4 15 7.1 5.3
 0 4 -15 -0.1 3.6
 0 4 15 0.9 3.2
 0 -4 -15 -1.1 2.9
 0 4 15 3.9 3
 0 -4 15 -3.8 3.7
 0 4 15 0 3.5
 0 4 -15 -1 2.1
 -1 4 15 30.9 6.6
 -1 4 15 14.4 6.2
 -1 -4 -15 28 6.3
 1 4 -15 21.7 5.6
 1 -4 15 28.2 8
 -1 4 15 44 10.3
 1 -4 15 39.4 10.6
 -1 4 15 23.4 4.7
 -1 4 -15 25.6 5.3
 -1 4 -15 30.2 6.7
 1 4 15 36.5 7.9
 1 4 15 23.3 6.3
 -1 -4 15 18.7 7.3
 -1 -4 15 32.4 7.5
 -1 4 -15 36.7 8.4
 1 4 15 20.9 6.4
 2 4 -15 242.68 22.6
 -2 4 15 218.18 21.2
 2 -4 15 211.88 22.6
 -2 4 15 223.78 22
 2 -4 15 174.98 29.6
 -2 -4 15 209.48 22
 -2 -4 15 204.18 19.6
 2 4 15 256.67 23.8
 -2 4 -15 265.77 22.4
 0 5 15 857.91 64.39
 0 5 15 838.52 63.89
 0 5 15 834.92 61.09
 0 -5 15 858.51 64.69
 0 5 -15 855.01 63.29
 0 -5 -15 860.71 60.99
 1 5 -15 97.79 12.1
 -1 5 15 116.69 14
 1 -5 15 102.59 13.9
 1 -5 15 126.69 16.6
 -1 5 15 106.69 11.6
 -1 5 15 103.09 14.4
 -1 -5 -15 99.69 11.4
 1 5 15 107.19 13.3
 1 5 15 70.89 11.5
 -1 5 -15 89.89 11.8
 -1 5 -15 114.99 11.6
 -1 -5 15 121.29 15.8
 -1 5 -15 102.39 12.7
 -1 -5 15 93.79 12.6
 1 5 15 118.49 12.6
 -2 5 15 122.09 14.5
 2 -5 15 126.69 16.9
 -2 5 15 106.19 12.4
 2 5 -15 126.49 11.1
 2 -5 15 89.39 17.4
 2 5 -15 112.49 13.4
 -2 -5 15 126.29 14.9
 -2 5 -15 109.89 12.4
 -2 5 -15 115.89 12.2
 2 5 15 117.99 14.3
 0 6 -15 2.2 4.5
 0 -6 15 -0.7 3.8
 0 -6 15 0.4 4.9
 0 6 15 1.6 4.3
 0 6 15 6.2 5
 0 6 -15 0.7 2.7
 0 -6 -15 8 4.2
 1 6 -15 105.89 12.2
 -1 6 15 104.59 14.1
 1 -6 15 110.99 13.8
 -1 6 15 101.79 12.6
 1 -6 15 100.29 14.2
 1 6 15 77.49 12.2
 -1 -6 15 94.89 12.3
 -1 -6 15 102.39 11.9
 -1 -6 15 86.59 13.6
 1 6 15 85.39 10.9
 -1 6 -15 83.09 10.9
 -1 6 -15 66.99 10.8
 2 6 -15 101.59 12.1
 2 -6 15 103.49 15.2
 -2 6 15 81.09 10.4
 2 -6 15 100.89 13.6
 2 6 -15 86.69 9
 -2 6 15 100.59 12.3
 -2 6 -15 98.69 10.6
 -2 6 -15 105.79 10.8
 -2 -6 15 97.29 13.1
 2 6 15 98.29 11.8
 0 7 -15 15.4 4.5
 0 -7 15 28.7 8.4
 0 -7 15 22.6 7.4
 0 7 15 14.9 4.7
 0 7 15 13.7 5.7
 1 -7 15 119.99 15.5
 1 7 -15 110.89 12.9
 -1 7 15 111.89 14.3
 1 7 -15 127.09 10.5
 -1 7 15 108.69 15.2
 1 -7 15 123.99 16.3
 -1 7 -15 110.39 12.2
 -1 7 -15 109.69 12.1
 -1 -7 15 139.09 16.8
 -1 -7 15 107.79 15.2
 1 7 15 110.09 14.4
 -1 -7 15 135.39 13.1
 2 -7 15 2.2 4.3
 -2 7 15 0.2 2.7
 2 7 -15 -1.9 2.1
 -2 7 -15 -2 2.7
 -2 7 -15 -3.5 2
 -2 -7 15 5.6 3.8
 2 7 15 3.1 3.8
 2 7 15 1.4 5.2
 0 8 -15 2.8 1.9
 0 8 15 1.5 4.3
 0 -8 15 1.1 4.5
 0 -8 15 -3.5 6
 0 8 15 3.4 3.9
 -1 8 15 -4.2 2.9
 1 8 -15 8.9 3.7
 1 -8 15 9.4 5.2
 -1 8 15 12.6 6.1
 1 -8 15 -9.2 6.1
 -1 -8 15 -0.3 4.4
 1 8 15 1.9 4.3
 -1 -8 15 11.3 5
 -1 8 -15 5.3 2.6
 0 9 -15 547.95 37.3
 0 -9 15 456.55 39
 0 9 15 498.15 39.9
 0 -9 15 446.76 41.4
 -1 9 15 147.79 15.5
 1 -9 15 137.49 15.5
 1 9 -15 129.29 13.6
 -1 9 15 159.88 16.8
 -1 -9 15 156.78 15.3
 -1 -9 15 161.68 17.2
 1 9 15 148.59 15.5
 -1 9 -15 132.69 12.2
 0 0 16 449.16 39.1
 0 0 -16 517.55 40.5
 0 0 16 518.85 43.2
 0 0 -16 566.94 39.4
 -1 0 -16 4.9 3.1
 1 0 16 2.7 4.9
 -1 0 -16 1.7 3.4
 1 0 -16 -2.1 3.7
 1 0 16 -6.6 5.1
 -1 0 16 1.3 3.6
 -2 0 16 1.8 2.9
 2 0 16 2.4 3.9
 -2 0 16 -3.6 1.7
 2 0 -16 7.9 4.9
 -2 0 16 -1.2 3.5
 -2 0 -16 0.9 2.9
 0 -1 16 -3.6 3.9
 0 -1 -16 -1.5 3.5
 0 -1 16 1.8 4.5
 0 1 -16 -0.1 2.8
 0 1 16 2.8 3.5
 0 -1 -16 4 3.1
 0 1 -16 -1.3 3.4
 0 1 -16 -1.6 3.4
 -1 -1 -16 151.68 14.9
 -1 1 16 167.48 18.6
 1 -1 16 150.08 17.1
 1 -1 16 186.58 20.9
 -1 -1 -16 133.39 16.4
 1 1 -16 198.58 17.3
 -1 1 16 174.78 17.6
 1 1 16 152.78 16.2
 -1 1 -16 124.69 14.5
 1 -1 -16 159.08 16
 -1 1 -16 133.99 15.5
 -1 -1 16 144.99 17
 -1 -1 16 175.68 18.6
 1 1 16 163.88 19.3
 -2 1 16 5.1 4.3
 2 -1 16 3.9 5
 2 1 -16 0.6 4.1
 -2 1 16 2 2.9
 -2 -1 -16 5.2 3.4
 -2 1 16 3.9 3.6
 -2 1 -16 10.3 3.7
 -2 -1 16 5.4 3.3
 -2 -1 16 10.4 4.9
 -2 -1 16 4.4 4.4
 2 1 16 8.8 6.4
 2 1 16 20.2 6.5
 0 2 -16 14.2 4.4
 0 2 16 10.1 4.8
 0 2 16 -1.7 3.4
 0 2 16 -6.2 3.2
 0 -2 -16 11.4 4.5
 0 -2 -16 -2.6 3.3
 0 -2 16 10.2 4.3
 0 2 -16 -2.5 2.9
 0 -2 -16 -2.7 2.7
 0 -2 16 3.7 3.9
 -1 2 16 497.85 43.6
 -1 2 16 547.75 42.3
 1 -2 16 581.44 46.7
 1 2 -16 509.65 41.8
 1 -2 16 515.95 42.9
 -1 2 16 523.15 42.3
 -1 -2 16 577.84 44.1
 -1 -2 16 485.65 43.6
 -1 -2 16 482.75 40.3
 -1 2 -16 613.84 43.9
 1 2 16 565.34 45.2
 -2 2 16 164.38 15.1
 2 2 -16 180.68 17.5
 -2 2 16 164.48 19.8
 2 -2 16 214.48 24.9
 -2 -2 -16 153.88 15
 2 2 16 174.18 20.6
 -2 -2 16 208.58 22.1
 -2 -2 16 212.38 20.5
 -2 2 -16 140.99 15.3
 -2 -2 16 191.98 17.6
 0 3 16 4.2 3.9
 0 -3 16 -2.1 3.8
 0 3 16 4.4 3.6
 0 3 -16 -0.2 3
 0 -3 -16 3.4 2.8
 0 3 16 5.9 4.8
 0 -3 16 -3.1 4
 0 3 -16 -1.5 3.6
 1 3 -16 4.5 3.9
 -1 3 16 2.7 3.8
 1 -3 16 2 4.8
 -1 -3 -16 9.7 3.7
 -1 3 16 -2.1 2.5
 -1 3 16 10.3 5.2
 1 -3 16 2 4.8
 -1 3 16 8.8 5.3
 -1 -3 16 1 2.9
 -1 3 -16 -3.3 2.9
 -1 3 -16 4.6 4.4
 1 3 16 3.5 3.4
 -1 -3 16 3.3 4.5
 -1 -3 16 6.6 5.6
 2 -3 16 5.1 5.2
 2 -3 16 9.2 6.9
 -2 3 16 23.2 6.5
 -2 3 16 16.3 5.2
 2 3 -16 14.8 5.4
 -2 3 -16 16.3 4.2
 2 3 16 7 5.6
 -2 -3 16 19.2 5.3
 -2 -3 16 8.4 4.1
 0 4 16 7.2 4.4
 0 -4 16 15.8 5.9
 0 4 16 10.4 4.8
 0 4 -16 8.2 4.8
 0 -4 16 7.5 5.7
 0 -4 -16 6.3 4.2
 0 4 16 5.6 3.1
 0 4 -16 2.5 3
 1 -4 16 94.49 14.7
 -1 4 16 89.39 9
 1 4 -16 102.79 12
 -1 4 16 85.19 12.3
 -1 4 16 99.09 13.8
 -1 4 16 82.09 10.3
 1 -4 16 82.99 12.8
 -1 -4 16 103.89 14.1
 -1 4 -16 98.69 11.7
 -1 -4 16 72.39 11
 1 4 16 97.39 12.1
 1 4 16 90.69 11.5
 1 4 16 88.39 12.7
 -1 -4 16 81.89 11.2
 2 -4 16 -0.4 3.5
 2 -4 16 0.8 5
 2 4 -16 1.3 2.3
 2 4 -16 0.7 2.5
 -2 4 16 -1.6 2.7
 -2 4 16 -0.1 3.5
 -2 4 -16 1.6 3.4
 2 4 16 -1.7 3.4
 -2 -4 16 -2.9 2.6
 0 5 16 0.6 2.9
 0 -5 16 -0.8 4.1
 0 -5 16 -2.3 3.3
 0 5 -16 -0.6 3.1
 0 5 16 4.5 4.3
 0 5 16 0.6 3.5
 -1 5 16 -2.1 3.6
 1 -5 16 9.6 5.8
 1 -5 16 -0.3 4.7
 1 5 -16 10.1 3.6
 -1 5 16 -3.7 3.9
 -1 5 16 9.9 4.2
 -1 -5 16 -1 3.9
 1 5 16 -4.7 7.7
 -1 5 -16 9.1 4.4
 -1 -5 16 2.5 4.6
 1 5 16 1.8 3.8
 1 5 16 0.7 7.1
 -1 -5 16 4.5 2.8
 -2 5 16 4.5 3.5
 2 5 -16 1.6 2
 2 -5 16 2.5 4.4
 -2 5 16 5.3 3.6
 2 5 -16 -3.3 1.9
 2 -5 16 1.8 5.9
 -2 5 -16 1.1 2.4
 2 5 16 4.1 3.7
 -2 -5 16 0.6 2.8
 -2 5 -16 8.5 4.1
 0 6 16 128.29 15.1
 0 -6 16 108.89 15.3
 0 6 -16 133.49 14.2
 0 -6 16 146.79 16.6
 0 6 16 139.89 14.6
 -1 6 16 7.6 6.8
 -1 6 16 9.4 4.6
 1 -6 16 7 5
 1 6 -16 10.2 6.3
 1 6 16 -0.2 4.9
 1 6 16 11.9 4.6
 -1 -6 16 6.1 4
 1 6 16 5 3.3
 -1 6 -16 -1.1 3.1
 -1 -6 16 0.2 4.1
 -1 -6 16 7.1 4.6
 2 -6 16 33.7 8.3
 -2 6 16 31.9 5.8
 2 6 -16 30.8 4.6
 -2 6 16 41.1 8
 2 6 -16 37.7 6.5
 -2 -6 16 48.6 8.1
 -2 6 -16 38.9 6.9
 -2 6 -16 33.1 5.6
 2 6 16 30 6.2
 0 7 -16 -0.4 1.9
 0 7 16 -1.2 4.2
 0 -7 16 3 4.4
 0 7 16 2 3.3
 0 -7 16 -4.2 3.5
 -1 7 16 12.6 4.3
 1 7 -16 10.1 3.2
 1 -7 16 15.1 6.2
 -1 7 16 18.6 7
 1 -7 16 18.8 7.4
 1 7 -16 11 3.6
 -1 -7 16 16.2 5.2
 -1 -7 16 10.8 5.1
 -1 7 -16 18.6 4.5
 1 7 16 13.1 4.7
 0 -8 16 82.69 11.5
 0 8 16 73.09 10.7
 0 -8 16 82.09 12.3
 0 8 -16 76.49 9.3
 1 -8 16 13.3 6.1
 -1 8 16 9.4 5.1
 1 8 -16 18.6 4.7
 1 -8 16 7.2 7.8
 -1 8 16 9.3 4.2
 -1 -8 16 11.5 5.9
 -1 8 -16 10.4 3.4
 -1 -8 16 11.8 4.1
 1 8 16 5.5 3.6
 0 0 -17 -3.3 3.3
 0 0 17 5.6 6
 0 0 -17 0.9 3.7
 0 0 17 -0.3 4
 1 0 -17 113.09 13
 -1 0 17 118.29 14.4
 -1 0 17 113.19 13.8
 1 0 17 98.69 13.8
 1 0 17 103.09 15.2
 -2 0 17 -1.2 2.4
 -2 0 17 -0.5 2.5
 2 0 17 1.6 4.9
 -2 0 17 3.1 2.7
 2 0 17 -6.1 3.7
 0 -1 -17 54.79 8.5
 0 -1 17 32.1 8.8
 0 -1 17 44.2 9.1
 0 1 -17 59.19 9.1
 0 -1 -17 55.99 9.1
 0 1 17 66.29 12.7
 -1 1 17 172.38 19.5
 -1 1 17 213.28 20.5
 1 -1 17 233.78 23.9
 1 1 -17 198.08 19.4
 -1 1 17 207.48 21.6
 1 -1 17 195.18 20.4
 1 -1 -17 234.08 20.7
 -1 -1 17 218.78 21.5
 -1 -1 17 191.68 21
 1 1 17 240.38 23.5
 -2 1 17 21.1 4.7
 2 -1 17 22.7 5.8
 2 -1 17 18.6 6.5
 -2 1 17 12.4 4.4
 -2 1 17 25.7 6.7
 2 1 -17 23.2 6.1
 2 1 17 25.8 6.5
 2 1 17 41.9 10.1
 -2 -1 17 10 4.1
 -2 -1 17 11.4 4.3
 -2 -1 17 21.3 6.6
 0 -2 -17 0.5 4.2
 0 2 17 -2.1 2.5
 0 2 17 -0.9 3.5
 0 -2 17 0.6 3
 0 2 17 -0.3 4.6
 0 -2 -17 -5.8 4.8
 1 -2 17 33.5 8.8
 -1 2 17 23.6 7
 -1 2 17 23 6.2
 -1 2 17 43.7 8.9
 1 2 -17 49.99 7.6
 1 -2 17 36.1 9.2
 -1 -2 17 36.4 8.5
 -1 2 -17 35.6 7.2
 -1 -2 17 32.8 7.9
 1 2 17 33.7 7.8
 -2 2 17 3.5 3.8
 -2 2 17 -0.8 2.4
 -2 2 17 5.4 3.8
 2 -2 17 4.2 4.8
 2 -2 17 1.7 3.9
 -2 -2 17 1.8 3.2
 -2 -2 17 0.1 3.4
 2 2 17 2.6 3.9
 -2 -2 17 2.8 2.5
 0 -3 17 -2.1 3.6
 0 3 17 -1.5 3.2
 0 3 17 -4 4.3
 0 3 17 -0.5 3.2
 0 3 -17 -3.6 2.4
 0 -3 17 -2.1 4
 1 3 -17 10.9 4
 -1 3 17 21 5.2
 -1 3 17 10 4.8
 -1 3 17 12.7 5
 1 -3 17 13.1 5.6
 1 -3 17 13.2 7.3
 -1 -3 17 12.1 4.1
 1 3 17 13.3 5
 -1 -3 17 14.5 5.7
 -1 3 -17 14.1 4.8
 1 3 17 15.5 5.9
 2 -3 17 109.59 15.1
 -2 3 17 115.49 13.1
 2 3 -17 101.39 12.2
 -2 3 17 113.19 11.9
 2 -3 17 81.99 12.5
 2 3 17 101.99 15.5
 -2 -3 17 104.69 12.5
 -2 -3 17 120.79 13.3
 -2 -3 17 108.89 11.1
 2 3 17 115.39 14.1
 0 4 -17 0.2 2.6
 0 4 17 1.4 3
 0 -4 17 -3.3 3.1
 0 4 17 -0.6 3.2
 0 -4 17 -5.8 3.7
 0 4 17 -3.6 3.8
 -1 4 17 0.6 3.7
 1 -4 17 4.6 4.9
 -1 4 17 4.9 4.4
 -1 4 17 6.2 4
 1 4 -17 3.8 3.2
 -1 -4 17 6.5 4.4
 -1 -4 17 -0.4 5
 1 4 17 10.1 4.3
 1 4 17 -0.2 4.1
 -1 4 -17 14.6 5.2
 -1 -4 17 6.1 3.8
 2 4 -17 5.7 2.5
 -2 4 17 -1 2.8
 2 -4 17 9.6 5.1
 -2 4 17 2 2.4
 2 -4 17 1 3.8
 2 4 17 -4.2 2.8
 -2 -4 17 -1.7 3.3
 -2 4 -17 1 2.3
 -2 -4 17 5.9 4.1
 0 5 17 281.47 29.2
 0 5 -17 295.57 25.9
 0 5 17 326.67 26.6
 0 5 17 261.97 21.6
 1 -5 17 87.69 12.7
 -1 5 17 70.39 10.3
 -1 5 17 45.4 9.8
 1 -5 17 57.09 10.7
 1 5 -17 63.79 9.1
 1 5 17 57.29 8.2
 -1 -5 17 75.19 9.6
 1 5 17 48.4 8.5
 -1 -5 17 62.39 8.9
 -1 -5 17 69.79 11.8
 -1 5 -17 61.29 8.9
 1 5 17 70.59 9.4
 0 6 -17 -1.7 2.1
 0 6 17 -0.5 3.7
 0 -6 17 -1.6 3.9
 0 6 17 2.6 3.9
 0 -6 17 3.2 4.8
 -1 6 17 4.5 4.3
 1 -6 17 8.6 6
 1 6 -17 1.9 2.2
 -1 6 17 2.1 3.6
 1 -6 17 3.9 5
 -1 -6 17 3.5 5.2
 1 6 17 0.6 4.5
 -1 -6 17 7.3 4.5
 -1 6 -17 7 3.2
 -1 -6 17 -4 2.6
 0 7 17 3.4 4
 0 -7 17 4.3 4.1
 0 7 -17 3.4 2.3
 0 -7 17 0 3.7
 1 -7 17 8.7 5.1
 -1 7 17 13 4.2
 1 -7 17 10.4 5.1
 1 7 -17 10.1 4.1
 -1 7 17 1.6 3.7
 1 7 17 16.1 5.2
 -1 7 -17 17.4 4.4
 -1 -7 17 12.1 4.9
 -1 -7 17 8.9 4.6
 0 0 18 11 4.8
 0 0 -18 25.6 9.7
 -1 0 18 3.1 7.7
 1 0 -18 -0.9 4
 1 0 18 -1.7 6.5
 -1 0 18 -1.8 2.6
 -1 0 18 6.2 4.5
 1 0 18 16.1 6.2
 -1 0 -18 -2.6 3.1
 -2 0 18 117.69 13.5
 2 0 18 133.59 14.3
 -2 0 18 120.59 13
 -2 0 18 128.49 12.3
 2 0 18 133.99 15.9
 0 -1 -18 3 5.2
 0 1 18 1.6 3.6
 0 1 18 -6 3.9
 0 -1 18 -5.5 2.5
 0 -1 18 -5.2 5.2
 0 1 18 -0.7 2.5
 0 1 -18 -0.4 3.5
 1 -1 18 67.99 10.2
 -1 1 18 44.7 8.3
 1 1 -18 80.99 9.6
 -1 -1 -18 64.89 9.3
 1 -1 18 48.2 12.3
 -1 1 18 57.79 9.3
 -1 1 18 29 9.5
 1 1 18 85.99 16.7
 -1 -1 18 49.7 11.9
 -1 1 -18 62.09 9
 -1 -1 18 57.79 9.4
 -2 1 18 4.9 3.5
 -2 1 18 5.6 3.8
 2 1 -18 15.4 4.8
 -2 1 18 4.6 3
 2 -1 18 11 4.4
 2 1 18 5.2 3.9
 -2 -1 18 5 2.8
 -2 -1 18 9.3 4
 -2 -1 18 8.9 3.8
 0 -2 -18 68.39 10.9
 0 -2 18 46.7 8.6
 0 2 18 84.19 10.1
 0 -2 18 57.59 12.2
 0 2 18 56.19 10.9
 1 -2 18 11.1 6.9
 -1 2 18 3.8 3.2
 -1 2 18 5.7 3.4
 1 -2 18 18.3 6.3
 -1 -2 -18 8.2 4.7
 -1 2 18 2.8 3.6
 1 2 -18 15.2 4.9
 1 2 18 9.3 4.6
 -1 -2 18 8.8 4.3
 -1 2 -18 4.7 3.3
 -1 -2 18 7.4 3.9
 0 -3 18 -0.1 5.7
 0 -3 18 1.6 4.9
 0 3 18 -0.5 4
 0 3 -18 0.7 2.4
 0 3 18 -0.5 2.9
 1 -3 18 88.09 12.8
 -1 3 18 72.49 8.3
 -1 3 18 62.69 8.9
 -1 3 18 81.59 13.8
 1 -3 18 75.09 11.1
 -1 -3 -18 89.39 11.4
 1 3 -18 84.39 10.3
 1 3 18 79.89 10.5
 1 3 18 76.99 11.1
 -1 3 -18 109.49 11.5
 -1 -3 18 70.79 11.4
 -1 -3 18 89.79 10.9
 -1 -3 18 81.39 9.8
 0 4 18 350.96 27.2
 0 4 18 369.86 30.3
 0 4 18 356.46 29.1
 0 -4 18 321.57 31
 0 4 -18 370.56 29.4
 0 -4 18 331.37 28.8
 1 -4 18 -4.1 4.5
 1 4 -18 -2.5 2.5
 -1 4 18 -3.4 2.1
 1 -4 18 4.2 4.2
 1 4 18 3 4
 -1 -4 18 -5 3.4
 -1 -4 18 -1.8 2.5
 -1 4 -18 1.2 2.7
 1 4 18 -3.3 3.1
 0 -5 18 0 3.9
 0 5 18 -4.2 3.5
 0 5 -18 2.8 2.2
 0 5 18 -0.6 3.6
 0 -5 18 4.1 4.2
 1 -5 18 114.79 13.7
 -1 5 18 111.39 12.3
 1 5 -18 99.99 11.4
 1 -5 18 108.59 12.8
 1 5 18 85.99 11.3
 -1 5 -18 101.09 11.4
 1 5 18 93.39 10.1
 -1 -5 18 96.69 10.5
 -1 -5 18 107.39 13.2
 -1 -5 18 98.59 10.8
 0 6 18 147.79 14
 0 6 -18 147.89 14.2
 0 -6 18 138.79 16
 0 6 18 143.79 14.5
 0 -6 18 120.59 14.5
 0 0 19 0.9 3.6
 0 0 -19 -3.2 2.8
 0 0 19 -1.6 3.8
 0 0 19 1 3.6
 1 0 19 2.4 3.8
 -1 0 19 1.7 3.1
 -1 0 19 1.4 2.7
 -1 0 19 -2.2 2
 1 0 -19 -2.4 4.1
 -1 0 -19 -1.8 3.1
 0 1 19 68.19 10.3
 0 1 19 79.29 11.1
 0 -1 19 72.79 11.1
 0 -1 -19 69.89 10
 0 1 -19 74.09 10
 1 -1 19 8.4 6.1
 -1 1 19 -6.7 2.7
 1 -1 19 -2.9 7.3
 -1 -1 -19 3.2 3.3
 -1 1 19 0.2 3
 -1 1 19 2.7 2.9
 -1 -1 19 2.6 3
 -1 -1 19 -0.5 2.8
 1 1 19 0.8 3.5
 -1 1 -19 -1.4 3
 -1 -1 19 2.6 3.4
 0 -2 19 1.6 3.3
 0 2 19 -2.7 2.1
 0 2 -19 1.5 2.9
 0 2 19 1.6 3.2
 0 -2 19 10.3 5
 -1 2 19 73.39 13.1
 -1 2 19 50.29 6.8
 -1 -2 -19 52.39 9.6
 1 -2 19 41.3 8.4
 1 2 -19 55.89 7.9
 -1 -2 19 54.59 10
 1 2 19 54.19 8.5
 -1 -2 19 52.29 9
 -1 2 -19 57.19 8.2
 1 2 19 54.19 9
 0 3 19 -2.3 2.7
 0 3 19 -0.6 2.6
 0 -3 19 2 4.2
 0 -3 19 2.5 3.4
 0 3 -19 1.6 2.3
 1 -3 19 355.66 28.3
 1 -3 19 264.57 24.7
 -1 3 19 286.07 25.9
 1 3 -19 363.36 26
 1 3 19 291.47 25.4
 -1 3 -19 297.97 25.3
 1 3 19 284.27 25
 -1 -3 19 286.47 25.2
 -1 -3 19 298.57 26.3
 0 4 19 1.8 4.1
 0 4 19 -3.4 2.5
 0 -4 19 -2 3
 0 4 -19 1.8 2.7
 0 -4 19 -0.4 3.2
 0 0 20 618.44 48.3
 0 0 20 659.83 49.3
 0 0 -20 639.84 47.2
 0 1 20 1.2 2.8
 0 -1 20 -0.7 3.1
 0 1 20 1.8 2.9
 0 1 -20 1.6 3.4
 0 -1 20 4.4 4
 0 -1 20 -1.3 4.2

_iucr_refine_instructions_details
;
TITL ga_210122a_a.res in Pnnm
    ga_210122a_a.res
    created by SHELXL-2019/2 at 13:44:52 on 27-Oct-2022
CELL 1.34138 3.6813 11.59 15.8935 90 90 90
ZERR 1 0.0001 0.0004 0.0005 0 0 0
LATT 1
SYMM -X,-Y,+Z
SYMM 0.5-X,0.5+Y,0.5-Z
SYMM 0.5+X,0.5-Y,0.5-Z
SFAC C H N O
DISP C 0.014 0.007 57.1
DISP H 0 0 0.6
DISP N 0.024 0.013 109.9
DISP O 0.039 0.024 193.4
UNIT 24 24 20 1

L.S. 10
PLAN  5
SIZE 0.05 0.06 0.11
TEMP -100.16
BOND $H
MORE -1
CONF
fmap 2
acta
REM <olex2.extras>
REM <HklSrc "%.\\ga_210122a_a.hkl">
REM </olex2.extras>

WGHT    0.099600    0.130000
EXTI    0.062820
FVAR       1.28274
N1    3    0.746077    0.681591    0.653354    11.00000    0.02648    0.01357 =
         0.01159   -0.00003    0.00169   -0.00373
AFIX  93
H1A   2    0.753557    0.680726    0.598016    11.00000   -1.20000
H1B   2    0.824343    0.742400    0.681116    11.00000   -1.20000
AFIX   0
N2    3    0.605333    0.597264    0.780063    11.00000    0.01767    0.01274 =
         0.01172   -0.00017    0.00040   -0.00092
N3    3    0.500000    0.500000    0.649458    10.50000    0.02100    0.01240 =
         0.01233    0.00000    0.00000   -0.00015
C1    1    0.616160    0.590766    0.695136    11.00000    0.01264    0.01282 =
         0.01372   -0.00006    0.00029    0.00171
C4    1    0.644884    0.593195    0.956354    11.00000    0.01373    0.01170 =
         0.01449    0.00130    0.00131   -0.00037
AFIX  43
H4    2    0.744046    0.656979    0.926661    11.00000   -1.20000
AFIX   0
C2    1    0.500000    0.500000    0.818227    10.50000    0.01000    0.01185 =
         0.01373    0.00000    0.00000    0.00191
C3    1    0.500000    0.500000    0.911840    10.50000    0.01208    0.01418 =
         0.01100    0.00000    0.00000    0.00279

O1    4    0.206181    0.618100    0.500000    10.50000    0.03676    0.02439 =
         0.01848    0.00000    0.00000    0.00872
H1    2    0.265293    0.573478    0.454517    11.00000    0.06572
HKLF 4


REM  ga_210122a_a.res in Pnnm
REM wR2 = 0.1605, GooF = S = 1.247, Restrained GooF = 1.247 for all data
REM R1 = 0.0709 for 657 Fo > 4sig(Fo) and 0.0763 for all 760 data
REM 63 parameters refined using 0 restraints

END  
     
WGHT      0.0996      0.1300 

REM Highest difference peak  0.841,  deepest hole -0.936,  1-sigma level  0.363
Q1    1   0.0000  0.5000  0.6349  10.50000  0.05    0.84
Q2    1   0.0118  0.5654  0.5000  10.50000  0.05    0.83
Q3    1   0.0000  0.5000  0.8249  10.50000  0.05    0.82
Q4    1   0.0000  0.5000  0.8969  10.50000  0.05    0.78
Q5    1   0.0000  0.5000  0.5000  10.25000  0.05    0.78

  REM The information below was added by Olex2.
  REM
  REM R1 = 0.0709 for 657 Fo > 4sig(Fo) and 0.0763 for all 9314 data
  REM n/a parameters refined using n/a restraints
  REM Highest difference peak 0.84, deepest hole -0.94
  REM Mean Shift 0, Max Shift 0.000.

  REM +++ Tabular Listing of Refinement Information +++
  REM R1_all = 0.0763
  REM R1_gt = 0.0709
  REM wR_ref = 0.1605
  REM GOOF = 1.247
  REM Shift_max = 0.000
  REM Shift_mean = 0
  REM Reflections_all = 9314
  REM Reflections_gt = 657
  REM Parameters = n/a
  REM Hole = -0.94
  REM Peak = 0.84
  REM Flack = n/a

  
;
_olex2_submission_special_instructions 'No special instructions were received'
